## 1 **Title**

2 Integrative genomic analysis in African American children with asthma finds 3 novel loci associated with lung  
3 function

## 4 **Authors**

5 Pagé C. Goddard<sup>1,2,\*</sup>, Kevin L. Keys<sup>2,3,\*</sup>, Angel C.Y. Mak<sup>2</sup>, Eunice Yujung Lee<sup>4</sup>, Amy K. Liu<sup>5</sup>, Lesly-Anne Samedy-  
6 Bates<sup>4</sup>, Oona Risse-Adams<sup>2,6</sup>, María G. Contreras<sup>2,7</sup>, Jennifer R. Elhawary<sup>2</sup>, Donglei Hu<sup>2</sup>, Scott Huntsman<sup>2</sup>, Sam  
7 S. Oh<sup>2</sup>, Sandra Salazar<sup>2</sup>, Celeste Eng<sup>2</sup>, Blanca E. Himes<sup>8</sup>, Marquitta J. White<sup>2,+</sup>, Esteban G. Burchard<sup>2,4,+</sup>

8 <sup>1</sup>Department of Genetics, Stanford University, Stanford, CA, USA

9 <sup>2</sup>Department of Medicine, University of California, San Francisco, CA, USA

10 <sup>3</sup>Berkeley Institute for Data Science, University of California, Berkeley, CA, USA

11 <sup>4</sup>Department of Bioengineering and Therapeutic Sciences, University of California, San Francisco, CA, USA

12 <sup>5</sup>Memory and Aging Center, Department of Neurology, University of California, San Francisco, CA, USA

13 <sup>6</sup>Department of Biology, University of California, Santa Cruz, CA, USA

14 <sup>7</sup>Department of Biology, San Francisco State University, San Francisco, CA, USA

15 <sup>8</sup>Department of Biostatistics, Epidemiology and Informatics, University of Pennsylvania, Philadelphia, PA, USA

16 \* These authors share principal authorship equally

17 + These authors share senior authorship equally

18

19 Corresponding Author:

20 Kevin L. Keys, PhD

21 Lung Biology Center, Department of Medicine

22 UCSF Box 2911

23 San Francisco, CA 94158 USA

24 Telephone: +1 415 514 9931

25 Fax: +1 415 514 4365

26 Email: [klkeys@g.ucla.edu](mailto:klkeys@g.ucla.edu)

## 27 **Abstract**

28 Bronchodilator drugs are commonly prescribed for treatment and management of obstructive lung function  
29 present with diseases such as asthma. Administration of bronchodilator medication can partially or fully restore  
30 lung function as measured by pulmonary function tests. The genetics of baseline lung function measures taken  
31 prior to bronchodilator medication has been extensively studied, and the genetics of the bronchodilator  
32 response itself has received some attention. However, few studies have focused on the genetics of post-  
33 bronchodilator lung function. To address this gap, we analyzed lung function phenotypes in 1,103 subjects from  
34 the Study of African Americans, Asthma, Genes, and Environment (SAGE), a pediatric asthma case-control  
35 cohort, using an integrative genomic analysis approach that combined genotype, locus-specific genetic  
36 ancestry, and functional annotation information. We integrated genome-wide association study (GWAS) results  
37 with an admixture mapping scan of three pulmonary function tests (FEV<sub>1</sub>, FVC, and FEV<sub>1</sub>/FVC) taken before and  
38 after albuterol bronchodilator administration on the same subjects, yielding six traits. We identified 18 GWAS  
39 loci, and 5 additional loci from admixture mapping, spanning several known and novel lung function candidate  
40 genes. Most loci identified via admixture mapping exhibited wide variation in minor allele frequency across  
41 genotyped global populations. Functional fine-mapping revealed an enrichment of epigenetic annotations from  
42 peripheral blood mononuclear cells, fetal lung tissue, and lung fibroblasts. Our results point to three novel  
43 potential genetic drivers of pre- and post-bronchodilator lung function: *ADAMTS1*, *RAD54B*, and *EGLN3*.

## 44 **Keywords**

45 African-American, admixture, GWAS, lung function, asthma, integrative genomic analysis

## 46 **Introduction**

47 Asthma is a disease characterized by episodic obstruction of airways that affects nearly 339 million people  
48 worldwide (The Global Asthma Network, 2018) and is the most common chronic disease among children.  
49 Asthma constitutes a massive global economic burden, representing \$81.9 billion in medical costs in the United  
50 States alone (Nurmagambetov et al., 2018). As a complex disease, asthma results from both environmental and  
51 genetic factors, with genetic heritability estimates ranging from 0.35 to 0.90 (Ober & Yao, 2011). The advent of  
52 genome-wide association studies (GWAS) (Risch & Merikangas, 1996), combined with progressively larger  
53 sample sizes in recent years, has enabled researchers to query the genetic basis of asthma at unprecedented  
54 scale, with numerous loci identified in autoimmune and inflammatory pathways (Demenais et al., 2018).  
55 However, these loci account for a small portion of asthma liability (Demenais et al., 2018).

56 Pulmonary function tests are recommended to guide in the diagnosis of asthma and monitor patient status  
57 (Asthma and Allergy Foundation of America, 2019). During these tests, patients breathe through a spirometer  
58 that captures key measures of lung function, including the forced expiratory volume in 1 second (FEV<sub>1</sub>), which  
59 measures initial forced exhalatory capacity; the forced vital capacity (FVC), which measures the maximum total  
60 volume of air that a patient can forcibly exhale; and their ratio (FEV<sub>1</sub>/FVC). Lung function measures can be  
61 population-normalized according to expected lung function values that account for age, sex, height and  
62 ethnicity of the patient (Hankinson et al., 1999). Spirometric measurements can be taken both before  
63 bronchodilator treatment (Pre-BD) and after (Post-BD) to further understand lung function status. Historically,  
64 baseline lung function is measured with Pre-BD measures, but among people with asthma, post-BD lung  
65 function may best reflect lung health (Brehm et al., 2015).

66 While the genetic contribution to asthma and lung function has been extensively studied via GWAS, most  
67 analyses have relied on subjects of European descent (Demenais et al., 2018; Johansson et al., 2019; Pickrell et  
68 al., 2016; Z. Zhu et al., 2018). This overrepresentation of ethnically white subjects in biomedical research has

69 impaired the generalizability of genetic studies of complex disease (Burchard, 2014; Bustamante et al., 2011;  
70 Popejoy & Fullerton, 2016). Ethnic differences in lung function, particularly between African Americans and  
71 European Americans, have been reported for over 40 years (Binder et al., 1976; Glindmeyer et al., 1995; Hsi et  
72 al., 1983; Rossiter & Weill, 1974; Schwartz et al., 1988). Ethnic disparities in lung function were attributed to  
73 population differences in sitting height, as increased height leads to increased lung capacity. However,  
74 adjustment for sitting height only explains 42-50% of ethnic differences in lung function between African  
75 Americans and European Americans (Harik-Khan et al., 2004), suggesting that a simplistic reduction to ethnic  
76 differences in height cannot account for the observed disparity in lung function. Unequal socioeconomic  
77 conditions were also thought to contribute to ethnic differences in lung function (Braun, 2015; Quanjer, 2013,  
78 2015), but socioeconomic factors only account for 7-10% of unexplained variance (Harik-Khan et al., 2004). Self-  
79 identified race or ethnicity are commonly used in the clinic to interpret lung function measures, but these are  
80 not ideal variables for understanding *genetic* differences in lung function between populations. Kumar *et al.*  
81 observed that the proportion of global African genetic ancestry is inversely correlated with lung function (Kumar  
82 et al., 2010). Spear *et al.* later observed population differences among African Americans, Mexican Americans,  
83 and Puerto Ricans in bronchodilator drug response to albuterol, the short-acting  $\beta_2$ -adrenergic receptor agonist  
84 that is the most commonly prescribed drug for the treatment of acute asthma symptoms (Spear et al., 2019).  
85 Specifically, Spear *et al.* performed admixture mapping, a technique designed to identify regions of the genome  
86 where locus-specific ancestry drives variation in a disease trait (Shriner, 2013) that has been helpful in studies  
87 of complex diseases, including asthma and breast cancer (Féjerman et al., 2012; Pino-Yanes et al., 2015).  
88 However, admixture mapping studies comparing baseline and post-bronchodilator lung function have not yet  
89 been performed in African Americans. In this study, we address this gap in knowledge by evaluating the effect  
90 of locus-specific ancestry on both pre- and post-bronchodilator lung function measures in a pediatric case-  
91 control cohort of African Americans children and adolescents.

## 92 **Methods**

### 93 **Study Population**

94 The Study of African Americans, Asthma, Genes and Environments (SAGE) is a case-control cross-sectional  
95 cohort study of genetics and gene-environment interactions in African American children and adolescents in  
96 the USA. SAGE includes detailed clinical, social, and environmental data on both asthma and asthma-related  
97 conditions. Full details of the SAGE study protocols are described in detail elsewhere (Borrell et al., 2013;  
98 Nishimura et al., 2013; Thakur et al., 2013; Mak et al., 2018). Briefly, SAGE was initiated in 2006 and recruited  
99 participants with and without asthma through a combination of clinic- and community-based recruitment  
100 centers in the San Francisco Bay Area. All participants in SAGE self-identified as African American and self-  
101 reported that all four grandparents were African American.

102 Pulmonary function tests were taken prior to administration of albuterol bronchodilator medication for all  
103 individuals, both those with and without asthma. Post-bronchodilator spirometry measures were performed  
104 only for individuals with asthma. Analyses of pre-bronchodilator lung function measures included all 1,103  
105 asthma cases and controls with complete covariate information. Post-bronchodilator analyses were performed  
106 on the 831 asthma cases with post-bronchodilator measurements.

### 107 **Genotyping and Quality Control**

108 DNA was isolated from whole blood collected from SAGE participants at the time of study enrollment as  
109 described previously (Borrell et al., 2013). DNA was extracted using the Wizard<sup>®</sup> Genomic DNA Purification kits  
110 (Promega, Fitchburg, WI). Samples were genotyped with the Affymetrix Axiom LAT1 array (World Array 4,  
111 Affymetrix, Santa Clara, CA).

112 Genotype quality control was performed in PLINK v1.9 (Chang et al., 2015). Of the 772,703 genotyped variants,  
113 111,901 SNPs were excluded from analysis due to genotype missingness more than 5% ( $n = 28,211$ ), minor

114 allele frequency (MAF) less than 1% ( $n = 80,420$ ) or deviation from Hardy Weinberg expectations (HWE) at  $p <$   
115  $0.001$  ( $n = 3,270$ ). The final set of 660,802 genotyped markers. (Supplementary Table 1).

116 Genotyped SNPs were submitted to the Michigan Imputation Server (Das et al., 2016), phased using EAGLE v2.3  
117 (Loh et al., 2016), and imputed from the 1000 Genomes Project reference panel (The 1000 Genomes Project  
118 Consortium, 2015) using Minimac3 (Das et al., 2016). Imputed SNPs with imputation  $R^2 < 0.3$ , with deviation  
119 from Hardy-Weinberg equilibrium (HWE)  $p$ -value  $< 10^{-4}$ , or with minor allele frequency (MAF)  $< 1\%$  were  
120 discarded. Of the 47,101,126 imputed SNPs, a total of 31,146,322 were culled due to either low MAF ( $n =$   
121  $31,095,418$ ) or deviation from HWE ( $n = 50,904$ ). All variants in the imputed set showed a genotype missingness  
122 of no more than 5%. The final number of SNPs used in association analyses was 15,954,804 (Supplementary  
123 Table 1).

## 124 Outcome Phenotypes

125 Pulmonary function testing was performed at the time of recruitment according to the American Thoracic  
126 Society / European Respiratory Society standards (Miller et al., 2005; Pellegrino et al., 2005; Wanger et al.,  
127 2005) with a KoKo PFT Spirometer (nSpire Health Inc., Louisville, CO). Spirometry was performed both before  
128 and 15 minutes after administration of four puffs of albuterol (90ug per puff) through a 5-cm plastic mouthpiece  
129 from a standard metered-dose inhaler. Patients were assessed for the following spirometric measures before  
130 and after bronchodilator drug usage (pre-BD and post-BD, respectively): (a) FEV<sub>1</sub>, (b) FVC, and (c) FEV<sub>1</sub>/FVC. A  
131 total of six phenotypes were assessed for genotype association: pre-BD FEV<sub>1</sub> (Pre-FEV<sub>1</sub>), pre-BD FVC (Pre-FVC),  
132 pre-BD FEV<sub>1</sub>/FVC (Pre- FEV<sub>1</sub>/FVC), post-BD FEV<sub>1</sub> (Post-FEV<sub>1</sub>), post-BD FVC (Post-FVC), and post-BD FEV<sub>1</sub>/FVC  
133 (Post-FEV<sub>1</sub>/FVC). All phenotype values were normalized based on the expected lung function values calculated  
134 from the Hankinson equations (Hankinson et al., 1999), which account for age, sex, height, and self-reported  
135 ethnicity. Phenotype distributions were checked for normality and to detect outliers. Outliers were determined  
136 using the method of Tukey fences (John Tukey, 1977). For each phenotype, we computed the first quartile value

137 (Q1), the third quartile value (Q3), and the interquartile range (IQR). We declared as outliers all values outside  
138 of the range

139  $[Q1 - 3(IQR), Q3 + 3(IQR)]$ .

140 Individuals with outlier values for a phenotype were removed from association analyses for that phenotype.

## 141 Covariates

### 142 Age, Sex, and BMI

143 Biometric covariates such as age, sex, body mass index (BMI), and height were measured directly at time of  
144 recruitment. BMI was categorized into underweight, normal, overweight, and obese, according to CDC  
145 guidelines for defining childhood obesity (Barlow, 2007; Cote et al., 2013; Whitlock et al., 2005). An overweight  
146 status was defined as a BMI at or above the 85th percentile for the general population of children of the same  
147 sex and in the same age group. An obese status was defined as a BMI at or above the 95th percentile.  
148 Underweight individuals (bottom 5th percentile,  $n = 9$ ) were excluded from analysis.

### 149 Asthma status

150 Case status was defined as physician-diagnosed asthma supported by reported asthma medication use and  
151 symptoms of coughing, wheezing, or shortness of breath in the 2 years preceding enrollment.

### 152 Maternal Educational Attainment

153 Maternal educational attainment was measured at recruitment and included in analyses to control for  
154 socioeconomic status. It was coded as total years of education completed from the first grade: for example, a  
155 complete K-6 education was 6 years, a complete high school education was 12 years, and any additional years  
156 (college or trade school and beyond) were counted as 1 year each.

## 157 Genetic Ancestry

158 Global genetic ancestry was estimated for each individual with the ADMIXTURE software (Alexander et al.,  
159 2009) in supervised learning mode assuming one West African and one European ancestral population, with  
160 HapMap Phase III YRI and CEU populations as references (The International HapMap 3 Consortium, 2010). Local  
161 ancestry estimation was performed with RFMix (Maples et al., 2013; Spear et al., 2019) using the same two-  
162 way ancestry reference from HapMap Phase III.

## 163 Estimation of Genetic Relatedness and Genotype Principal Components

164 Genetic relatedness matrices (GRMs) were generated in R using GENESIS (Gogarten et al., 2019), which provides  
165 a computational pipeline for handling complex population structure. We used PCAir (Conomos et al., 2015) to  
166 correct for distant population structure accounting for relatedness, and PC-Relate (Conomos et al., 2016) to  
167 adjust for genetic relatedness in recently admixed populations. The resulting principal components provide  
168 better correction for population stratification in admixed populations compared to standard PCA on genotypes  
169 (Patterson et al., 2006).

## 170 Genetic Association Analyses

171 Genotype association testing was performed with the MLMA-LOCO algorithm from GCTA (Yang et al., 2011,  
172 2014) to correct for population structure using GRMs generated with GENESIS. Association of outcome  
173 phenotypes with allele dosages at 15,954,804 biallelic SNPs was performed with a “leave one chromosome out”  
174 model to avoid double-fitting tested variants. Other variables included in models were age, sex, BMI, maternal  
175 educational attainment, and three genotype principal components. Models of Pre-BD also included asthma  
176 status.

177 The suggestive and significant association thresholds for each outcome phenotype were determined by the  
178 effective number of independent statistical tests ( $M_{\text{eff}}$ ) calculated with CODA (Plummer et al., 2006). CODA



179 computes  $M_{\text{eff}}$  using the autocorrelation of  $p$ -values from GWAS. For our analyses,  $M_{\text{eff}}$  ranged from 488,819 to  
180 507,975 (Supplementary Table 2). The Bonferroni corrected genome-wide significant threshold was computed  
181 as  $0.05/M_{\text{eff}}$ , while the suggestive threshold was computed as  $(1/M_{\text{eff}})$ , yielding a single pair of thresholds for  
182 all six outcome phenotypes considered:  $p < 1.99 \times 10^{-6}$  for suggestive association, and  $p < 9.95 \times 10^{-8}$  for  
183 significant association (Supplementary Table 2).

184 Admixture mapping analyses were performed using linear regression models in R and local ancestry calls from  
185 RFMix for 454,322 genotyped SNPs. Counts of 0, 1, or 2 alleles of African descent were computed for each  
186 person at each SNP. Phenotypes were then regressed onto ancestral allele counts for each SNP while including  
187 age, sex, height, BMI, maternal educational attainment (as a proxy for socioeconomic status), and global African  
188 genetic ancestry proportion as covariates. Analyses with pre-BD outcome measures also included asthma status  
189 as a covariate.

## 190 Fine-mapping genetic associations

191 Functional fine-mapping with PAINTOR (Kichaev et al., 2014) was used to identify putative causal variants in  
192 novel loci deemed statistically significant by admixture mapping. PAINTOR applies a Bayesian probabilistic  
193 framework to integrate functional annotations, association summary statistics (Z-scores), and linkage  
194 disequilibrium information for each locus to prioritize the most likely causal variants in a given region.  
195 Functional annotations were selected per locus as recommended by the authors of PAINTOR (Kichaev, 2017).  
196 A subset of lung- and blood-related functional annotations from the Roadmap Epigenomics Project (Roadmap  
197 Epigenomics Consortium et al., 2015) and the ENCODE Consortium (ENCODE Project Consortium, 2012) were  
198 assessed for their individual improvement to the posterior probability of causality; the top 5 minimally  
199 correlated annotations were selected for each locus.

## 200 Annotation Tools

201 The NHGRI/EBI GWAS Catalog (Buniello et al., 2019), Ensembl Genome Browser release 98 (Cunningham et al.,  
202 2019) and gnomAD browser v3.0 (Karczewski et al., 2019) were used to look up known associations at significant  
203 loci according to our analyses. Annotation lookups in the gnomAD browser v3.0 used hg38 coordinates  
204 translated from our hg19-aligned genotypes via liftOver (Hinrichs et al., 2006). Data management, statistical  
205 analysis, and figure generation made extensive use of GNU parallel (Tange, 2018) and several R packages,  
206 including data.table, doParallel, optparse, ggplot2, and the tidyverse bundle (Calaway et al., 2018;  
207 Davis et al., 2019; Dowle et al., 2019; Wickham, Hadley, 2016, p. 2; Wickham, Hadley & Golemund, Garrett,  
208 2017).

## 209 Results

### 210 Cohort Characteristics

211 Characteristics of all SAGE participants included in analyses are shown in Table 1. Distributions of each lung  
212 function measure stratified by case/control status and bronchodilator administration (pre-BD vs. post-BD) are  
213 shown in Supplementary Figure 1. FVC showed no significant difference between asthma cases and controls  
214 (Kruskal-Wallis  $p$ -value = 0.073), while stratification by case/control status yielded significantly different  
215 distributions for FEV<sub>1</sub> (Kruskal-Wallis  $p$ -value =  $4.8 \times 10^{-7}$ ) and FEV<sub>1</sub>/FVC (Kruskal-Wallis  $p$ -value =  $1.5 \times 10^{-7}$ ).  
216 Among cases, statistically significant differences were observed between distributions of pre-BD and post-BD  
217 measures of FEV<sub>1</sub> (Kruskal-Wallis  $p$ -value =  $1.2 \times 10^{-38}$ ), FVC (Kruskal-Wallis  $p$ -value =  $5.4 \times 10^{-16}$ ), and FEV<sub>1</sub>/FVC  
218 (Kruskal-Wallis  $p$ -value =  $4.0 \times 10^{-29}$ ), illustrating a measurable effect of bronchodilator medication on lung  
219 function.

220 The global African genetic ancestry proportion in our sample varied from 30.7% to 100%, with an average  
221 proportion of 80.2% (Supplementary Figure 2), concordant with empirically observed averages (Baharian et al.,

222 2016). Global ancestry contained the same information as the first genotype principal component ( $R^2 = 0.984$ ,  
223 Supplementary Figure 3).

## 224 Genetic association testing finds novel and known loci

225 Figure 1 shows results from GWAS performed on pre-BD phenotypes (Pre-FEV<sub>1</sub>, Pre-FVC, and Pre-FEV<sub>1</sub>/FVC)  
226 and post-BD phenotypes (Post-FEV<sub>1</sub>, Post-FVC, and Post-FEV<sub>1</sub>/FVC) using linear mixed modeling. The association  
227 results showed no evidence of genomic inflation, with genetic control  $\lambda$  ranging from 0.98 to 0.99  
228 (Supplementary Table 2, Supplementary Figure 4). Table 2 lists the 18 genome-wide significant associations  
229 found, each associated with exactly one of the six lung function measures. An additional 252 variants were  
230 suggestively associated with at least one phenotype (Supplementary Tables 3–8). Of the 18 variants, 4 variants  
231 on chromosome 13 in a region spanned by the gene *ATP8A2* were associated with Pre-FEV<sub>1</sub>/FVC  
232 (Supplementary Figure 6). Two variants on chromosome 16 that were associated with Pre-FVC flanked the  
233 promoter region of *IRX3* (Supplementary Figure 7). A third variant associated with Pre-FVC was located on  
234 chromosome 20 near *THBD* (Supplementary Figure 8), a gene linked to venous thromboembolism in African  
235 American and Afro-Caribbean individuals (Hernandez et al., 2016). Two variants associated with Post-FVC were  
236 in a gene-rich region on chromosome 19 (Supplementary Figure 9), with the peak near *TMIGD2* and *SHD*, while  
237 eight other variants pointed to a second gene-rich region on chromosome 11 near *CXCR5* and *HYOU1*  
238 (Supplementary Figure 10). Post-FEV<sub>1</sub>/FVC was associated with a region on chromosome 15 near the genes  
239 *AKAP13* and *ADAMTS7P4* (Supplementary Figure 11).

240 Among the suggestive associations, a variant on chromosome 12 associated with Post-FEV<sub>1</sub> was near *BTBD11*  
241 (Supplementary Figure 12), a gene previously associated with Post-FEV<sub>1</sub>, Post-FEV<sub>1</sub>/FVC, and  $\Delta$ FEV<sub>1</sub>, the change  
242 in lung function due to bronchodilator administration (Hardin et al., 2016; Lutz et al., 2015), as well as BMI  
243 (Kichaev et al., 2019). A suggestive association with Pre-FEV<sub>1</sub> on chromosome 12 fell near *SCARB1*  
244 (Supplementary Figure 13), which was previously associated with FEV<sub>1</sub> and FVC (Wyss et al., 2018) and HDL

245 cholesterol levels (Wojcik et al., 2019). Another suggestive association with Pre-FEV<sub>1</sub> on chromosome 20 was  
246 near the gene *PTPRT* (Supplementary Figure 14), which was previously associated with thromboembolism  
247 susceptibility in 5,334 African American individuals (Heit et al., 2017).

## 248 Admixture mapping identified five novel loci not found by GWAS

249 Table 3 shows five regions where admixture proportions were statistically significantly associated with one of  
250 the six phenotypes. The three pre-BD phenotypes (Pre-FEV<sub>1</sub>, Pre-FVC, Pre-FEV<sub>1</sub>/FVC) were each associated with  
251 one region, while Post-FVC was associated with two distinct regions. Post-FEV<sub>1</sub> and Post-FEV<sub>1</sub>/FVC had no  
252 significant associations. None of the regions overlapped with those significant in our GWAS, and none showed  
253 large deviations from mean genome-wide African genetic ancestry. A small region on chromosome 21 that was  
254 significantly associated with Pre-FEV<sub>1</sub> flanked the genes *ADAMTS1* and *ADAMTS5* (Supplementary Figure 15).  
255 The region on chromosome 4 associated with Pre-FVC pointed to two candidate genes, *RCHY1* and *THAP6*, that  
256 had no prior lung disease associations (Supplementary Figure 17). A region on chromosome 19 associated with  
257 Pre-FEV<sub>1</sub>/FVC spanned the genes *ZNF557* and *INSR* (Supplementary Figure 18). Post-FVC was associated with  
258 two regions, one on chromosome 8 spanning the genes *ESRP1*, *INTS8*, *TP53INP1* and *NDUFAF6* (Supplementary  
259 Figure 19), and another on chromosome 14 encompassing *EGLN3* and *SNX6* (Supplementary Figure 20).

## 260 Functional fine-mapping found three novel putatively causal loci for lung function 261 phenotypes

262 Table 4 lists the most probable causal SNP for each of the five admixture mapping loci according to PAINTOR.  
263 SNP rs13615 showed the highest probability of causality (0.630) with Pre-FEV<sub>1</sub> on locus 1 (Figure 2). This variant  
264 falls within the 3' untranslated region of *ADAMTS1*, suggesting that *ADAMTS1* drives the admixture mapping  
265 association and not its physical neighbor *ADAMTS5*. The minor allele frequency of rs13615 in African and African  
266 diaspora populations was lower than every other global population (2.6% AFR vs. 7.0 – 54.5% other populations,  
267 gnomAD v3; see Supplementary Figure 21). The SNP rs10857225 emerged as the most likely causal variant

268 (probability 0.361) for the association of Pre-FVC with locus 2 on chromosome 4 (Figure 3). This variant is  
269 located within an intron of the gene *THAP6*, suggesting that *THAP6* is more likely the causal gene behind the  
270 association with Pre-FVC. In contrast to locus 1, the minor allele frequency of rs10857225 is highest in global  
271 African populations and markedly lower in other global populations (59.1% AFR vs. 28.1 – 38.4% other  
272 populations, gnomAD v3). Locus 3 on chromosome 19 associated with Pre-FEV<sub>1</sub>/FVC, and locus 4 on  
273 chromosome 8 associated with Post-FVC, showed little information gain from functional fine-mapping. The  
274 driving variant for locus 3, SNP rs72986681, was located in the 3' untranslated region of *ZNG557*, but showed  
275 a low probability of causality (0.168, Supplementary Figure 22). The most probable marker for locus 4, the SNP  
276 rs2470740, which is located in intron 2 of *RAD54B*, showed an even lower probability of causality (0.109,  
277 Supplementary Figure 23). Functional fine-mapping of locus 5, a region on chromosome 14 associated with  
278 Post-FVC, yielded the SNP rs1351618 with a moderate probability of causality (0.390, Figure 4). rs1351618 is  
279 located in an intron of *EGLN3*. As with locus 2, rs1351618 had a much higher minor allele frequency in  
280 populations of African ancestry versus other global populations (12.4% AFR vs. < 2.2% other populations,  
281 gnomAD v3).

## 282 Discussion

283 We analyzed the genetic basis of six lung function phenotypes in 1,103 African American children with and  
284 without asthma. The phenotypes consisted of three standard spirometric measures – FEV<sub>1</sub>, FVC, and FEV<sub>1</sub>/FVC  
285 – measured before and after administration of bronchodilator medication. Our GWAS identified 18 genome-  
286 wide significant loci, while our integrative genetic analysis approach that layered GWAS, admixture mapping,  
287 and functional fine-mapping identified another 5 putatively causal loci that could drive differences between  
288 pre- and post-bronchodilator lung function.

289 The four variants on chromosome 13 associated with Pre-FEV<sub>1</sub>/FVC pointed to *ATP8A2* as a candidate gene.  
290 *ATP8A2* encodes an ATPase involved in phospholipid transport and is highly expressed in brain tissue, testes,

291 and the adrenal glands, and to a lesser degree, lung (Fagerberg et al., 2014). Mutations in *ATP8A2* have been  
292 linked to several neurological disorders (Martín-Hernández et al., 2016). Two variants on chromosome 16 that  
293 were associated with Pre-FVC point to *IRX3* as a candidate gene. *IRX3* encodes a homeobox protein crucial for  
294 neural development and its promoters previously showed a long-range interaction with the *FTO* gene.  
295 Expression levels of the *FTO* gene are known to influence BMI and are of great interest in type II diabetes and  
296 obesity research (Smemo et al., 2014). Post-FVC showed associations on two chromosomes. Notable genes  
297 near the association peak on chromosome 19 included *MAP2K2* and *ZBTB7A*, genes associated with variation  
298 in BMI, visceral adiposity, and eosinophil counts (Kichaev et al., 2019; Pulit et al., 2019; Rieger et al., 2018);  
299 and *CHAF1A*, *HDGFL2*, *PLIN4*, *ANKRD24*, *MPND*, and *SH3GL1*, previously associated with corpuscular volume  
300 and hemoglobin concentration (Astle et al., 2016; Kichaev et al., 2019; van Rooij et al., 2017). Interestingly, the  
301 two genes closest to the association peak, *TMIGD2* and *SHD*, have not been previously associated with any  
302 traits. *TMIGD2* is involved in T-cell co-stimulation and the immune response through an interaction with *HHLA2*,  
303 suggesting that it could possibly play an immune or allergic response role in lung function (Y. Zhu et al., 2013).  
304 Among the genes within or near the chromosome 11 peak, two emerge as potentially key loci. The first is *CXCR5*,  
305 which has been linked to increased risk of childhood onset asthma (M. A. R. Ferreira et al., 2019; Johansson et  
306 al., 2019; Pividori et al., 2019) and respiratory disease (Kichaev et al., 2019), as well as related allergic and  
307 immunological conditions such as eczema, leukocyte count, rheumatoid arthritis, and Sjögren's syndrome (M.  
308 A. Ferreira et al., 2017; Kichaev et al., 2019; Laufer et al., 2019; Lessard et al., 2013). The second is *HYOU1*,  
309 which has been associated with BMI and Post-FEV<sub>1</sub>/FVC (Lutz et al., 2015; Pulit et al., 2019). Post-FEV<sub>1</sub>/FVC was  
310 associated with two genes, *AKAP13* and *ADAMTS7P4*. *AKAP13* has been previously associated with numerous  
311 conditions, including interstitial lung disease and psoriasis in European individuals (Fingerlin et al., 2013; Tsoi  
312 et al., 2015) as well as weight, BMI, and cardiovascular traits such as blood pressure and hemoglobin count in  
313 multiple populations (Giri et al., 2019; Kichaev et al., 2019). *ADAMTS7P4* was previously associated with red  
314 blood cell volume (Kichaev et al., 2019). The statistically suggestive association of Post-FEV<sub>1</sub> with *BTBD11*

315 pointed to previous associations with various lung function measures, including Post-FEV<sub>1</sub>, Post-FEV<sub>1</sub>/FVC, and  
316  $\Delta$ FEV<sub>1</sub> (Hardin et al., 2016; Lutz et al., 2015). These previously detected associations were based on much larger  
317 sample sizes than what was available to us: the associations with Post-FEV<sub>1</sub> and Post-FEV<sub>1</sub>/FVC found by Lutz  
318 et al. were discovered in a population of 10,094 European and 3,260 African American smokers with chronic  
319 obstructive pulmonary disorder (COPD), while the association with  $\Delta$ FEV<sub>1</sub> found by Hardin et al. was based on  
320 5,766 Europeans and 811 African Americans with COPD, suggesting that our inability to reach genome-wide  
321 significance in our sample was insufficient statistical power.

322 Among significant and suggestive GWAS loci, the association of Post-FVC with variants in or near *CXCR5* and  
323 *HYOU1* is the only one that replicates known lung function loci: *CXCR5* was previously associated with asthma  
324 (M. A. R. Ferreira et al., 2019; Johansson et al., 2019; Pividori et al., 2019), and *HYOU1* was previously associated  
325 with Post-FEV<sub>1</sub>/FVC (Lutz et al., 2015). The association with Post-FEV<sub>1</sub>/FVC comes from an adult COPD cohort  
326 ascertained by smoking status; in contrast, SAGE is a pediatric asthma cohort. The mechanism by which *HYOU1*  
327 affects lung function in both youth and adults is unclear. Nevertheless, the overlap of post-bronchodilator  
328 pulmonary function measures at this locus suggests that the region encompassing *CXCR5* and *HYOU1* plays a  
329 role in lung disease among people with obstructive lung function.

330 Admixture mapping identified 5 genomic regions where variation in genetic ancestry was significantly  
331 associated with phenotypic variation. Locus 1 on chromosome 21 spanned the genes *ADAMTS1* and *ADAMTS5*,  
332 which encode extracellular proteases within the same protein family but with different consequences for  
333 disease. Although both genes have been linked to blood protein levels (Suhre et al., 2017), *ADAMTS1* has been  
334 associated with pre-FVC (Kichaev et al., 2019) and is expressed in arterial, adipose, and lung tissue, while  
335 *ADAMTS5* is not appreciably expressed in the lung (Supplementary Figure 16). Further fine-mapping with  
336 PAINTOR places the most likely causal SNP (rs13615) within the 3' UTR of *ADAMTS1*, suggesting that *ADAMTS1*  
337 may be the gene that is functionally related to lung function. Interestingly, the association of *ADAMTS1* with  
338 pre-FVC (Kichaev et al., 2019) was discovered in a European sample of substantially larger size than our cohort,

339 highlighting the ability of admixture mapping to detect associations in scenarios with low statistical power.  
340 Locus 3, spanning a region on chromosome 19 that was associated with Pre-FEV<sub>1</sub>/FVC, contains the genes  
341 *ZNF557* and *INSR*. *ZNF557* has not been previously associated with any traits, while *INSR* is the well-known  
342 insulin receptor that has been previously associated with childhood onset asthma in our own cohort (White et  
343 al., 2016), as well as blood pressure levels, triglyceride levels, HDL cholesterol levels, and hypothyroidism across  
344 multiple populations (Bentley et al., 2019; Ehret et al., 2016; Kichaev et al., 2019; Klarin et al., 2018). Post-FVC  
345 showed two distinct admixture mapping signals. The first region on chromosome 8, which we call Locus 4,  
346 includes the genes *ESRP1*, *INTS8*, *TP53INP1* and *NDUFA6* was previously associated with type II diabetes and  
347 eosinophil counts (Kichaev et al., 2019; Mahajan et al., 2018). The second region, Locus 5, spans *EGLN3* and  
348 *SNX6*, both of which show previous associations with blood phenotypes such as blood pressure and hematocrit  
349 levels (Astle et al., 2016; Evangelou et al., 2018).

350 Overall, evaluation of our GWAS and admixture mapping lung function results suggests that genetics of this  
351 trait underlies some pleiotropy observed across pulmonary, hematological, cardiovascular, and obesity-related  
352 traits. Such pleiotropy has been observed in UK Biobank participants: as lung function decreases, BMI and type  
353 II diabetes incidence increases, as well as levels of eosinophils and neutrophils, both of which are common  
354 biomarkers for allergic disease (Supplementary Figure 25)(McInnes et al., 2019; Stanford Global Biobank  
355 Engine, 2020). The link between obesity and lung function is particularly interesting since obesity is a known  
356 asthma comorbidity, and lung function may play a role in obese asthma (Baffi et al., 2015)(Gruchala-  
357 Niedoszytko et al., 2015). Our findings suggest that genetically-based differences in lung function may provide  
358 a link between obesity and asthma.

359 It is curious that the regions identified by admixture mapping and subjected to functional fine-mapping did not  
360 overlap with the statistically significant GWAS loci. We attribute this in part to the different types of information  
361 used by each approach: GWAS analyzes how allelic variation affects a trait, while admixture mapping analyzes  
362 the phenotypic consequences of variation in genetic ancestry. By integrating GWAS summary statistics with loci



363 identified via admixture mapping, we found that three of the admixture mapping-based loci -- *ADAMTS1*,  
364 *THAP6*, and *EGLN3* -- had evidence of causal effects. Each of the sentinel SNPs tagging these genes showed a  
365 notable difference in ancestral allele frequency: populations of African descent had either the highest or the  
366 lowest minor allele frequency among all global populations, likely the result of admixture mapping prioritizing  
367 loci that varied by genetic ancestry. None of these loci have been previously associated with lung traits,  
368 highlighting the strength of our integrative analysis. The association with *EGLN3* is particularly curious since it  
369 has been previously associated with a variety of traits, including heart rate response to beta-blocker therapy  
370 (Shahin et al., 2018). Short-acting beta-2 agonists such as albuterol selectively target beta-2 receptors in the  
371 lungs, while the first-generation beta-blockers taken for cardiac conditions bind to both beta-1 and beta-2  
372 receptors, affecting the heart as well the lungs. Bronchospasm and FEV<sub>1</sub> reduction are clinically significant side  
373 effects of first-generation beta-1 selective and nonselective beta-blockers for cardiac conditions. Consequently,  
374 these non-selective beta-blockers must be initiated with caution and close monitoring in patients with asthma  
375 (Christiansen & Zuraw, 2019). Beta-blockers lower blood pressure by reducing heart rate and cardiac  
376 contractility and are less effective in people with high levels of African genetic ancestry (Brewster & Seedat,  
377 2013; Whelton et al., 2018). It has been previously observed that African Americans with asthma demonstrate  
378 lower bronchodilator drug response than European Americans (Blake et al., 2008), suggesting a possible  
379 pharmacological interaction between beta-2 receptors and African ancestry. Furthermore, *EGLN3* is strongly  
380 expressed in cardiac tissue, suggesting that *EGLN3* could possibly influence Post-FVC through cardiac  
381 phenotypes (Supplementary Figure 24). Further functional studies are required to elucidate the role of *EGLN3*  
382 on lung function and bronchodilator drug response.

383 Our integrative analysis approach leverages available functional annotations and genetic ancestry estimates in  
384 the absence of molecular data to yield some promise for discovery of novel loci. Our study is limited to three  
385 tiers – genotypes, genetic ancestry, and functional annotations – and makes use of gene expression results  
386 from GTEx v8. However, it does not directly incorporate any transcriptomic, metabolomic, proteomic, or

387 methylomic information. As large multi-omic datasets from NHLBI TOPMed, UK Biobank, and the NIH Million  
388 Veterans Program become available, the need for integrative genomic approaches to studying complex  
389 diseases will increase. Future multi-omic models of complex diseases, including obstructive lung function  
390 disorders, may deliver on the promise of precision medicine and provide actionable clinical translation of  
391 biomedical and pharmacogenomic insights into novel therapies.

## 392 **Acknowledgements**

393 This work was supported in part by the Sandler Family Foundation, the American Asthma Foundation, the RWJF  
394 Amos Medical Faculty Development Program, the Harry Wm. and Diana V. Hind Distinguished Professor in  
395 Pharmaceutical Sciences II, the National Heart, Lung, and Blood Institute (NHLBI) grants R01HL117004,  
396 R01HL128439, R01HL135156, X01HL134589, R01HL141992, R01HL104608, R01HL141845, and U01HL138626,  
397 the National Human Genome Research Institute (NHGRI) grants U01HG007419 and U01HG009080, the National  
398 Institute of Environmental Health Sciences grants R01ES015794, R21ES24844, the Eunice Kennedy Shriver  
399 National Institute of Child Health and Human Development (NICHD) grant R01HD085993, the National Institute  
400 on Minority Health and Health Disparities (NIMHD) grants P60MD006902, R01MD010443, RL5GM118984,  
401 R56MD013312, and R56MD013312, and the Tobacco-Related Disease Research Program under Award  
402 Numbers 24RT-0025 and 27IR-0030. Research reported in this article was funded by the National Institutes of  
403 Health Common Fund and Office of Scientific Workforce Diversity under three linked awards RL5GM118984,  
404 TL4GM118986, 1UL1GM118985 administered by the National Institute of General Medical Sciences (NIGMS).

405 The authors wish to acknowledge the following SAGE co-investigators for subject recruitment, sample  
406 processing and quality control: Luisa N. Borrell, DDS, PhD, Emerita Brigino-Buenaventura, MD, Adam Davis, MA,  
407 MPH, Michael A. LeNoir, MD, Kelley Meade, MD, Fred Lurmann, MS and Harold J. Farber, MD, MSPH. The  
408 authors also wish to thank the staff and participants who contributed to the SAGE study.

409 This manuscript uses results and visualization provided by the Stanford Global Biobank Engine. The authors  
410 would like to thank the Rivas Lab for making the resource available.

411 PCG was additionally funded by NHGRI training grant T32 HG000044 to the Department of Genetics at Stanford  
412 University.

413 KLK was additionally supported by NHLBI grant supplement R01HL135156-S1, the UCSF Bakar Computational  
414 Health Sciences Institute, the Gordon and Betty Moore Foundation grant GBMF3834, and the Alfred P. Sloan  
415 Foundation grant 2013-10-27 to UC Berkeley through the Moore-Sloan Data Sciences Environment initiative at  
416 the Berkeley Institute for Data Science (BIDS). The logistical space, technical support, administrative assistance,  
417 and indefatigable good humor of the members and staff at BIDS are gratefully acknowledged.

418 EYL, LSB, and AKL were supported by a National Research Service Award grant T32GM007546 from the NIGMS.

419 MGC was additionally supported by NIH MARC U-STAR grant T34GM008574 at San Francisco State University.

420 MJW was additionally supported by NHLBI grant supplement R01HL117004-S1, an NIGMS Institutional Research  
421 and Academic Career Development Award K12GM081266, and an NHLBI Research Career Development Award  
422 K01HL140218.

## 423 **Author Contributions**

424 PCG, KLK, and MJW designed the study. SSO, SS, CE, and EGB recruited study subjects and generated the data.  
425 ACYM, JRE, DU, and SH cleaned and organized the data and provided analytic support. PCG, KLK, EYL, OR, MGC,  
426 and MJW performed the analysis. AKL and LSB provided clinical pharmacological expertise for interpretation of  
427 results. EGB and BEH funded the study. EGB supervised all recruitment. All authors contributed to manuscript  
428 writing and editing.

## 429 **Conflicts of Interest**

430 The authors declare no competing financial interests.

## 431 **References**

- 432 Alexander, D. H., Novembre, J., & Lange, K. (2009). Fast model-based estimation of ancestry in unrelated  
433 individuals. *Genome Research*, *19*(9), 1655–1664. <https://doi.org/10.1101/gr.094052.109>
- 434 Asthma and Allergy Foundation of America. (2019). *Asthma Diagnosis*. [https://www.aafa.org/lung-function-](https://www.aafa.org/lung-function-tests-diagnose-asthma/)  
435 [tests-diagnose-asthma/](https://www.aafa.org/lung-function-tests-diagnose-asthma/)
- 436 Astle, W. J., Elding, H., Jiang, T., Allen, D., Ruklisa, D., Mann, A. L., Mead, D., Bouman, H., Riveros-Mckay,  
437 F., Kostadima, M. A., Lambourne, J. J., Sivapalaratnam, S., Downes, K., Kundu, K., Bomba, L.,  
438 Berentsen, K., Bradley, J. R., Daugherty, L. C., Delaneau, O., ... Soranzo, N. (2016). The Allelic  
439 Landscape of Human Blood Cell Trait Variation and Links to Common Complex Disease. *Cell*, *167*(5),  
440 1415-1429.e19. <https://doi.org/10.1016/j.cell.2016.10.042>
- 441 Baffi, C. W., Winnica, D. E., & Holguin, F. (2015). Asthma and obesity: Mechanisms and clinical implications.  
442 *Asthma Research and Practice*, *1*. <https://doi.org/10.1186/s40733-015-0001-7>
- 443 Baharian, S., Barakatt, M., Gignoux, C. R., Shringarpure, S., Errington, J., Blot, W. J., Bustamante, C. D.,  
444 Kenny, E. E., Williams, S. M., Aldrich, M. C., & Gravel, S. (2016). The Great Migration and African-  
445 American Genomic Diversity. *PLOS Genetics*, *12*(5), e1006059.  
446 <https://doi.org/10.1371/journal.pgen.1006059>
- 447 Barlow, S. E. (2007). Expert Committee Recommendations Regarding the Prevention, Assessment, and  
448 Treatment of Child and Adolescent Overweight and Obesity: Summary Report. *Pediatrics*,  
449 *120*(Supplement 4), S164–S192. <https://doi.org/10.1542/peds.2007-2329C>
- 450 Bentley, A. R., Sung, Y. J., Brown, M. R., Winkler, T. W., Kraja, A. T., Ntalla, I., Schwander, K., Chasman, D.  
451 I., Lim, E., Deng, X., Guo, X., Liu, J., Lu, Y., Cheng, C.-Y., Sim, X., Vojinovic, D., Huffman, J. E.,  
452 Musani, S. K., Li, C., ... Cupples, L. A. (2019). Multi-ancestry genome-wide gene-smoking interaction  
453 study of 387,272 individuals identifies new loci associated with serum lipids. *Nature Genetics*, *51*(4),  
454 636–648. <https://doi.org/10.1038/s41588-019-0378-y>

- 455 Binder, R. E., Mitchell, C. A., Schoenberg, J. B., & Bouhuys, A. (1976). Lung Function among Black and White  
456 Children. *American Review of Respiratory Disease*, 114(5), 955–959.  
457 <https://doi.org/10.1164/arrd.1976.114.5.955>
- 458 Blake, K., Madabushi, R., Derendorf, H., & Lima, J. (2008). Population pharmacodynamic model of  
459 bronchodilator response to inhaled albuterol in children and adults with asthma. *Chest*, 134(5), 981–  
460 989. <https://doi.org/10.1378/chest.07-2991>
- 461 Borrell, L. N., Nguyen, E. A., Roth, L. A., Oh, S. S., Tcheurekdjian, H., Sen, S., Davis, A., Farber, H. J., Avila,  
462 P. C., Brigino-Buenaventura, E., LeNoir, M. A., Lurmann, F., Meade, K., Serebrisky, D., Rodriguez-  
463 Cintron, W., Kumar, R., Rodriguez-Santana, J. R., Thyne, S. M., & Burchard, E. G. (2013). Childhood  
464 Obesity and Asthma Control in the GALA II and SAGE II Studies. *American Journal of Respiratory and  
465 Critical Care Medicine*, 187(7), 697–702. <https://doi.org/10.1164/rccm.201211-2116OC>
- 466 Braun, L. (2015). Race, ethnicity and lung function: A brief history. *Canadian Journal of Respiratory Therapy:  
467 CJRT = Revue Canadienne de La Therapie Respiratoire: RCTR*, 51(4), 99–101.
- 468 Brehm, J. M., Man Tse, S., Croteau-Chonka, D. C., Forno, E., Litonjua, A. A., Raby, B. A., Chen, W., Yan, Q.,  
469 Boutaoui, N., Acosta-Pérez, E., Avila, L., Weiss, S. T., Soto-Quiros, M., Cloutier, M. M., Hu, D., Pino-  
470 Yanes, M., Wenzel, S. E., Spear, M. L., Kolls, J. K., ... Celedón, J. C. (2015). A Genome-Wide  
471 Association Study of Post-bronchodilator Lung Function in Children with Asthma. *American Journal of  
472 Respiratory and Critical Care Medicine*, 192(5), 634–637. <https://doi.org/10.1164/rccm.201501-0047LE>
- 473 Brewster, L. M., & Seedat, Y. K. (2013). Why do hypertensive patients of African ancestry respond better to  
474 calcium blockers and diuretics than to ACE inhibitors and  $\beta$ -adrenergic blockers? A systematic review.  
475 *BMC Medicine*, 11, 141. <https://doi.org/10.1186/1741-7015-11-141>
- 476 Buniello, A., MacArthur, J. A. L., Cerezo, M., Harris, L. W., Hayhurst, J., Malangone, C., McMahon, A.,  
477 Morales, J., Mountjoy, E., Sollis, E., Suveges, D., Vrousitou, O., Whetzel, P. L., Amode, R., Guillen, J.  
478 A., Riat, H. S., Trevanion, S. J., Hall, P., Junkins, H., ... Parkinson, H. (2019). The NHGRI-EBI GWAS  
479 Catalog of published genome-wide association studies, targeted arrays and summary statistics 2019.  
480 *Nucleic Acids Research*, 47(D1), D1005–D1012. <https://doi.org/10.1093/nar/gky1120>
- 481 Burchard, E. G. (2014). Medical research: Missing patients. *Nature News*, 513(7518), 301.  
482 <https://doi.org/10.1038/513301a>

- 483 Bustamante, C. D., Burchard, E. G., & De la Vega, F. M. (2011). Genomics for the world. *Nature*, *475*(7355),  
484 163–165. <https://doi.org/10.1038/475163a>
- 485 Calaway, R., Corporation, M., Weston, S., & Tenenbaum, D. (2018). *doParallel: Foreach Parallel Adaptor for*  
486 *the “parallel” Package* (Version 1.0.14) [Computer software]. [https://CRAN.R-](https://CRAN.R-project.org/package=doParallel)  
487 [project.org/package=doParallel](https://CRAN.R-project.org/package=doParallel)
- 488 Chang, C. C., Chow, C. C., Tellier, L. C., Vattikuti, S., Purcell, S. M., & Lee, J. J. (2015). Second-generation  
489 PLINK: Rising to the challenge of larger and richer datasets. *GigaScience*, *4*(1), 7.  
490 <https://doi.org/10.1186/s13742-015-0047-8>
- 491 Christiansen, S. C., & Zuraw, B. L. (2019). Treatment of Hypertension in Patients with Asthma. *New England*  
492 *Journal of Medicine*, *381*(11), 1046–1057. <https://doi.org/10.1056/NEJMra1800345>
- 493 Conomos, M. P., Miller, M. B., & Thornton, T. A. (2015). Robust Inference of Population Structure for Ancestry  
494 Prediction and Correction of Stratification in the Presence of Relatedness. *Genetic Epidemiology*,  
495 *39*(4), 276–293. <https://doi.org/10.1002/gepi.21896>
- 496 Conomos, M. P., Reiner, A. P., Weir, B. S., & Thornton, T. A. (2016). Model-free Estimation of Recent Genetic  
497 Relatedness. *The American Journal of Human Genetics*, *98*(1), 127–148.  
498 <https://doi.org/10.1016/j.ajhg.2015.11.022>
- 499 Cote, A. T., Harris, K. C., Panagiotopoulos, C., Sandor, G. G. S., & Devlin, A. M. (2013). Childhood obesity  
500 and cardiovascular dysfunction. *Journal of the American College of Cardiology*, *62*(15), 1309–1319.  
501 <https://doi.org/10.1016/j.jacc.2013.07.042>
- 502 Cunningham, F., Achuthan, P., Akanni, W., Allen, J., Amode, M. R., Armean, I. M., Bennett, R., Bhai, J., Billis,  
503 K., Boddu, S., Cummins, C., Davidson, C., Dodiya, K. J., Gall, A., Girón, C. G., Gil, L., Grego, T.,  
504 Haggerty, L., Haskell, E., ... Flicek, P. (2019). Ensembl 2019. *Nucleic Acids Research*, *47*(D1), D745–  
505 D751. <https://doi.org/10.1093/nar/gky1113>
- 506 Das, S., Forer, L., Schönherr, S., Sidore, C., Locke, A. E., Kwong, A., Vrieze, S. I., Chew, E. Y., Levy, S.,  
507 McGue, M., Schlessinger, D., Stambolian, D., Loh, P.-R., Iacono, W. G., Swaroop, A., Scott, L. J.,  
508 Cucca, F., Kronenberg, F., Boehnke, M., ... Fuchsberger, C. (2016). Next-generation genotype  
509 imputation service and methods. *Nature Genetics*, *48*(10), 1284–1287. <https://doi.org/10.1038/ng.3656>

- 510 Davis, T. L., package.), A. D. (Some documentation and examples ported from the getopt, module.), P. S. F.  
511 (Some documentation from the optparse P., Lianoglou, S., Nikelski, J., Müller, K., Humburg, P.,  
512 FitzJohn, R., & Choi, G. J. (2019). *optparse: Command Line Option Parser* (Version 1.6.2) [Computer  
513 software]. <https://CRAN.R-project.org/package=optparse>
- 514 Demenais, F., Margaritte-Jeannin, P., Barnes, K. C., Cookson, W. O. C., Altmüller, J., Ang, W., Barr, R. G.,  
515 Beaty, T. H., Becker, A. B., Beilby, J., Bisgaard, H., Bjornsdottir, U. S., Bleecker, E., Bønnelykke, K.,  
516 Boomsma, D. I., Bouzigon, E., Brightling, C. E., Brossard, M., Brusselle, G. G., ... Nicolae, D. L.  
517 (2018). Multiancestry association study identifies new asthma risk loci that colocalize with immune-cell  
518 enhancer marks. *Nature Genetics*, *50*(1), 42–53. <https://doi.org/10.1038/s41588-017-0014-7>
- 519 Dowle, M., Srinivasan, A., Gorecki, J., Chirico, M., Stetsenko, P., Short, T., Lianoglou, S., Antonyan, E.,  
520 Bonsch, M., Parsonage, H., Ritchie, S., Ren, K., Tan, X., Saporta, R., Seiskari, O., Dong, X., Lang, M.,  
521 Iwasaki, W., Wenchel, S., ... @marc-outins. (2019). *data.table: Extension of “data.frame”* (Version  
522 1.12.2) [Computer software]. <https://CRAN.R-project.org/package=data.table>
- 523 Ehret, G. B., Ferreira, T., Chasman, D. I., Jackson, A. U., Schmidt, E. M., Johnson, T., Thorleifsson, G., Luan,  
524 J., Donnelly, L. A., Kanoni, S., Petersen, A.-K., Pihur, V., Strawbridge, R. J., Shungin, D., Hughes, M.  
525 F., Meirelles, O., Kaakinen, M., Bouatia-Naji, N., Kristiansson, K., ... Munroe, P. B. (2016). The  
526 genetics of blood pressure regulation and its target organs from association studies in 342,415  
527 individuals. *Nature Genetics*, *48*(10), 1171–1184. <https://doi.org/10.1038/ng.3667>
- 528 ENCODE Project Consortium. (2012). An integrated encyclopedia of DNA elements in the human genome.  
529 *Nature*, *489*(7414), 57–74. <https://doi.org/10.1038/nature11247>
- 530 Evangelou, E., Warren, H. R., Mosen-Ansorena, D., Mifsud, B., Pazoki, R., Gao, H., Ntritsos, G., Dimou, N.,  
531 Cabrera, C. P., Karaman, I., Ng, F. L., Evangelou, M., Witkowska, K., Tzanis, E., Hellwege, J. N., Giri,  
532 A., Velez Edwards, D. R., Sun, Y. V., Cho, K., ... Million Veteran Program. (2018). Genetic analysis of  
533 over 1 million people identifies 535 new loci associated with blood pressure traits. *Nature Genetics*,  
534 *50*(10), 1412–1425. <https://doi.org/10.1038/s41588-018-0205-x>
- 535 Fagerberg, L., Hallström, B. M., Oksvold, P., Kampf, C., Djureinovic, D., Odeberg, J., Habuka, M.,  
536 Tahmasebpoor, S., Danielsson, A., Edlund, K., Asplund, A., Sjöstedt, E., Lundberg, E., Szgyarto, C.  
537 A.-K., Skogs, M., Takanen, J. O., Berling, H., Tegel, H., Mulder, J., ... Uhlén, M. (2014). Analysis of the

538 human tissue-specific expression by genome-wide integration of transcriptomics and antibody-based  
539 proteomics. *Molecular & Cellular Proteomics: MCP*, 13(2), 397–406.  
540 <https://doi.org/10.1074/mcp.M113.035600>

541 Féjerman, L., Chen, G. K., Eng, C., Huntsman, S., Hu, D., Williams, A., Pasaniuc, B., John, E. M., Via, M.,  
542 Gignoux, C., Ingles, S., Monroe, K. R., Kolonel, L. N., Torres-Mejía, G., Pérez-Stable, E. J., Burchard,  
543 E. G., Henderson, B. E., Haiman, C. A., & Ziv, E. (2012). Admixture mapping identifies a locus on 6q25  
544 associated with breast cancer risk in US Latinas. *Human Molecular Genetics*, 21(8), 1907–1917.  
545 <https://doi.org/10.1093/hmg/ddr617>

546 Ferreira, M. A. R., Mathur, R., Vonk, J. M., Szwajda, A., Brumpton, B., Granell, R., Brew, B. K., Ulleamar, V.,  
547 Lu, Y., Jiang, Y., 23andMe Research Team, eQTLGen Consortium, BIOS Consortium, Magnusson, P.  
548 K. E., Karlsson, R., Hinds, D. A., Paternoster, L., Koppelman, G. H., & Almqvist, C. (2019). Genetic  
549 Architectures of Childhood- and Adult-Onset Asthma Are Partly Distinct. *American Journal of Human*  
550 *Genetics*, 104(4), 665–684. <https://doi.org/10.1016/j.ajhg.2019.02.022>

551 Ferreira, M. A., Vonk, J. M., Baurecht, H., Marenholz, I., Tian, C., Hoffman, J. D., Helmer, Q., Tillander, A.,  
552 Ulleamar, V., van Dongen, J., Lu, Y., Rüschenhoff, F., Esparza-Gordillo, J., Medway, C. W., Mountjoy,  
553 E., Burrows, K., Hummel, O., Grosche, S., Brumpton, B. M., ... Paternoster, L. (2017). Shared genetic  
554 origin of asthma, hay fever and eczema elucidates allergic disease biology. *Nature Genetics*, 49(12),  
555 1752–1757. <https://doi.org/10.1038/ng.3985>

556 Fingerlin, T. E., Murphy, E., Zhang, W., Peljto, A. L., Brown, K. K., Steele, M. P., Loyd, J. E., Cosgrove, G. P.,  
557 Lynch, D., Groshong, S., Collard, H. R., Wolters, P. J., Bradford, W. Z., Kossen, K., Seiwert, S. D., du  
558 Bois, R. M., Garcia, C. K., Devine, M. S., Gudmundsson, G., ... Schwartz, D. A. (2013). Genome-wide  
559 association study identifies multiple susceptibility loci for pulmonary fibrosis. *Nature Genetics*, 45(6),  
560 613–620. <https://doi.org/10.1038/ng.2609>

561 Giri, A., Hellwege, J. N., Keaton, J. M., Park, J., Qiu, C., Warren, H. R., Torstenson, E. S., Kovesdy, C. P.,  
562 Sun, Y. V., Wilson, O. D., Robinson-Cohen, C., Roumie, C. L., Chung, C. P., Birdwell, K. A.,  
563 Damrauer, S. M., DuVall, S. L., Klarin, D., Cho, K., Wang, Y., ... Edwards, T. L. (2019). Trans-ethnic  
564 association study of blood pressure determinants in over 750,000 individuals. *Nature Genetics*, 51(1),  
565 51–62. <https://doi.org/10.1038/s41588-018-0303-9>



- 566 Glindmeyer, H. W., Lefante, J. J., McColloster, C., Jones, R. N., & Weill, H. (1995). Blue-collar normative  
567 spirometric values for Caucasian and African-American men and women aged 18 to 65. *American*  
568 *Journal of Respiratory and Critical Care Medicine*, 151(2 Pt 1), 412–422.  
569 <https://doi.org/10.1164/ajrccm.151.2.7842200>
- 570 Gogarten, S. M., Sofer, T., Chen, H., Yu, C., Brody, J. A., Thornton, T. A., Rice, K. M., & Conomos, M. P.  
571 (2019). Genetic association testing using the GENESIS R/Bioconductor package. *Bioinformatics*.  
572 <https://doi.org/10.1093/bioinformatics/btz567>
- 573 Gruchała-Niedoszytko, M., Niedoszytko, M., Sanjabi, B., van der Vlies, P., Niedoszytko, P., Jassem, E., &  
574 Małgorzewicz, S. (2015). Analysis of the differences in whole-genome expression related to asthma  
575 and obesity. *Polskie Archiwum Medycyny Wewnętrznej*, 125(10), 722–730.  
576 <https://doi.org/10.20452/pamw.3109>
- 577 Hankinson, J. L., Odencrantz, J. R., & Fedan, K. B. (1999). Spirometric Reference Values from a Sample of  
578 the General U.S. Population. *American Journal of Respiratory and Critical Care Medicine*, 159(1), 179–  
579 187. <https://doi.org/10.1164/ajrccm.159.1.9712108>
- 580 Hardin, M., Cho, M. H., McDonald, M.-L., Wan, E., Lomas, D. A., Coxson, H. O., MacNee, W., Vestbo, J.,  
581 Yates, J. C., Agusti, A., Calverley, P. M. A., Celli, B., Crim, C., Rennard, S., Wouters, E., Bakke, P.,  
582 Bhatt, S. P., Kim, V., Ramsdell, J., ... COPDGene Investigators—clinical centers. (2016). A genome-  
583 wide analysis of the response to inhaled  $\beta$ 2-agonists in chronic obstructive pulmonary disease. *The*  
584 *Pharmacogenomics Journal*, 16(4), 326–335. <https://doi.org/10.1038/tpj.2015.65>
- 585 Harik-Khan, R. I., Muller, D. C., & Wise, R. A. (2004). Racial difference in lung function in African-American  
586 and White children: Effect of anthropometric, socioeconomic, nutritional, and environmental factors.  
587 *American Journal of Epidemiology*, 160(9), 893–900. <https://doi.org/10.1093/aje/kwh297>
- 588 Heit, J. A., Armasu, S. M., McCauley, B. M., Kullo, I. J., Sicotte, H., Pathak, J., Chute, C. G., Gottesman, O.,  
589 Bottinger, E. P., Denny, J. C., Roden, D. M., Li, R., Ritchie, M. D., & de Andrade, M. (2017).  
590 Identification of unique venous thromboembolism-susceptibility variants in African-Americans.  
591 *Thrombosis and Haemostasis*, 117(4), 758–768. <https://doi.org/10.1160/TH16-08-0652>
- 592 Hernandez, W., Gamazon, E. R., Smithberger, E., O'Brien, T. J., Harralson, A. F., Tuck, M., Barbour, A.,  
593 Kittles, R. A., Cavallari, L. H., & Perera, M. A. (2016). Novel genetic predictors of venous

- 594 thromboembolism risk in African Americans. *Blood*, 127(15), 1923–1929. <https://doi.org/10.1182/blood->  
595 2015-09-668525
- 596 Hinrichs, A. S., Karolchik, D., Baertsch, R., Barber, G. P., Bejerano, G., Clawson, H., Diekhans, M., Furey, T.  
597 S., Harte, R. A., Hsu, F., Hillman-Jackson, J., Kuhn, R. M., Pedersen, J. S., Pohl, A., Raney, B. J.,  
598 Rosenbloom, K. R., Siepel, A., Smith, K. E., Sugnet, C. W., ... Kent, W. J. (2006). The UCSC Genome  
599 Browser Database: Update 2006. *Nucleic Acids Research*, 34(Database issue), D590–D598.  
600 <https://doi.org/10.1093/nar/gkj144>
- 601 Hsi, B. P., Hsu, K. H. K., & Jenkins, D. E. (1983). Ventilatory functions of normal children and young adults:  
602 Mexican-American, white, and black. III. Sitting height as a predictor. *The Journal of Pediatrics*, 102(6),  
603 860–865. [https://doi.org/10.1016/S0022-3476\(83\)80012-2](https://doi.org/10.1016/S0022-3476(83)80012-2)
- 604 Johansson, Å., Rask-Andersen, M., Karlsson, T., & Ek, W. E. (2019). Genome-wide association analysis of  
605 350 000 Caucasians from the UK Biobank identifies novel loci for asthma, hay fever and eczema.  
606 *Human Molecular Genetics*, 28(23), 4022–4041. <https://doi.org/10.1093/hmg/ddz175>
- 607 John Tukey. (1977). *Exploratory data analysis*. Addison-Wesley.
- 608 Karczewski, K. J., Francioli, L. C., Tiao, G., Cummings, B. B., Alföldi, J., Wang, Q., Collins, R. L., Laricchia, K.  
609 M., Ganna, A., Birnbaum, D. P., Gauthier, L. D., Brand, H., Solomonson, M., Watts, N. A., Rhodes, D.,  
610 Singer-Berk, M., England, E. M., Seaby, E. G., Kosmicki, J. A., ... MacArthur, D. G. (2019). Variation  
611 across 141,456 human exomes and genomes reveals the spectrum of loss-of-function intolerance  
612 across human protein-coding genes. *BioRxiv*, 531210. <https://doi.org/10.1101/531210>
- 613 Kichaev, G. (2017). *PAINTOR v3.0*. [https://github.com/gkichaev/PAINTOR\\_V3.0](https://github.com/gkichaev/PAINTOR_V3.0)
- 614 Kichaev, G., Bhatia, G., Loh, P.-R., Gazal, S., Burch, K., Freund, M. K., Schoech, A., Pasaniuc, B., & Price, A.  
615 L. (2019). Leveraging Polygenic Functional Enrichment to Improve GWAS Power. *American Journal of*  
616 *Human Genetics*, 104(1), 65–75. <https://doi.org/10.1016/j.ajhg.2018.11.008>
- 617 Kichaev, G., Yang, W.-Y., Lindstrom, S., Hormozdiari, F., Eskin, E., Price, A. L., Kraft, P., & Pasaniuc, B.  
618 (2014). Integrating Functional Data to Prioritize Causal Variants in Statistical Fine-Mapping Studies.  
619 *PLOS Genetics*, 10(10), e1004722. <https://doi.org/10.1371/journal.pgen.1004722>
- 620 Klarin, D., Damrauer, S. M., Cho, K., Sun, Y. V., Teslovich, T. M., Honerlaw, J., Gagnon, D. R., DuVall, S. L.,  
621 Li, J., Peloso, G. M., Chaffin, M., Small, A. M., Huang, J., Tang, H., Lynch, J. A., Ho, Y.-L., Liu, D. J.,

- 622 Emdin, C. A., Li, A. H., ... Assimes, T. L. (2018). Genetics of blood lipids among ~300,000 multi-ethnic  
623 participants of the Million Veteran Program. *Nature Genetics*, 50(11), 1514–1523.  
624 <https://doi.org/10.1038/s41588-018-0222-9>
- 625 Kumar, R., Seibold, M. A., Aldrich, M. C., Williams, L. K., Reiner, A. P., Colangelo, L., Galanter, J., Gignoux,  
626 C., Hu, D., Sen, S., Choudhry, S., Peterson, E. L., Rodriguez-Santana, J., Rodriguez-Cintron, W.,  
627 Nalls, M. A., Leak, T. S., O’Meara, E., Meibohm, B., Kritchevsky, S. B., ... Burchard, E. G. (2010).  
628 Genetic ancestry in lung-function predictions. *The New England Journal of Medicine*, 363(4), 321–330.  
629 <https://doi.org/10.1056/NEJMoa0907897>
- 630 Laufer, V. A., Tiwari, H. K., Reynolds, R. J., Danila, M. I., Wang, J., Edberg, J. C., Kimberly, R. P., Kottyan, L.  
631 C., Harley, J. B., Mikuls, T. R., Gregersen, P. K., Absher, D. M., Langefeld, C. D., Arnett, D. K., &  
632 Bridges, S. L. (2019). Genetic influences on susceptibility to rheumatoid arthritis in African-Americans.  
633 *Human Molecular Genetics*, 28(5), 858–874. <https://doi.org/10.1093/hmg/ddy395>
- 634 Lessard, C. J., Li, H., Adrianto, I., Ice, J. A., Rasmussen, A., Grundahl, K. M., Kelly, J. A., Dozmorov, M. G.,  
635 Miceli-Richard, C., Bowman, S., Lester, S., Eriksson, P., Eloranta, M.-L., Brun, J. G., Gøransson, L. G.,  
636 Harboe, E., Guthridge, J. M., Kaufman, K. M., Kvarnström, M., ... Sivils, K. L. (2013). Variants at  
637 multiple loci implicated in both innate and adaptive immune responses are associated with Sjögren’s  
638 syndrome. *Nature Genetics*, 45(11), 1284–1292. <https://doi.org/10.1038/ng.2792>
- 639 Loh, P.-R., Danecek, P., Palamara, P. F., Fuchsberger, C., Reshef, Y. A., Finucane, H. K., Schoenherr, S.,  
640 Forer, L., McCarthy, S., Abecasis, G. R., Durbin, R., & Price, A. L. (2016). Reference-based phasing  
641 using the Haplotype Reference Consortium panel. *Nature Genetics*, 48(11), 1443–1448.  
642 <https://doi.org/10.1038/ng.3679>
- 643 Lutz, S. M., Cho, M. H., Young, K., Hersh, C. P., Castaldi, P. J., McDonald, M.-L., Regan, E., Mattheisen, M.,  
644 DeMeo, D. L., Parker, M., Foreman, M., Make, B. J., Jensen, R. L., Casaburi, R., Lomas, D. A., Bhatt,  
645 S. P., Bakke, P., Gulsvik, A., Crapo, J. D., ... COPDGene Investigators. (2015). A genome-wide  
646 association study identifies risk loci for spirometric measures among smokers of European and African  
647 ancestry. *BMC Genetics*, 16, 138. <https://doi.org/10.1186/s12863-015-0299-4>
- 648 Mahajan, A., Taliun, D., Thurner, M., Robertson, N. R., Torres, J. M., Rayner, N. W., Payne, A. J.,  
649 Steinthorsdottir, V., Scott, R. A., Grarup, N., Cook, J. P., Schmidt, E. M., Wuttke, M., Sarnowski, C.,

- 650 Mägi, R., Nano, J., Gieger, C., Trompet, S., Lecoeur, C., ... McCarthy, M. I. (2018). Fine-mapping type  
651 2 diabetes loci to single-variant resolution using high-density imputation and islet-specific epigenome  
652 maps. *Nature Genetics*, 50(11), 1505–1513. <https://doi.org/10.1038/s41588-018-0241-6>
- 653 Mak, A. C. Y., White, M. J., Eckalbar, W. L., Szpiech, Z. A., Oh, S. S., Pino-Yanes, M., Hu, D., Goddard, P.,  
654 Huntsman, S., Galanter, J., Wu, A. C., Himes, B. E., Germer, S., Vogel, J. M., Bunting, K. L., Eng, C.,  
655 Salazar, S., Keys, K. L., Liberto, J., ... NHLBI Trans-Omics for Precision Medicine (TOPMed)  
656 Consortium. (2018). Whole-Genome Sequencing of Pharmacogenetic Drug Response in Racially  
657 Diverse Children with Asthma. *American Journal of Respiratory and Critical Care Medicine*, 197(12),  
658 1552–1564. <https://doi.org/10.1164/rccm.201712-2529OC>
- 659 Maples, B. K., Gravel, S., Kenny, E. E., & Bustamante, C. D. (2013). RFMix: A Discriminative Modeling  
660 Approach for Rapid and Robust Local-Ancestry Inference. *American Journal of Human Genetics*,  
661 93(2), 278–288. <https://doi.org/10.1016/j.ajhg.2013.06.020>
- 662 Martín-Hernández, E., Rodríguez-García, M. E., Camacho, A., Matilla-Dueñas, A., García-Silva, M. T.,  
663 Quijada-Fraile, P., Corral-Juan, M., Tejada-Palacios, P., de Las Heras, R. S., Arenas, J., Martín, M. A.,  
664 & Martínez-Azorín, F. (2016). New ATP8A2 gene mutations associated with a novel syndrome:  
665 Encephalopathy, intellectual disability, severe hypotonia, chorea and optic atrophy. *Neurogenetics*,  
666 17(4), 259–263. <https://doi.org/10.1007/s10048-016-0496-y>
- 667 McInnes, G., Tanigawa, Y., DeBoever, C., Lavertu, A., Olivieri, J. E., Aguirre, M., & Rivas, M. A. (2019).  
668 Global Biobank Engine: Enabling genotype-phenotype browsing for biobank summary statistics.  
669 *Bioinformatics*, 35(14), 2495–2497. <https://doi.org/10.1093/bioinformatics/bty999>
- 670 Miller, M. R., Crapo, R., Hankinson, J., Brusasco, V., Burgos, F., Casaburi, R., Coates, A., Enright, P., van der  
671 Grinten, C. P. M., Gustafsson, P., Jensen, R., Johnson, D. C., MacIntyre, N., McKay, R., Navajas, D.,  
672 Pedersen, O. F., Pellegrino, R., Viegi, G., Wanger, J., & ATS/ERS Task Force. (2005). General  
673 considerations for lung function testing. *The European Respiratory Journal*, 26(1), 153–161.  
674 <https://doi.org/10.1183/09031936.05.00034505>
- 675 Nishimura, K. K., Galanter, J. M., Roth, L. A., Oh, S. S., Thakur, N., Nguyen, E. A., Thyne, S., Farber, H. J.,  
676 Serebrisky, D., Kumar, R., Brigino-Buenaventura, E., Davis, A., LeNoir, M. A., Meade, K., Rodriguez-  
677 Cintron, W., Avila, P. C., Borrell, L. N., Bibbins-Domingo, K., Rodriguez-Santana, J. R., ... Burchard, E.

- 678 G. (2013). Early-life air pollution and asthma risk in minority children. The GALA II and SAGE II  
679 studies. *American Journal of Respiratory and Critical Care Medicine*, 188(3), 309–318.  
680 <https://doi.org/10.1164/rccm.201302-0264OC>
- 681 Nurmagambetov, T., Kuwahara, R., & Garbe, P. (2018). The Economic Burden of Asthma in the United  
682 States, 2008–2013. *Annals of the American Thoracic Society*, 15(3), 348–356.  
683 <https://doi.org/10.1513/AnnalsATS.201703-259OC>
- 684 Ober, C., & Yao, T.-C. (2011). The Genetics of Asthma and Allergic Disease: A 21st Century Perspective.  
685 *Immunological Reviews*, 242(1), 10–30. <https://doi.org/10.1111/j.1600-065X.2011.01029.x>
- 686 Patterson, N., Price, A. L., & Reich, D. (2006). Population structure and eigenanalysis. *PLoS Genetics*, 2(12),  
687 e190. <https://doi.org/10.1371/journal.pgen.0020190>
- 688 Pellegrino, R., Viegi, G., Brusasco, V., Crapo, R. O., Burgos, F., Casaburi, R., Coates, A., van der Grinten, C.  
689 P. M., Gustafsson, P., Hankinson, J., Jensen, R., Johnson, D. C., MacIntyre, N., McKay, R., Miller, M.  
690 R., Navajas, D., Pedersen, O. F., & Wanger, J. (2005). Interpretative strategies for lung function tests.  
691 *The European Respiratory Journal*, 26(5), 948–968. <https://doi.org/10.1183/09031936.05.00035205>
- 692 Pickrell, J. K., Berisa, T., Liu, J. Z., Séguirel, L., Tung, J. Y., & Hinds, D. A. (2016). Detection and interpretation  
693 of shared genetic influences on 42 human traits. *Nature Genetics*, 48(7), 709–717.  
694 <https://doi.org/10.1038/ng.3570>
- 695 Pino-Yanes, M., Thakur, N., Gignoux, C. R., Galanter, J. M., Roth, L. A., Eng, C., Nishimura, K. K., Oh, S. S.,  
696 Vora, H., Huntsman, S., Nguyen, E. A., Hu, D., Drake, K. A., Conti, D. V., Moreno-Estrada, A.,  
697 Sandoval, K., Winkler, C. A., Borrell, L. N., Lurmann, F., ... Burchard, E. G. (2015). Genetic Ancestry  
698 Influences Asthma Susceptibility and Lung Function Among Latinos. *The Journal of Allergy and*  
699 *Clinical Immunology*, 135(1), 228–235. <https://doi.org/10.1016/j.jaci.2014.07.053>
- 700 Pividori, M., Schoettler, N., Nicolae, D. L., Ober, C., & Im, H. K. (2019). Shared and distinct genetic risk factors  
701 for childhood-onset and adult-onset asthma: Genome-wide and transcriptome-wide studies. *The*  
702 *Lancet. Respiratory Medicine*, 7(6), 509–522. [https://doi.org/10.1016/S2213-2600\(19\)30055-4](https://doi.org/10.1016/S2213-2600(19)30055-4)
- 703 Plummer, M., Best, N., Cowles, K., & Vines, K. (2006). CODA: Convergence Diagnosis and Output Analysis  
704 for MCMC. *R News*, 6(1), 7–11.

- 705 Popejoy, A. B., & Fullerton, S. M. (2016). Genomics is failing on diversity. *Nature*, 538(7624), 161–164.  
706 <https://doi.org/10.1038/538161a>
- 707 Pulit, S. L., Stoneman, C., Morris, A. P., Wood, A. R., Glastonbury, C. A., Tyrrell, J., Yengo, L., Ferreira, T.,  
708 Marouli, E., Ji, Y., Yang, J., Jones, S., Beaumont, R., Croteau-Chonka, D. C., Winkler, T. W.,  
709 Consortium, G., Hattersley, A. T., Loos, R. J. F., Hirschhorn, J. N., ... Lindgren, C. M. (2019). Meta-  
710 analysis of genome-wide association studies for body fat distribution in 694 649 individuals of  
711 European ancestry. *Human Molecular Genetics*, 28(1), 166–174. <https://doi.org/10.1093/hmg/ddy327>
- 712 Quanjer, P. H. (2013). Lung function, race and ethnicity: A conundrum. *European Respiratory Journal*, 41(6),  
713 1249–1251. <https://doi.org/10.1183/09031936.00053913>
- 714 Quanjer, P. H. (2015). Lung function, genetics and socioeconomic conditions. *The European Respiratory*  
715 *Journal*, 45(6), 1529–1533. <https://doi.org/10.1183/09031936.00053115>
- 716 Risch, N., & Merikangas, K. (1996). The Future of Genetic Studies of Complex Human Diseases. *Science*,  
717 273(5281), 1516–1517. <https://doi.org/10.1126/science.273.5281.1516>
- 718 Roadmap Epigenomics Consortium, Kundaje, A., Meuleman, W., Ernst, J., Bilenky, M., Yen, A., Heravi-  
719 Moussavi, A., Kheradpour, P., Zhang, Z., Wang, J., Ziller, M. J., Amin, V., Whitaker, J. W., Schultz, M.  
720 D., Ward, L. D., Sarkar, A., Quon, G., Sandstrom, R. S., Eaton, M. L., ... Kellis, M. (2015). Integrative  
721 analysis of 111 reference human epigenomes. *Nature*, 518(7539), 317–330.  
722 <https://doi.org/10.1038/nature14248>
- 723 Rossiter, C. E., & Weill, H. (1974). Ethnic Differences in Lung Function: Evidence for proportional differences.  
724 *International Journal of Epidemiology*, 3(1), 55–61. <https://doi.org/10.1093/ije/3.1.55>
- 725 Rüeger, S., McDaid, A., & Kutalik, Z. (2018). Evaluation and application of summary statistic imputation to  
726 discover new height-associated loci. *PLoS Genetics*, 14(5), e1007371.  
727 <https://doi.org/10.1371/journal.pgen.1007371>
- 728 Schwartz, J., Katz, S. A., Fegley, R. W., & Tockman, M. S. (1988). Sex and Race Differences in the  
729 Development of Lung Function. *American Review of Respiratory Disease*, 138(6), 1415–1421.  
730 <https://doi.org/10.1164/ajrccm/138.6.1415>
- 731 Shahin, M. H., Conrado, D. J., Gonzalez, D., Gong, Y., Lobmeyer, M. T., Beitelshes, A. L., Boerwinkle, E.,  
732 Gums, J. G., Chapman, A., Turner, S. T., Cooper-DeHoff, R. M., & Johnson, J. A. (2018). Genome-

- 733 Wide Association Approach Identified Novel Genetic Predictors of Heart Rate Response to  $\beta$ -Blockers.  
734 *Journal of the American Heart Association*, 7(5). <https://doi.org/10.1161/JAHA.117.006463>
- 735 Shriner, D. (2013). Overview of Admixture Mapping. *Current Protocols in Human Genetics / Editorial Board*,  
736 *Jonathan L. Haines ... [et Al.]*, CHAPTER, Unit1.23. <https://doi.org/10.1002/0471142905.hg0123s76>
- 737 Smemo, S., Tena, J. J., Kim, K.-H., Gamazon, E. R., Sakabe, N. J., Gómez-Marín, C., Aneas, I., Credidio, F.  
738 L., Sobreira, D. R., Wasserman, N. F., Lee, J. H., Puvindran, V., Tam, D., Shen, M., Son, J. E., Vakili,  
739 N. A., Sung, H.-K., Naranjo, S., Acemel, R. D., ... Nóbrega, M. A. (2014). Obesity-associated variants  
740 within FTO form long-range functional connections with IRX3. *Nature*, 507(7492), 371–375.  
741 <https://doi.org/10.1038/nature13138>
- 742 Spear, M. L., Hu, D., Pino-Yanes, M., Huntsman, S., Eng, C., Levin, A. M., Ortega, V. E., White, M. J.,  
743 McGarry, M. E., Thakur, N., Galanter, J., Mak, A. C. Y., Oh, S. S., Ampleford, E., Peters, S. P., Davis,  
744 A., Kumar, R., Farber, H. J., Meade, K., ... Burchard, E. G. (2019). A Genome-wide Association and  
745 Admixture Mapping Study of Bronchodilator Drug Response in African Americans with Asthma. *The*  
746 *Pharmacogenomics Journal*, 19(3), 249–259. <https://doi.org/10.1038/s41397-018-0042-4>
- 747 Stanford Global Biobank Engine. (2020, March). *Stanford Global Biobank Engine*. Stanford Global Biobank  
748 Engine. <http://gbe.stanford.edu>
- 749 Suhre, K., Arnold, M., Bhagwat, A. M., Cotton, R. J., Engelke, R., Raffler, J., Sarwath, H., Thareja, G., Wahl,  
750 A., DeLisle, R. K., Gold, L., Pezer, M., Lauc, G., El-Din Selim, M. A., Mook-Kanamori, D. O., Al-Dous,  
751 E. K., Mohamoud, Y. A., Malek, J., Strauch, K., ... Graumann, J. (2017). Connecting genetic risk to  
752 disease end points through the human blood plasma proteome. *Nature Communications*, 8, 14357.  
753 <https://doi.org/10.1038/ncomms14357>
- 754 Tange, O. (2018). *GNU Parallel 2018*. Ole Tange. <https://doi.org/10.5281/zenodo.1146014>
- 755 Thakur, N., Oh, S. S., Nguyen, E. A., Martin, M., Roth, L. A., Galanter, J., Gignoux, C. R., Eng, C., Davis, A.,  
756 Meade, K., LeNoir, M. A., Avila, P. C., Farber, H. J., Serebrisky, D., Brigino-Buenaventura, E.,  
757 Rodriguez-Cintron, W., Kumar, R., Williams, L. K., Bibbins-Domingo, K., ... Burchard, E. G. (2013).  
758 Socioeconomic status and childhood asthma in urban minority youths. The GALA II and SAGE II  
759 studies. *American Journal of Respiratory and Critical Care Medicine*, 188(10), 1202–1209.  
760 <https://doi.org/10.1164/rccm.201306-1016OC>

- 761 The 1000 Genomes Project Consortium. (2015). A global reference for human genetic variation. *Nature*,  
762 526(7571), 68–74. <https://doi.org/10.1038/nature15393>
- 763 The Global Asthma Network. (2018). *The Global Asthma Report 2018*.  
764 <http://www.globalasthmareport.org/foreword/summaries.php>
- 765 The International HapMap 3 Consortium. (2010). Integrating common and rare genetic variation in diverse  
766 human populations. *Nature*, 467(7311), 52–58. <https://doi.org/10.1038/nature09298>
- 767 Tsoi, L. C., Spain, S. L., Ellinghaus, E., Stuart, P. E., Capon, F., Knight, J., Tejasvi, T., Kang, H. M., Allen, M.  
768 H., Lambert, S., Stoll, S. W., Weidinger, S., Gudjonsson, J. E., Koks, S., Kingo, K., Esko, T., Das, S.,  
769 Metspalu, A., Weichenthal, M., ... Elder, J. T. (2015). Enhanced meta-analysis and replication studies  
770 identify five new psoriasis susceptibility loci. *Nature Communications*, 6, 7001.  
771 <https://doi.org/10.1038/ncomms8001>
- 772 van Rooij, F. J. A., Qayyum, R., Smith, A. V., Zhou, Y., Trompet, S., Tanaka, T., Keller, M. F., Chang, L.-C.,  
773 Schmidt, H., Yang, M.-L., Chen, M.-H., Hayes, J., Johnson, A. D., Yanek, L. R., Mueller, C., Lange, L.,  
774 Floyd, J. S., Ghanbari, M., Zonderman, A. B., ... Ganesh, S. K. (2017). Genome-wide Trans-ethnic  
775 Meta-analysis Identifies Seven Genetic Loci Influencing Erythrocyte Traits and a Role for RBPMS in  
776 Erythropoiesis. *American Journal of Human Genetics*, 100(1), 51–63.  
777 <https://doi.org/10.1016/j.ajhg.2016.11.016>
- 778 Wanger, J., Clausen, J. L., Coates, A., Pedersen, O. F., Brusasco, V., Burgos, F., Casaburi, R., Crapo, R.,  
779 Enright, P., van der Grinten, C. P. M., Gustafsson, P., Hankinson, J., Jensen, R., Johnson, D.,  
780 Macintyre, N., McKay, R., Miller, M. R., Navajas, D., Pellegrino, R., & Viegi, G. (2005). Standardisation  
781 of the measurement of lung volumes. *The European Respiratory Journal*, 26(3), 511–522.  
782 <https://doi.org/10.1183/09031936.05.00035005>
- 783 Whelton Paul K., Carey Robert M., Aronow Wilbert S., Casey Donald E., Collins Karen J., Dennison  
784 Himmelfarb Cheryl, DePalma Sondra M., Gidding Samuel, Jamerson Kenneth A., Jones Daniel W.,  
785 MacLaughlin Eric J., Muntner Paul, Ovbiagele Bruce, Smith Sidney C., Spencer Crystal C., Stafford  
786 Randall S., Taler Sandra J., Thomas Randal J., Williams Kim A., ... Wright Jackson T. (2018). 2017  
787 ACC/AHA/AAPA/ABC/ACPM/AGS/APhA/ASH/ASPC/NMA/PCNA Guideline for the Prevention,  
788 Detection, Evaluation, and Management of High Blood Pressure in Adults: A Report of the American



- 789 College of Cardiology/American Heart Association Task Force on Clinical Practice Guidelines.  
790 *Hypertension*, 71(6), e13–e115. <https://doi.org/10.1161/HYP.0000000000000065>
- 791 White, M. J., Risse-Adams, O., Goddard, P., Contreras, M. G., Adams, J., Hu, D., Eng, C., Oh, S. S., Davis,  
792 A., Meade, K., Brigino-Buenaventura, E., LeNoir, M. A., Bibbins-Domingo, K., Pino-Yanes, M., &  
793 Burchard, E. G. (2016). Novel genetic risk factors for asthma in African American children: Precision  
794 Medicine and the SAGE II Study. *Immunogenetics*, 68(6–7), 391–400. [https://doi.org/10.1007/s00251-](https://doi.org/10.1007/s00251-016-0914-1)  
795 016-0914-1
- 796 Whitlock, E. P., Williams, S. B., Gold, R., Smith, P. R., & Shipman, S. A. (2005). Screening and interventions  
797 for childhood overweight: A summary of evidence for the US Preventive Services Task Force.  
798 *Pediatrics*, 116(1), e125-144. <https://doi.org/10.1542/peds.2005-0242>
- 799 Wickham, Hadley. (2016). *ggplot2: Elegant Graphics for Data Analysis*. Springer-Verlag New York.  
800 <http://ggplot2.org>
- 801 Wickham, Hadley, & Grolemund, Garrett. (2017). *R for Data Science*. O'Reilly Media, Inc.  
802 <https://r4ds.had.co.nz/>
- 803 Wojcik, G. L., Graff, M., Nishimura, K. K., Tao, R., Haessler, J., Gignoux, C. R., Highland, H. M., Patel, Y. M.,  
804 Sorokin, E. P., Avery, C. L., Belbin, G. M., Bien, S. A., Cheng, I., Cullina, S., Hodonsky, C. J., Hu, Y.,  
805 Huckins, L. M., Jeff, J., Justice, A. E., ... Carlson, C. S. (2019). Genetic analyses of diverse  
806 populations improves discovery for complex traits. *Nature*, 570(7762), 514–518.  
807 <https://doi.org/10.1038/s41586-019-1310-4>
- 808 Wyss, A. B., Sofer, T., Lee, M. K., Terzikhan, N., Nguyen, J. N., Lahousse, L., Latourelle, J. C., Smith, A. V.,  
809 Bartz, T. M., Feitosa, M. F., Gao, W., Ahluwalia, T. S., Tang, W., Oldmeadow, C., Duan, Q., de Jong,  
810 K., Wojczynski, M. K., Wang, X.-Q., Noordam, R., ... London, S. J. (2018). Multiethnic meta-analysis  
811 identifies ancestry-specific and cross-ancestry loci for pulmonary function. *Nature Communications*,  
812 9(1), 1–15. <https://doi.org/10.1038/s41467-018-05369-0>
- 813 Yang, J., Lee, S. H., Goddard, M. E., & Visscher, P. M. (2011). GCTA: A tool for genome-wide complex trait  
814 analysis. *American Journal of Human Genetics*, 88(1), 76–82.  
815 <https://doi.org/10.1016/j.ajhg.2010.11.011>

- 816 Yang, J., Zaitlen, N. A., Goddard, M. E., Visscher, P. M., & Price, A. L. (2014). Advantages and pitfalls in the  
817 application of mixed-model association methods. *Nature Genetics*, *46*(2), 100–106.  
818 <https://doi.org/10.1038/ng.2876>
- 819 Zhu, Y., Yao, S., Iliopoulou, B. P., Han, X., Augustine, M. M., Xu, H., Phennicie, R. T., Flies, S. J., Broadwater,  
820 M., Ruff, W., Taube, J. M., Zheng, L., Luo, L., Zhu, G., Chen, J., & Chen, L. (2013). B7-H5  
821 costimulates human T cells via CD28H. *Nature Communications*, *4*, 2043.  
822 <https://doi.org/10.1038/ncomms3043>
- 823 Zhu, Z., Lee, P. H., Chaffin, M. D., Chung, W., Loh, P.-R., Lu, Q., Christiani, D. C., & Liang, L. (2018). A  
824 genome-wide cross-trait analysis from UK Biobank highlights the shared genetic architecture of  
825 asthma and allergic diseases. *Nature Genetics*, *50*(6), 857–864. [https://doi.org/10.1038/s41588-018-](https://doi.org/10.1038/s41588-018-0121-0)  
826 [0121-0](https://doi.org/10.1038/s41588-018-0121-0)  
827  
828

## 829 Tables and Figures

| Characteristics            | Cases         | Controls      | Total         |
|----------------------------|---------------|---------------|---------------|
| Subjects (n)               | 831           | 272           | 1,103         |
| Age (yr)                   | 14.1 (3.66)   | 16.3 (3.77)   | 14.7 (3.8)    |
| Female (n)                 | 406           | 166           | 572           |
| Height (cm)                | 158 (14.34)   | 162.4 (13.26) | 159.1 (14.2)  |
| African ancestry (%)       | 80.4 (0.1)    | 79.6 (0.1)    | 80.2 (0.1)    |
| Maternal Education (yr)    | 12.4 (1.47)   | 12.2 (1.5)    | 12.3 (1.48)   |
| Obesity status             |               |               |               |
| Obese (n)                  | 276           | 74            | 350           |
| Non-obese (n)              | 555           | 198           | 753           |
| Pre-FEV <sub>1</sub>       | 103 (13.79)   | 98.1 (13.02)  | 99.3 (13.77)  |
| Pre-FVC                    | 103.4 (12.84) | 105.1 (13.09) | 103.8 (12.92) |
| Pre-FEV <sub>1</sub> /FVC  | 95.1 (9.35)   | 98.4 (8.2)    | 95.9 (9.19)   |
| Post-FEV <sub>1</sub>      | 107 (13.44)   | n/a           | n/a           |
| Post-FVC                   | 109 (14.42)   | n/a           | n/a           |
| Post-FEV <sub>1</sub> /FVC | 99 (7.83)     | n/a           | n/a           |

830 Table 1: Summary statistics of phenotypes and covariates from the SAGE cohort. Displayed numbers are either counts (n) or averages  
831 followed by standard errors in parentheses. Units are listed where appropriate. An “n/a” appears where measurements taken on  
832 cases only.

833

### Manhattan Plots

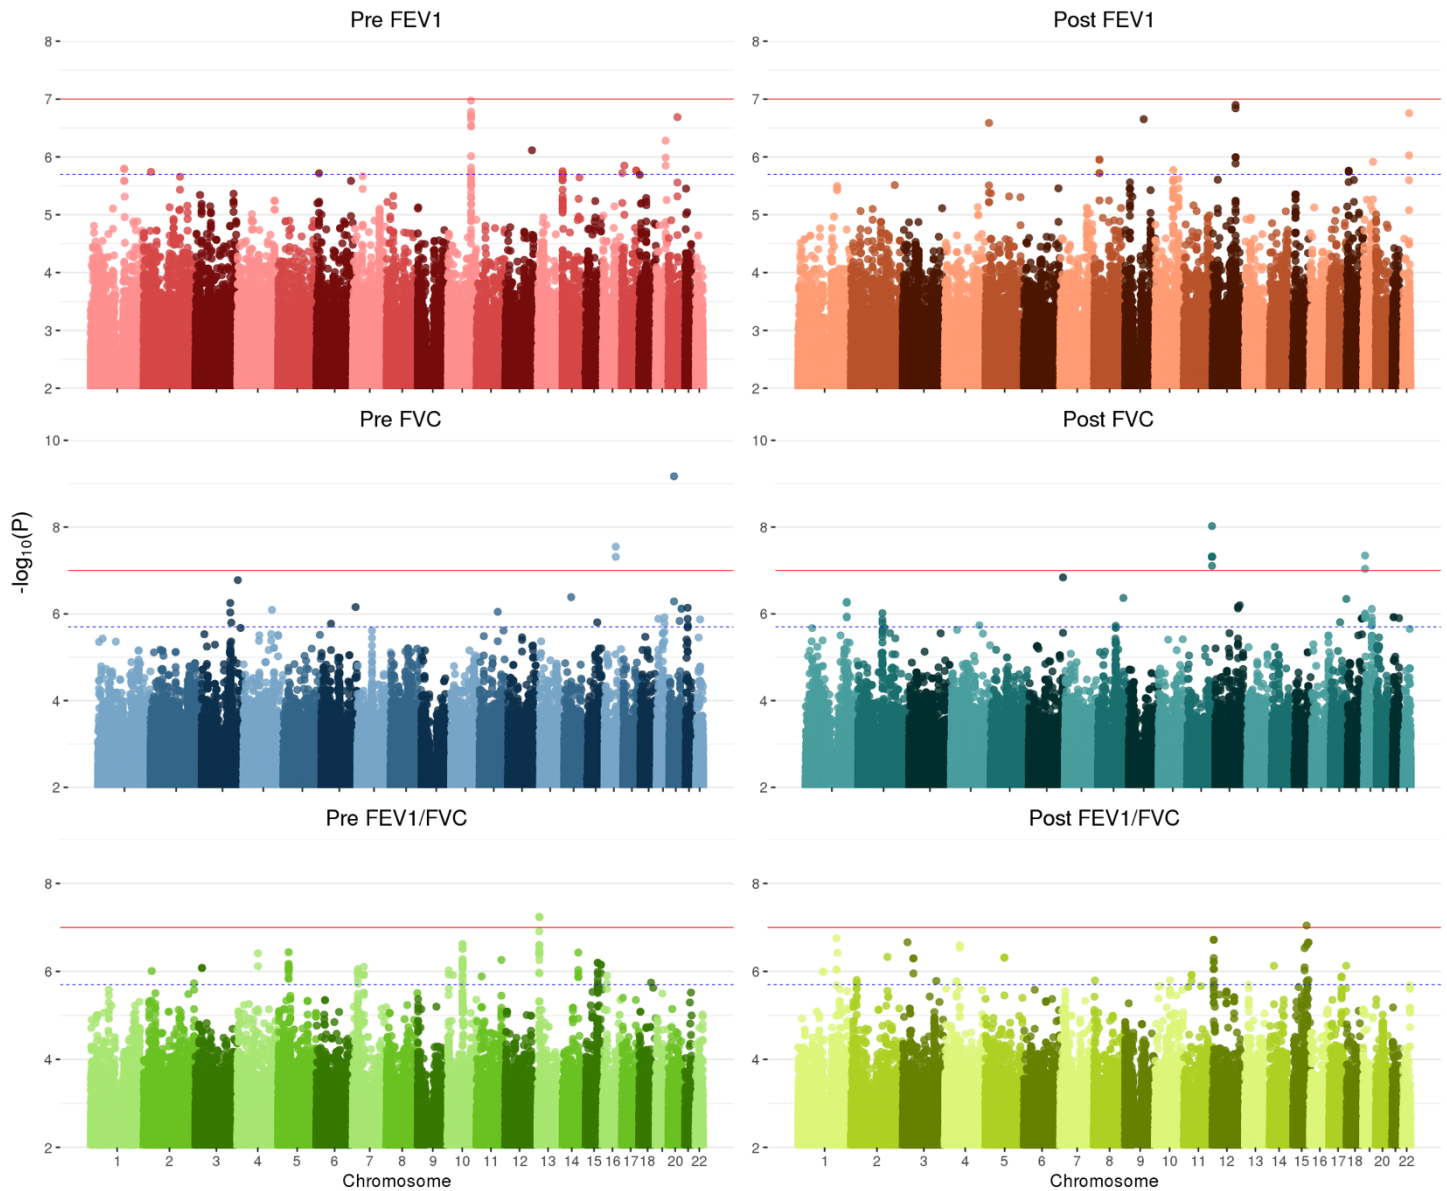

834

835 Figure 1: Manhattan plots summarizing GWAS  $p$ -values for all six lung function phenotypes. The solid red line denotes genome-wide  
836 significance ( $p$ -value  $< 9.95 \times 10^{-8}$ ), while the dashed blue line marks the suggestive threshold ( $p$ -value  $< 1.99 \times 10^{-6}$ ), per CODA  
837 calculations. Variants with a  $p$ -value greater than 0.05 were deemed uninformative and therefore not plotted.

838

| Phenotype     | Chr | Position (bp) | A1 | A2 | MAF   | $\beta$  | Std Err | P-value                | Genes                    |
|---------------|-----|---------------|----|----|-------|----------|---------|------------------------|--------------------------|
| Post-FEV1/FVC | 15  | 85798401      | A  | G  | 0.018 | -6.7846  | 1.27    | $9.05 \times 10^{-8}$  | <i>ADAMTS74P, AKAP13</i> |
| Post-FVC      | 11  | 118932913     | C  | T  | 0.010 | 18.9094  | 3.29    | $9.47 \times 10^{-9}$  | <i>CXCR5, HYOU1</i>      |
| Post-FVC      | 11  | 118902275     | C  | T  | 0.010 | 17.9775  | 3.29    | $4.83 \times 10^{-8}$  | <i>CXCR5, HYOU1</i>      |
| Post-FVC      | 11  | 118905095     | A  | G  | 0.010 | 17.9775  | 3.29    | $4.83 \times 10^{-8}$  | <i>CXCR5, HYOU1</i>      |
| Post-FVC      | 11  | 118905316     | T  | C  | 0.010 | 17.9775  | 3.29    | $4.83 \times 10^{-8}$  | <i>CXCR5, HYOU1</i>      |
| Post-FVC      | 11  | 118906065     | A  | G  | 0.010 | 17.9775  | 3.29    | $4.83 \times 10^{-8}$  | <i>CXCR5, HYOU1</i>      |
| Post-FVC      | 11  | 118906240     | T  | C  | 0.010 | 17.9775  | 3.29    | $4.83 \times 10^{-8}$  | <i>CXCR5, HYOU1</i>      |
| Post-FVC      | 11  | 118906745     | C  | G  | 0.010 | 17.9775  | 3.29    | $4.83 \times 10^{-8}$  | <i>CXCR5, HYOU1</i>      |
| Post-FVC      | 11  | 118907923     | G  | T  | 0.010 | 18.2978  | 3.41    | $7.85 \times 10^{-8}$  | <i>CXCR5, HYOU1</i>      |
| Post-FVC      | 19  | 4289259       | T  | C  | 0.106 | 5.1672   | 0.967   | $9.21 \times 10^{-8}$  | <i>TMIGD2, SHD</i>       |
| Post-FVC      | 19  | 4291817       | T  | C  | 0.111 | 5.2674   | 0.963   | $4.52 \times 10^{-8}$  | <i>TMIGD2, SHD</i>       |
| Pre-FEV1/FVC  | 13  | 26235394      | G  | A  | 0.010 | -10.5334 | 1.94    | $5.80 \times 10^{-8}$  | <i>ATP8A2</i>            |
| Pre-FEV1/FVC  | 13  | 26247080      | G  | A  | 0.010 | -10.5334 | 1.94    | $5.80 \times 10^{-8}$  | <i>ATP8A2</i>            |
| Pre-FEV1/FVC  | 13  | 26262378      | T  | G  | 0.011 | -10.5325 | 1.94    | $5.81 \times 10^{-8}$  | <i>ATP8A2</i>            |
| Pre-FEV1/FVC  | 13  | 26268604      | A  | C  | 0.011 | -10.5325 | 1.94    | $5.81 \times 10^{-8}$  | <i>ATP8A2</i>            |
| Pre-FVC       | 20  | 22900228      | G  | A  | 0.010 | 18.0953  | 2.93    | $6.77 \times 10^{-10}$ | <i>THBD</i>              |
| Pre-FVC       | 16  | 54327903      | G  | A  | 0.023 | 9.8543   | 1.78    | $2.83 \times 10^{-8}$  | <i>IRX3, FTO</i>         |
| Pre-FVC       | 16  | 54327610      | A  | G  | 0.034 | 8.3689   | 1.53    | $4.85 \times 10^{-8}$  | <i>IRX3, FTO</i>         |

839 Table 2: Significant association results from GWAS. The p-values for all SNPs listed here met the significance threshold of  $9.95 \times 10^{-8}$ .  
840 SNPs were specified by chromosome (Chr) and physical position in base pairs (bp). A1 denotes the major allele, while A2 denotes  
841 the minor allele. MAF denotes the minor allele frequency (MAF).  $\beta$  denotes the effect size. "Std Err" is the standard error of the  
842 estimate of  $\beta$ . "Genes" denotes any genes within proximity of the associated variants.

| Locus | Phenotype    | Chr | Start (bp) | End (bp)   | Length (Kb) | Threshold             | SNP <sub>Admix</sub> (n) | SNP <sub>GWAS</sub> (n) | AFR (%) | Genes                                  |
|-------|--------------|-----|------------|------------|-------------|-----------------------|--------------------------|-------------------------|---------|----------------------------------------|
| 1     | Pre-FEV1     | 21  | 28,209,667 | 28,240,392 | 30.72       | $1.03 \times 10^{-4}$ | 4                        | 215                     | 78.7    | <i>ADAMTS1</i>                         |
| 2     | Pre-FVC      | 4   | 75,555,658 | 76,873,740 | 1318.08     | $9.64 \times 10^{-5}$ | 102                      | 7905                    | 79.8    | <i>RCHY1, THAP6</i>                    |
| 3     | Pre-FEV1/FVC | 19  | 7,068,207  | 7,127,294  | 59.09       | $1.04 \times 10^{-4}$ | 18                       | 376                     | 80.4    | <i>INSR, ZNF557</i>                    |
| 4     | Post-FVC     | 8   | 95,387,941 | 95,820,594 | 432.65      | $9.93 \times 10^{-5}$ | 45                       | 2822                    | 80.8    | <i>ESRP1, INTS8, TP53INP1, NDUFAF6</i> |
| 5     | Post-FVC     | 14  | 34,283,561 | 34,595,061 | 311.50      | $9.93 \times 10^{-5}$ | 95                       | 1982                    | 80.5    | <i>EGLN3, SNX6</i>                     |

844 Table 3: Admixture mapping in SAGE identified five regions with statistically significant association to at least one phenotype. The regions are arbitrarily numbered from 1 to 5  
845 and defined by phenotype, chromosome (Chr), physical starting point (in base pairs), and end point (in base pairs). Physical positions are given in hg19 coordinates. The total  
846 length of the region is given in kilobasepairs (Kb). The threshold for statistical significance is given for each region. SNP<sub>Admix</sub> counts the number (n) of genotyped SNPs from  
847 admixture mapping that met the significance threshold. SNP<sub>GWAS</sub> counts the total number of GWAS SNPs (genotyped and/or imputed) in the admixture mapping region. AFR  
848 denotes the percentage (%) of local genetic ancestry of African origin. The column "Genes" lists genes physically within and near the associated regions.

| Locus | Phenotype                 | Chr | Position (bp) | SNP        | Ref allele | Alt allele | MAF (%) | P-value               | Annotation                     | Pr(causal) |
|-------|---------------------------|-----|---------------|------------|------------|------------|---------|-----------------------|--------------------------------|------------|
| 1     | Pre-FEV <sub>1</sub>      | 21  | 28,209,667    | rs13615    | A          | G          | 2.55%   | $6.95 \times 10^{-3}$ | <i>ADAMTS1</i> , 3' UTR        | 0.630      |
| 2     | Pre-FVC                   | 4   | 76,464,584    | rs10857225 | A          | C          | 59.07%  | $3.11 \times 10^{-6}$ | <i>THAP6</i> , Intron Variant  | 0.361      |
| 3     | Pre-FEV <sub>1</sub> /FVC | 19  | 7,087,789     | rs72986681 | G          | A          | 1.54%   | $7.25 \times 10^{-4}$ | <i>ZNF557</i> , 3' UTR         | 0.168      |
| 4     | Post-FVC                  | 8   | 95,399,551    | rs2470740  | A          | T          | 23.82%  | $2.04 \times 10^{-3}$ | <i>RAD54B</i> , Intron Variant | 0.109      |
| 5     | Post-FVC                  | 14  | 34,531,633    | rs1351618  | C          | T          | 12.40%  | $1.99 \times 10^{-4}$ | <i>EGLN3</i> , Intron Variant  | 0.390      |

850 Table 4: Results from PAINTOR highlighting the most probably causal SNPs for each locus as defined by admixture mapping. Similar to Table 3, the loci are arbitrarily numbered  
851 from 1 to 5 and defined by phenotype and chromosome (Chr). The physical position (in basepairs) of the most likely causal SNP is given in hg19 coordinates. Minor allele  
852 frequencies (MAF) are taken from global populations from the gnomAD server v3. The displayed *p*-values are from our discovery GWAS. The probability of causality (Pr(causal))  
853 is computed from PAINTOR.

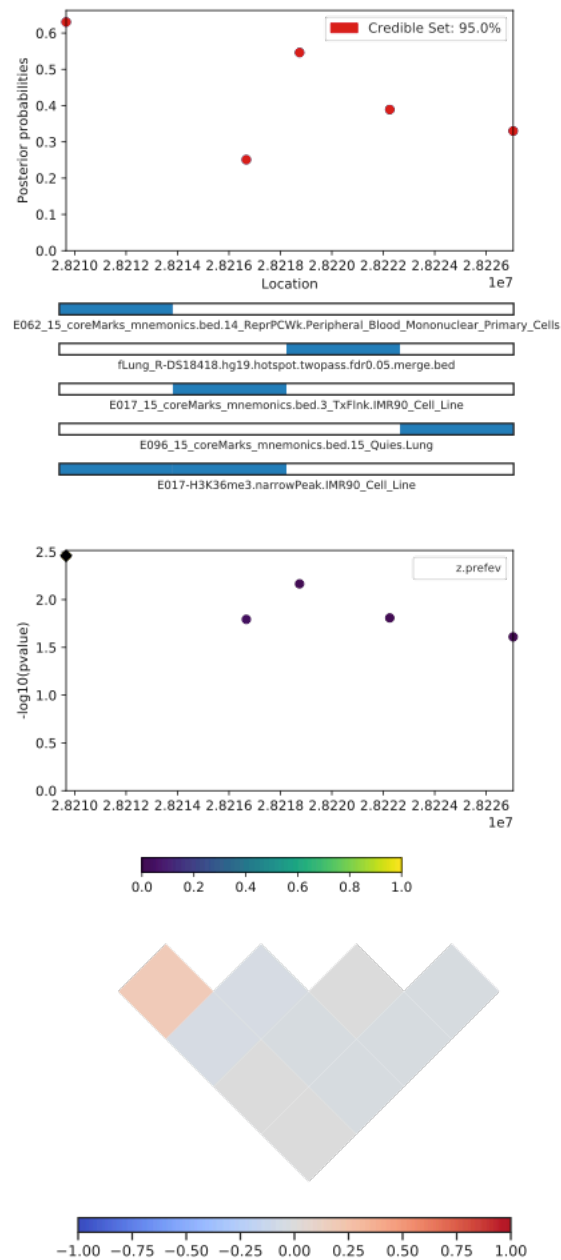

854

855 Figure 2: A CANVIS plot of results from PAINTOR functional fine-mapping for locus 1, an association with Pre-FEV<sub>1</sub> on chromosome  
856 21. The SNP rs13615, which sits in the 3' UTR of the gene *ADAMTS1*, attains a posterior probability of causality of 0.630. The panels  
857 show, from top to bottom, the posterior probability of causality; the 5 most informative functional annotations; GWAS p-values; and  
858 local linkage disequilibrium expressed as a signed Pearson correlation.

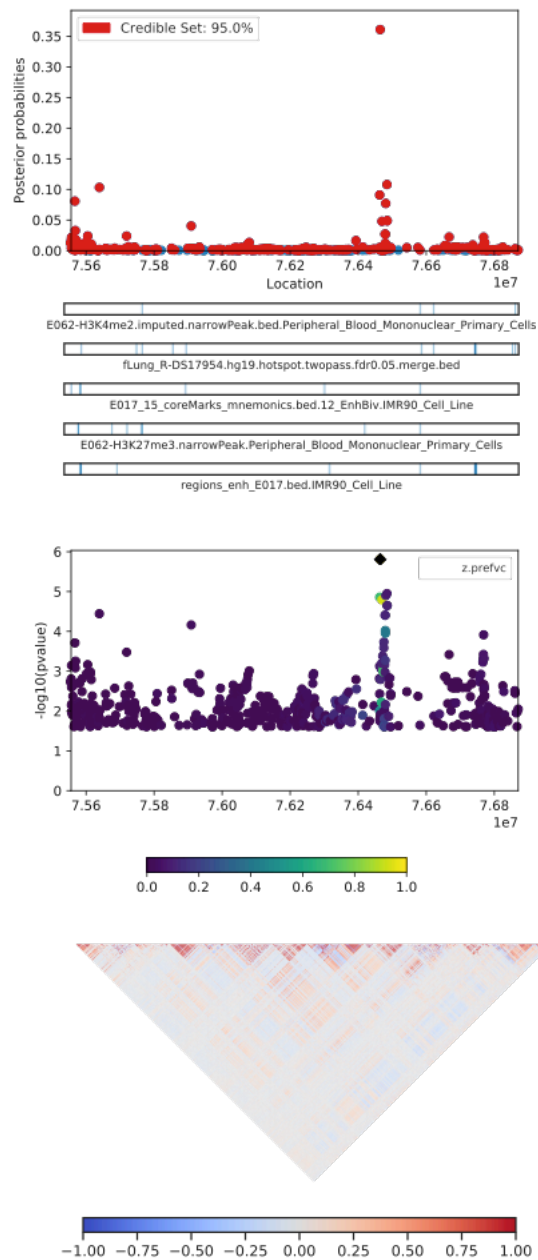

859

860 Figure 3: PAINTOR results for locus 2, an association on chromosome 4 with Pre-FVC. The sentinel SNP, rs10857225, corresponds  
861 with a GWAS peak that does not pass Bonferroni correction for statistical significance. The highlighted peak tags the intron of the  
862 gene *THAP6*.



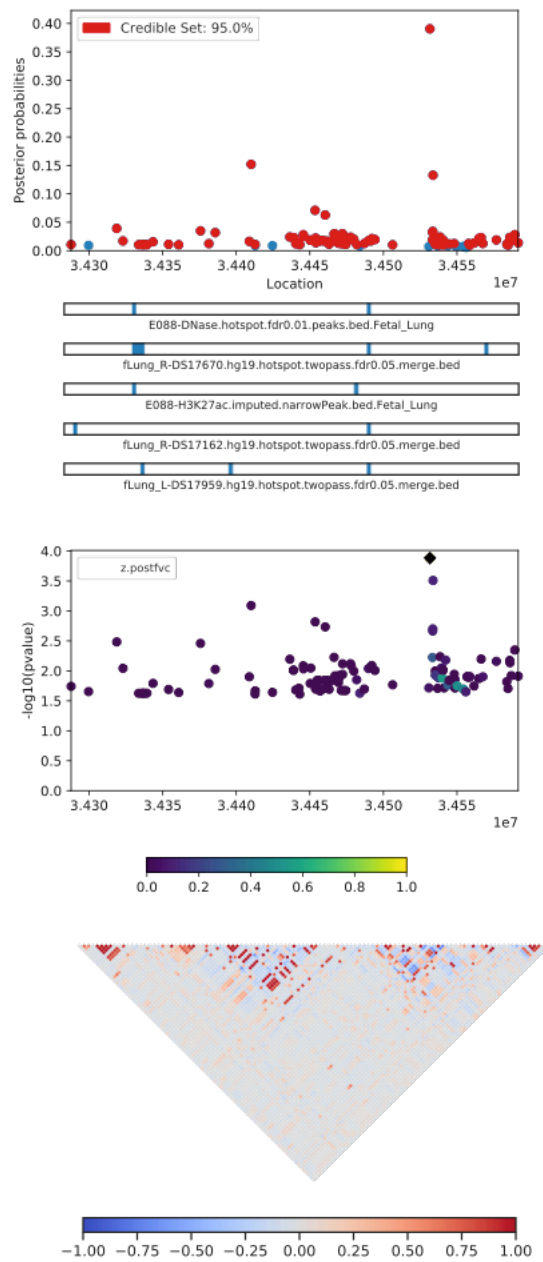

863

864 Figure 4: PAINTOR fine-mapping results for locus 5, corresponding to a region on chromosome 14 associated with Post-FVC. The most  
865 likely causal SNP, rs1351618, tags an intron of the gene *EGLN3*.

## 166 Supplementary Tables and Figures

167

|                   | Individuals ( <i>n</i> ) |                | Genotyped ( <i>n</i> ) |                | Imputed ( <i>n</i> ) |                   |
|-------------------|--------------------------|----------------|------------------------|----------------|----------------------|-------------------|
|                   | <i>retained</i>          | <i>removed</i> | <i>retained</i>        | <i>removed</i> | <i>retained</i>      | <i>removed</i>    |
| Initial           | 1985                     | -              | 772,703                | -              | 47,101,126           | -                 |
| (1) remove saliva | 1949                     | 36             | 772,703                | 0              | 47,101,126           | 0                 |
| (2) --geno 0.05   | 1949                     | 0              | 744,492                | 28,211         | 47,101,126           | 0                 |
| (3) --maf 0.01    | 1949                     | 0              | 664,072                | 80,420         | 16,005,708           | 31,095,418        |
| (4) --mind 0.05   | 1948                     | 1              | 664,072                | 0              | 16,005,708           | 0                 |
| (5) --hwe 0.0001  | 1948                     | 0              | 660,802                | 3,270          | 15,954,804           | 50,904            |
| <b>Final</b>      | <b>1948</b>              | <b>37</b>      | <b>660,802</b>         | <b>31,561</b>  | <b>15,954,804</b>    | <b>31,146,322</b> |

168 Supplementary Table 1: Counts of individuals and variants retained and removed during quality control, including filtering flags from  
169 PLINK 1.9. Initial indicates the starting number of individuals and variants in the unfiltered datasets. The subsequent row names  
170 refer to the plink command and threshold used for each step: (1) Individuals whose DNA was obtained from saliva rather than blood  
171 were removed; (2) Variants with genotyping efficiency below 95% were purged; (3) Variants with minor allele frequencies below 1%  
172 were excluded; (4) Individuals with genotyping efficiency below 95% were removed. (5) Variants that deviate from Hardy-Weinberg  
173 equilibrium with p-value < 0.0001 were purged.

174

| GWAS Trait                 | $\lambda$     | Effective Tests | Significance Threshold        | Suggestive Threshold          |
|----------------------------|---------------|-----------------|-------------------------------|-------------------------------|
| Post-FEV <sub>1</sub> /FVC | 0.9776        | 503667.1        | 9.93x 10 <sup>-8</sup>        | 1.99 x 10 <sup>-7</sup>       |
| Post-FEV <sub>1</sub>      | 0.9791        | 512041          | 9.76 x 10 <sup>-8</sup>       | 1.95 x 10 <sup>-7</sup>       |
| Post-FVC                   | 0.9732        | 488818.5        | 1.02 x 10 <sup>-7</sup>       | 2.05 x 10 <sup>-7</sup>       |
| Pre-FEV <sub>1</sub> /FVC  | 0.9885        | 499624.2        | 1.00 x 10 <sup>-7</sup>       | 2.00 x 10 <sup>-7</sup>       |
| Pre-FEV <sub>1</sub>       | 0.9870        | 507975.4        | 9.84 x 10 <sup>-8</sup>       | 1.97 x 10 <sup>-7</sup>       |
| Pre-FVC                    | 0.9893        | 502450.9        | 9.95 x 10 <sup>-8</sup>       | 1.99 x 10 <sup>-7</sup>       |
| <b>average</b>             | <b>0.9824</b> | <b>502429.5</b> | <b>9.95 x 10<sup>-8</sup></b> | <b>1.99 x 10<sup>-7</sup></b> |

175 Supplementary Table 2: Genomic inflation factors ( $\lambda$ ), effective numbers of tests ( $M_{\text{eff}}$ ), and both significance and suggestive thresholds  
176 are presented for the GWAS of each phenotype. The genomic inflation values were calculated in R. The number  $M_{\text{eff}}$  was estimated in  
177 R using the autocorrelation method from CODA. The significance threshold was calculated as  $1/M_{\text{eff}}$ , and the suggestive threshold was  
178 determined with  $0.5/M_{\text{eff}}$ .

179

80

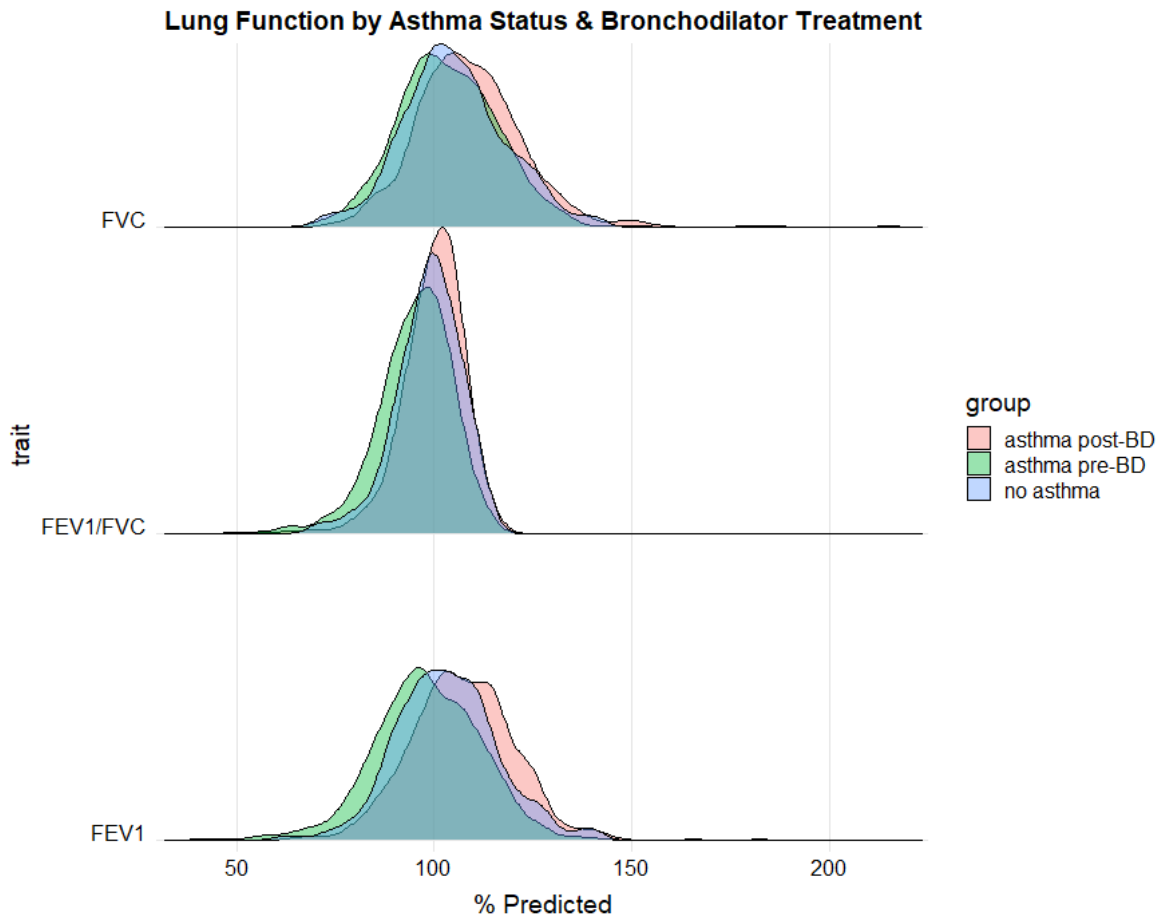

81

82 Supplementary Figure 1: Distributions of lung function measures stratified by asthma case status and bronchodilator treatment. Lung  
83 function values are normalized against predictions given by the Hankinson equations (% Predicted). Asthma controls (blue) received  
84 no bronchodilator medication. Asthma cases are separated by lung function values measured pre-bronchodilator (pre-BD, green) and  
85 post-bronchodilator (post-BD, red) administration.

86

## SAGE II Admixture Plot

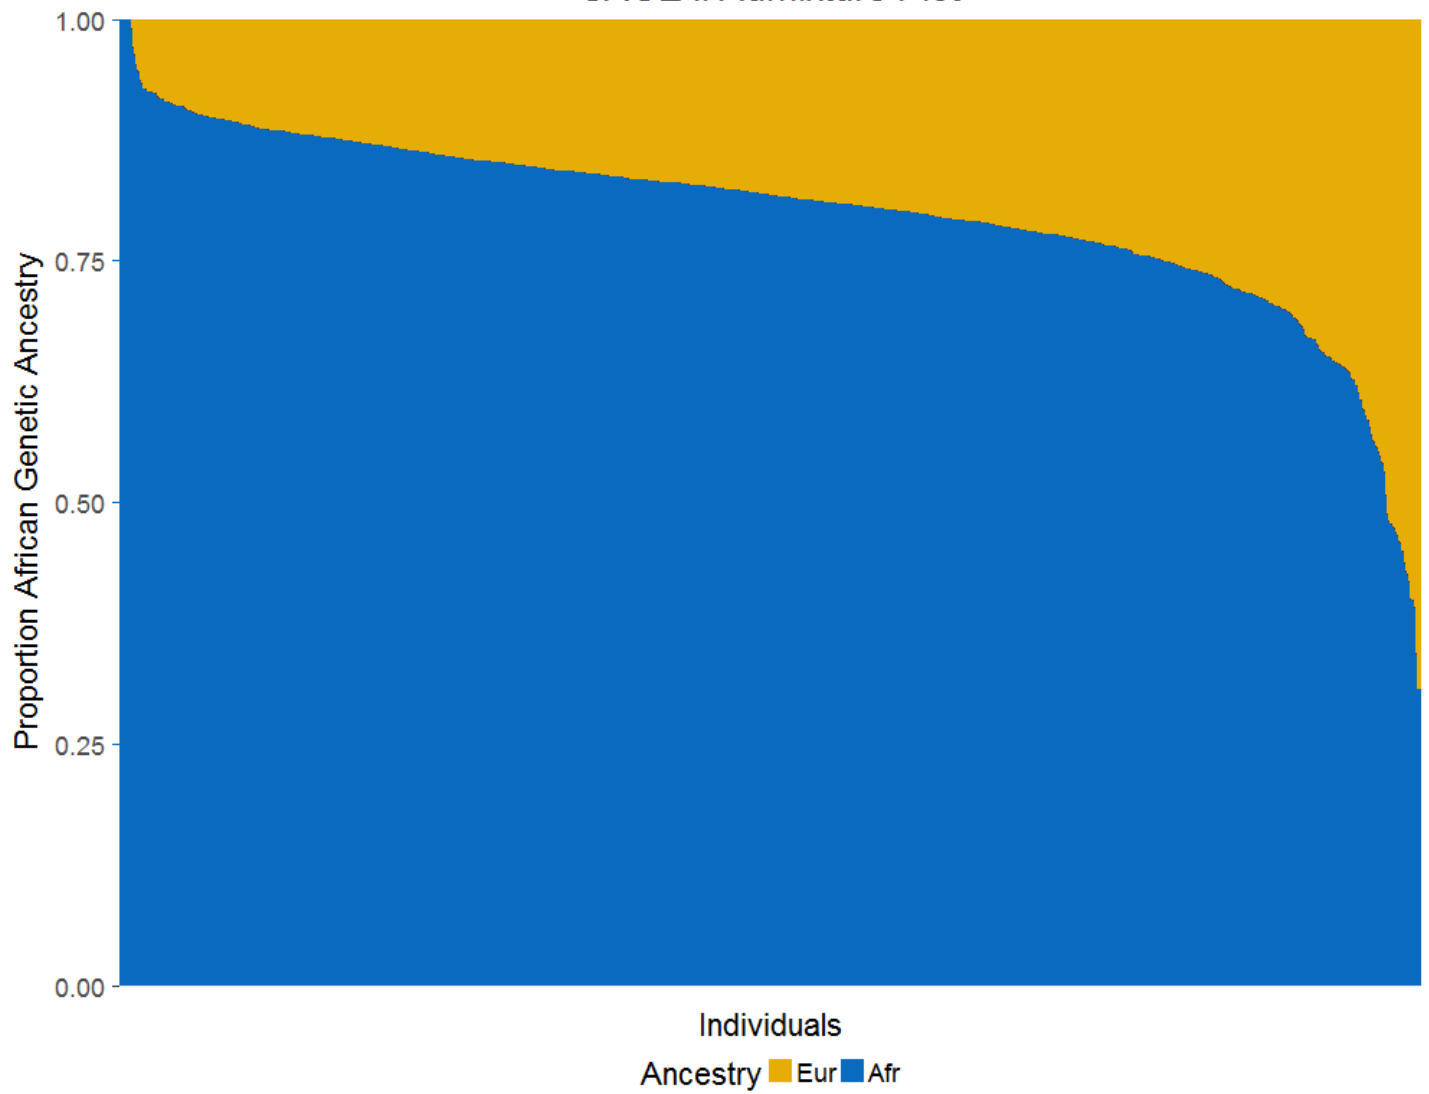

187

188 Supplementary Figure 2: A plot of global admixture proportions for SAGE subjects, ordered in descending proportion of African  
189 ancestry. In SAGE, the mean genetic ancestry proportion of African origin is 80.2%.

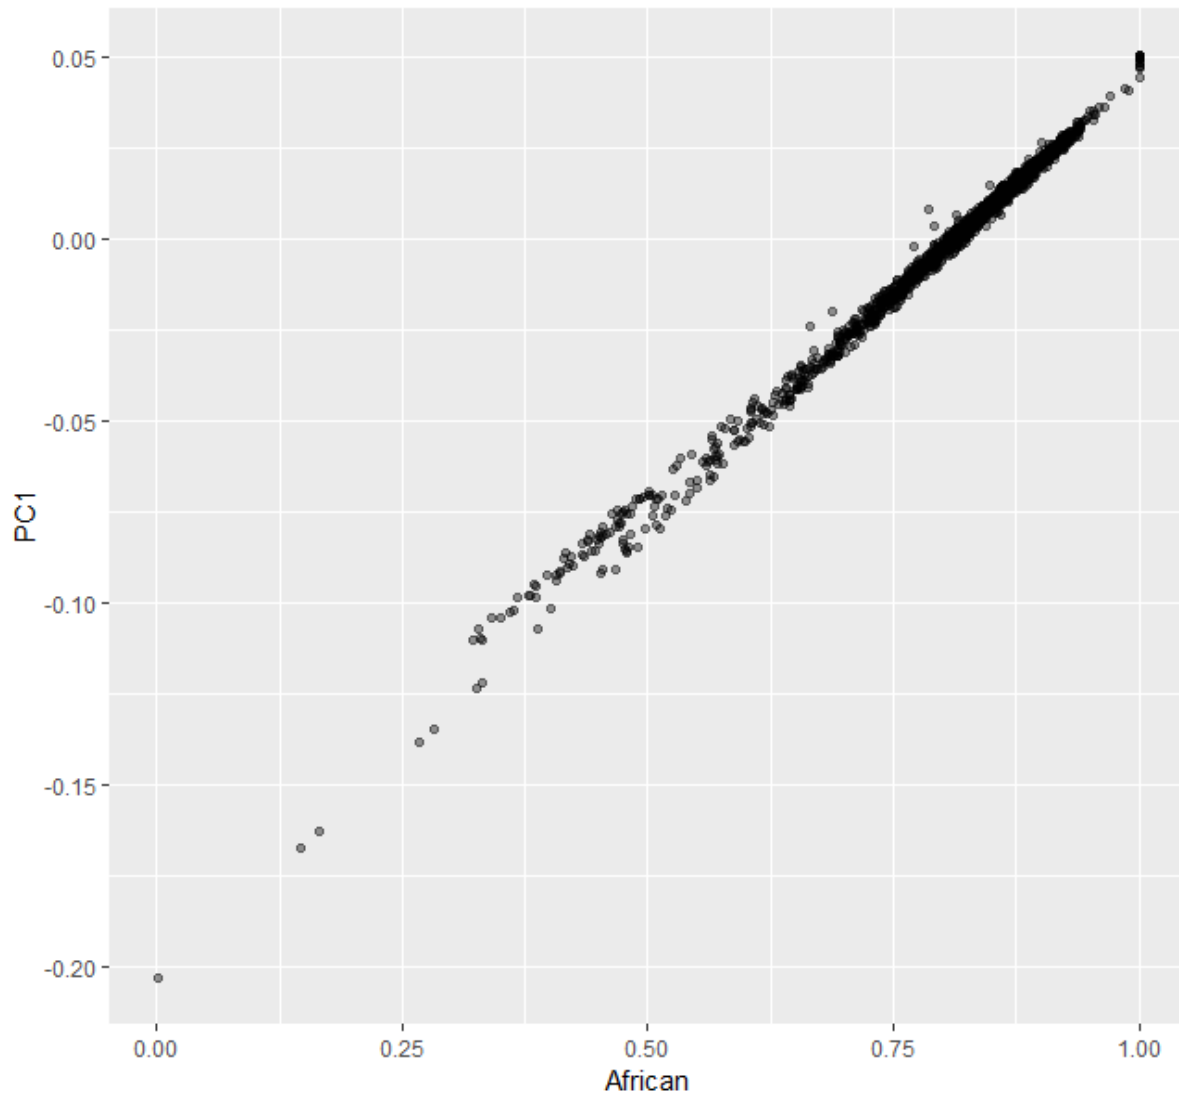

90

91 Supplementary Figure 3: A plot of the first genotype principal component (PC1) versus the proportion of global African genetic ancestry  
92 (African) shows that the two covariates are essentially exchangeable ( $R^2 = 0.984$ ).

93

## QQ Plots

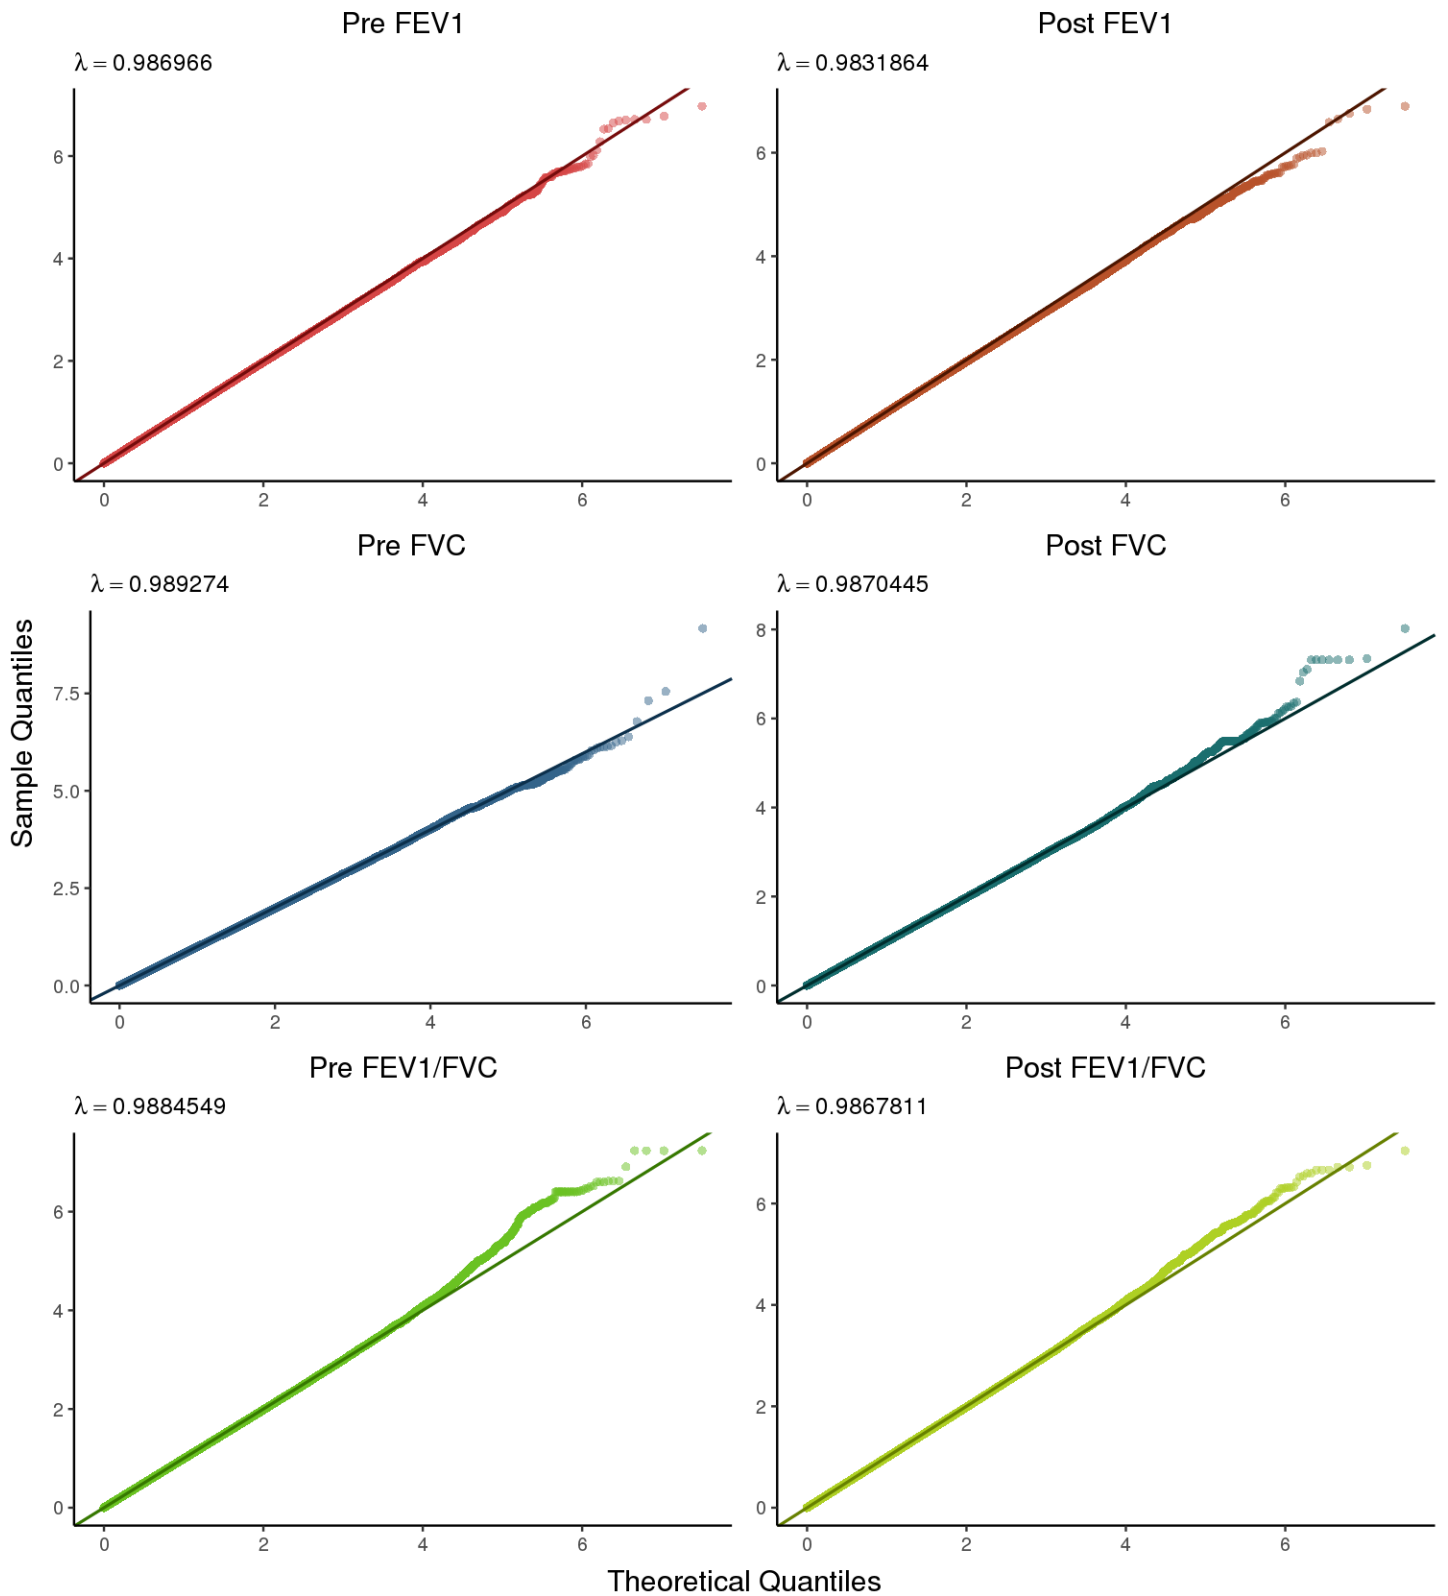

194

195 Supplementary Figure 4: Quantile-quantile plots for all six phenotypes subjected to GWAS. The left column contains Pre-BD  
196 phenotypes, while the right column contains the corresponding Post-BD phenotypes.

### Volcano Plots

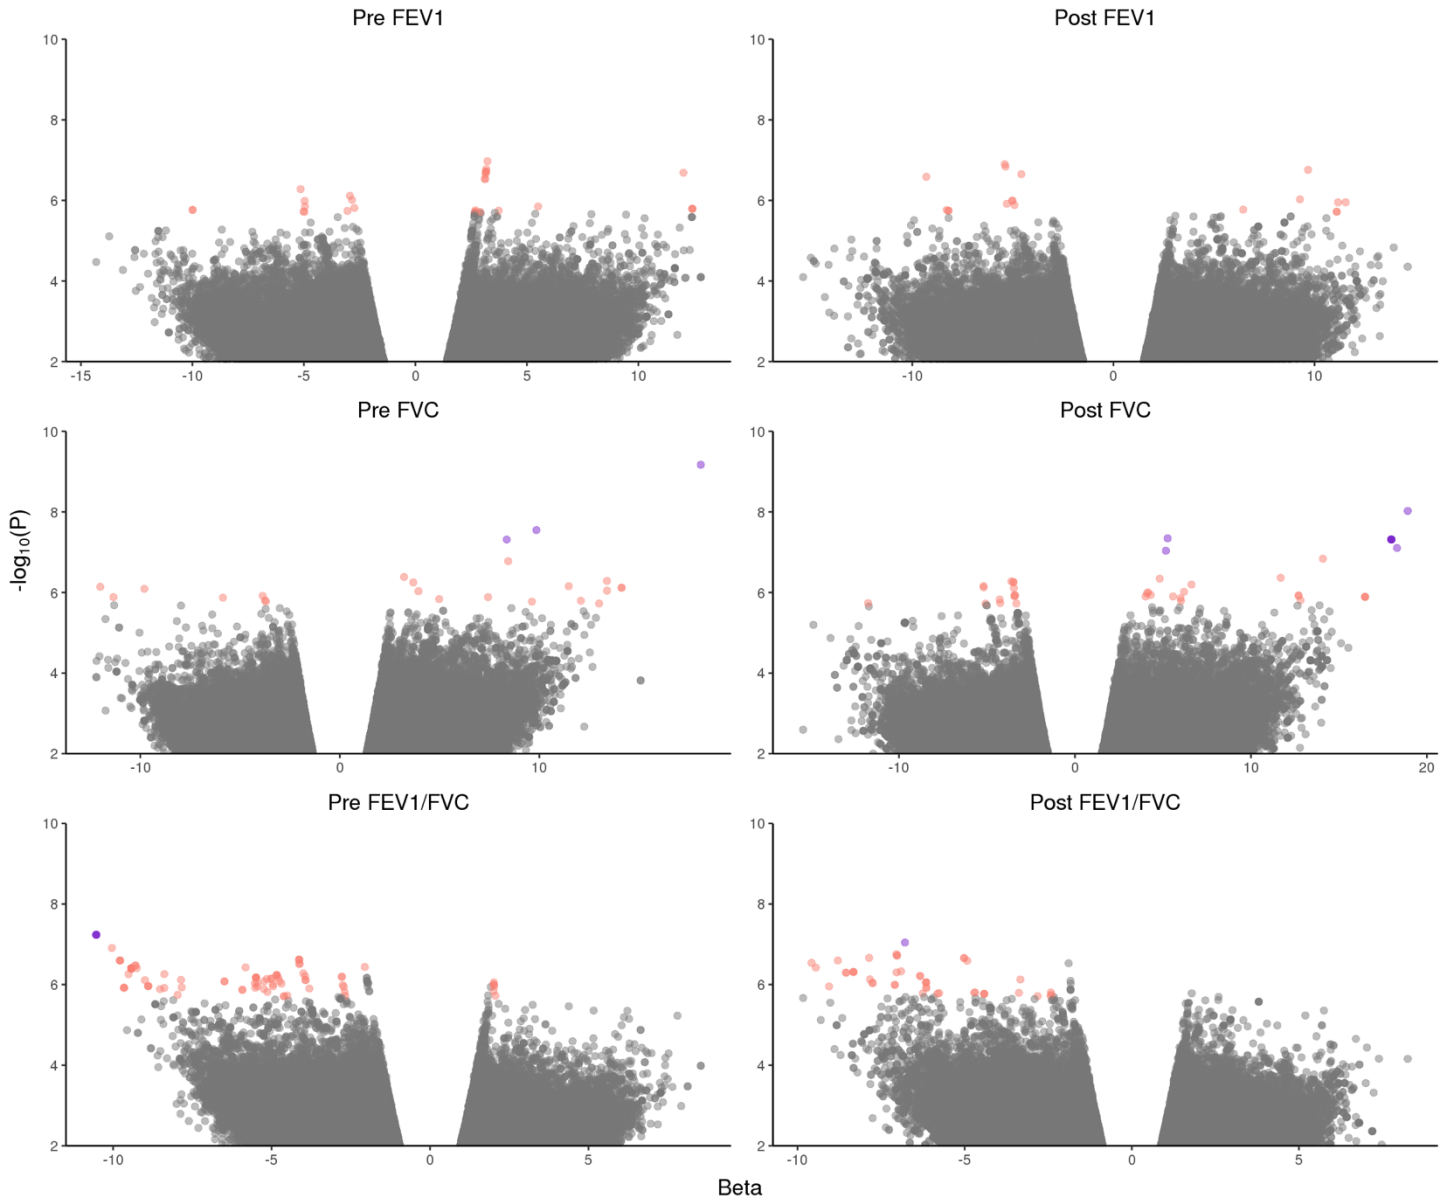

97

98 Supplementary Figure 5: Volcano plots showing the relationship between GWAS  $p$ -values and effect sizes  $\beta$ . As in Supplementary  
99 Figure 4, pre-BD traits are on the left, while post-BD traits are on the right. Variants meeting the CODA-adjusted suggestive threshold  
100 ( $1.99 \times 10^{-6}$ ) are highlighted in salmon pink; variants with a  $p$ -value  $\leq 1 \times 10^{-7}$  and  $|\beta| \geq 2$  are highlighted in purple. A positive value of  
101  $\beta$  indicates that the minor allele is associated with higher lung function, while  $\beta < 0$  indicates that the minor allele tracks with lower  
102 lung function compared to the major allele. Non-significant variants are shown in grey. Variants with a  $p$ -value  $< 0.05$  were deemed  
103 uninformative and therefore not plotted.

104

| Phenotype            | Chr | SNP          | Position (bp) | A1 | A2 | MAF   | $\beta$ | Std Err | P-value                 |
|----------------------|-----|--------------|---------------|----|----|-------|---------|---------|-------------------------|
| Pre-FEV <sub>1</sub> | 1   | 1:158003840  | 158003840     | C  | G  | 0.012 | 12.4180 | 2.59    | 1.61 x 10 <sup>-6</sup> |
| Pre-FEV <sub>1</sub> | 1   | 1:158004676  | 158004676     | C  | T  | 0.011 | 12.4151 | 2.59    | 1.62 x 10 <sup>-6</sup> |
| Pre-FEV <sub>1</sub> | 2   | 2:34321239   | 34321239      | C  | T  | 0.293 | -3.0486 | 0.639   | 1.82 x 10 <sup>-6</sup> |
| Pre-FEV <sub>1</sub> | 6   | 6:12318099   | 12318099      | A  | G  | 0.081 | -4.9768 | 1.05    | 1.92 x 10 <sup>-6</sup> |
| Pre-FEV <sub>1</sub> | 10  | 10:109510095 | 109510095     | T  | G  | 0.161 | 3.7327  | 0.782   | 1.79 x 10 <sup>-6</sup> |
| Pre-FEV <sub>1</sub> | 10  | 10:109519015 | 109519015     | A  | G  | 0.405 | -2.7360 | 0.569   | 1.54 x 10 <sup>-6</sup> |
| Pre-FEV <sub>1</sub> | 10  | 10:109531399 | 109531399     | C  | T  | 0.330 | 3.1622  | 0.607   | 1.93 x 10 <sup>-7</sup> |
| Pre-FEV <sub>1</sub> | 10  | 10:109531773 | 109531773     | A  | G  | 0.331 | 3.1622  | 0.607   | 1.93 x 10 <sup>-7</sup> |
| Pre-FEV <sub>1</sub> | 10  | 10:109532399 | 109532399     | G  | A  | 0.331 | 3.1409  | 0.607   | 2.24 x 10 <sup>-7</sup> |
| Pre-FEV <sub>1</sub> | 10  | 10:109532529 | 109532529     | G  | T  | 0.331 | 3.1755  | 0.607   | 1.66 x 10 <sup>-7</sup> |
| Pre-FEV <sub>1</sub> | 10  | 10:109533077 | 109533077     | C  | T  | 0.331 | 3.1174  | 0.608   | 2.89 x 10 <sup>-7</sup> |
| Pre-FEV <sub>1</sub> | 10  | 10:109538187 | 109538187     | A  | C  | 0.381 | -2.8430 | 0.580   | 9.71 x 10 <sup>-7</sup> |
| Pre-FEV <sub>1</sub> | 10  | 10:109538400 | 109538400     | T  | C  | 0.328 | 3.1254  | 0.610   | 2.98 x 10 <sup>-7</sup> |
| Pre-FEV <sub>1</sub> | 10  | 10:109542795 | 109542795     | C  | T  | 0.318 | 2.9032  | 0.610   | 1.94 x 10 <sup>-6</sup> |
| Pre-FEV <sub>1</sub> | 10  | 10:109543483 | 109543483     | G  | A  | 0.328 | 3.1689  | 0.609   | 1.98 x 10 <sup>-7</sup> |
| Pre-FEV <sub>1</sub> | 12  | 12:125410562 | 125410562     | T  | G  | 0.336 | -2.9360 | 0.594   | 7.68 x 10 <sup>-7</sup> |
| Pre-FEV <sub>1</sub> | 14  | 14:20641690  | 20641690      | C  | T  | 0.410 | 2.6744  | 0.563   | 1.99 x 10 <sup>-6</sup> |
| Pre-FEV <sub>1</sub> | 14  | 14:20641707  | 20641707      | T  | A  | 0.410 | 2.6744  | 0.563   | 1.99 x 10 <sup>-6</sup> |
| Pre-FEV <sub>1</sub> | 14  | 14:20641788  | 20641788      | A  | T  | 0.410 | 2.6795  | 0.563   | 1.93 x 10 <sup>-6</sup> |
| Pre-FEV <sub>1</sub> | 14  | 14:20642034  | 20642034      | A  | T  | 0.410 | 2.6878  | 0.562   | 1.76 x 10 <sup>-6</sup> |
| Pre-FEV <sub>1</sub> | 17  | 17:1307087   | 1307087       | A  | G  | 0.087 | -5.0185 | 1.05    | 1.90 x 10 <sup>-6</sup> |
| Pre-FEV <sub>1</sub> | 17  | 17:10856828  | 10856828      | G  | A  | 0.065 | 5.4992  | 1.14    | 1.42 x 10 <sup>-6</sup> |
| Pre-FEV <sub>1</sub> | 17  | 17:66947338  | 66947338      | G  | A  | 0.017 | -9.9925 | 2.09    | 1.72 x 10 <sup>-6</sup> |
| Pre-FEV <sub>1</sub> | 17  | 17:66947385  | 66947385      | G  | A  | 0.017 | -9.9925 | 2.09    | 1.72 x 10 <sup>-6</sup> |
| Pre-FEV <sub>1</sub> | 19  | 19:45780813  | 45780813      | G  | A  | 0.072 | -4.9503 | 1.03    | 1.42 x 10 <sup>-6</sup> |
| Pre-FEV <sub>1</sub> | 19  | 19:45782169  | 45782169      | T  | C  | 0.073 | -4.9651 | 1.02    | 1.03 x 10 <sup>-6</sup> |
| Pre-FEV <sub>1</sub> | 19  | 19:45782594  | 45782594      | G  | A  | 0.073 | -5.1489 | 1.03    | 5.24 x 10 <sup>-7</sup> |
| Pre-FEV <sub>1</sub> | 20  | 20:42117790  | 42117790      | T  | C  | 0.016 | 12.0182 | 2.31    | 2.05 x 10 <sup>-7</sup> |

105 Supplementary Table 3: Suggestive associations with Pre-FEV<sub>1</sub>.



| Phenotype | Chr | SNP         | Position (bp) | A1 | A2 | MAF   | $\beta$  | Std Err | P-value               |
|-----------|-----|-------------|---------------|----|----|-------|----------|---------|-----------------------|
| Pre-FVC   | 3   | 3:136065565 | 136065565     | G  | A  | 0.137 | 3.9445   | 0.804   | $9.28 \times 10^{-7}$ |
| Pre-FVC   | 3   | 3:136073920 | 136073920     | T  | C  | 0.165 | 3.6839   | 0.736   | $5.62 \times 10^{-7}$ |
| Pre-FVC   | 3   | 3:140836152 | 140836152     | A  | G  | 0.011 | 12.0836  | 2.52    | $1.60 \times 10^{-6}$ |
| Pre-FVC   | 3   | 3:172005706 | 172005706     | G  | T  | 0.026 | 8.4445   | 1.61    | $1.67 \times 10^{-7}$ |
| Pre-FVC   | 6   | 6:45961727  | 45961727      | T  | G  | 0.017 | 9.6273   | 2.01    | $1.68 \times 10^{-6}$ |
| Pre-FVC   | 6   | 6:162713288 | 162713288     | A  | G  | 0.014 | 11.4754  | 2.31    | $6.98 \times 10^{-7}$ |
| Pre-FVC   | 11  | 11:86410675 | 86410675      | A  | G  | 0.010 | 13.3956  | 2.73    | $8.98 \times 10^{-7}$ |
| Pre-FVC   | 14  | 14:51754057 | 51754057      | T  | C  | 0.216 | 3.2204   | 0.636   | $4.11 \times 10^{-7}$ |
| Pre-FVC   | 15  | 15:68708723 | 68708723      | T  | C  | 0.142 | -3.7504  | 0.781   | $1.57 \times 10^{-6}$ |
| Pre-FVC   | 16  | 16:54327610 | 54327610      | A  | G  | 0.034 | 8.3689   | 1.53    | $4.85 \times 10^{-8}$ |
| Pre-FVC   | 16  | 16:54327903 | 54327903      | G  | A  | 0.023 | 9.8543   | 1.78    | $2.83 \times 10^{-8}$ |
| Pre-FVC   | 19  | 19:7732700  | 7732700       | C  | T  | 0.030 | 7.4308   | 1.54    | $1.30 \times 10^{-6}$ |
| Pre-FVC   | 19  | 19:36353880 | 36353880      | A  | G  | 0.121 | -3.8618  | 0.796   | $1.21 \times 10^{-6}$ |
| Pre-FVC   | 19  | 19:36372775 | 36372775      | T  | C  | 0.129 | -3.7039  | 0.773   | $1.67 \times 10^{-6}$ |
| Pre-FVC   | 20  | 20:22900228 | 22900228      | G  | A  | 0.010 | 18.0953  | 2.93    | $6.77 \times 10^{-7}$ |
| Pre-FVC   | 20  | 20:22960678 | 22960678      | A  | G  | 0.012 | 13.3932  | 2.67    | $5.17 \times 10^{-7}$ |
| Pre-FVC   | 20  | 20:49240699 | 49240699      | G  | A  | 0.070 | 4.9814   | 1.03    | $1.46 \times 10^{-6}$ |
| Pre-FVC   | 20  | 20:58734941 | 58734941      | A  | T  | 0.010 | 14.1234  | 2.86    | $7.61 \times 10^{-7}$ |
| Pre-FVC   | 20  | 20:58735391 | 58735391      | C  | G  | 0.010 | 14.1234  | 2.86    | $7.61 \times 10^{-7}$ |
| Pre-FVC   | 21  | 21:25030141 | 25030141      | G  | T  | 0.015 | -12.0039 | 2.42    | $7.24 \times 10^{-7}$ |
| Pre-FVC   | 21  | 21:25045811 | 25045811      | A  | G  | 0.016 | -11.3463 | 2.34    | $1.30 \times 10^{-6}$ |
| Pre-FVC   | 21  | 21:26032912 | 26032912      | C  | G  | 0.011 | 12.9973  | 2.73    | $1.87 \times 10^{-6}$ |
| Pre-FVC   | 22  | 22:35972126 | 35972126      | G  | A  | 0.052 | -5.8582  | 1.21    | $1.34 \times 10^{-6}$ |

107 Supplementary Table 4: Suggestive associations with Pre-FVC.

| Phenotype                 | Chr | SNP         | Position (bp) | A1 | A2 | MAF   | $\beta$ | Std Err | P-value                 |
|---------------------------|-----|-------------|---------------|----|----|-------|---------|---------|-------------------------|
| Pre-FEV <sub>1</sub> /FVC | 2   | 2:37977506  | 37977506      | C  | T  | 0.035 | -4.9670 | 1.01    | 9.81 x 10 <sup>-7</sup> |
| Pre-FEV <sub>1</sub> /FVC | 2   | 2:236936348 | 236936348     | C  | G  | 0.469 | 1.8358  | 0.385   | 1.85 x 10 <sup>-6</sup> |
| Pre-FEV <sub>1</sub> /FVC | 3   | 3:31401513  | 31401513      | A  | T  | 0.020 | -6.4871 | 1.32    | 8.34 x 10 <sup>-7</sup> |
| Pre-FEV <sub>1</sub> /FVC | 3   | 3:31401514  | 31401514      | C  | T  | 0.020 | -6.4871 | 1.32    | 8.34 x 10 <sup>-7</sup> |
| Pre-FEV <sub>1</sub> /FVC | 4   | 4:96879482  | 96879482      | C  | T  | 0.019 | -7.8595 | 1.59    | 7.62 x 10 <sup>-7</sup> |
| Pre-FEV <sub>1</sub> /FVC | 4   | 4:96913583  | 96913583      | C  | T  | 0.011 | -9.2573 | 1.82    | 3.89 x 10 <sup>-7</sup> |
| Pre-FEV <sub>1</sub> /FVC | 5   | 5:49943626  | 49943626      | A  | G  | 0.465 | -1.9196 | 0.398   | 1.44 x 10 <sup>-6</sup> |
| Pre-FEV <sub>1</sub> /FVC | 5   | 5:49943944  | 49943944      | G  | A  | 0.465 | -1.9191 | 0.399   | 1.48 x 10 <sup>-6</sup> |
| Pre-FEV <sub>1</sub> /FVC | 5   | 5:49980285  | 49980285      | G  | C  | 0.476 | -1.9524 | 0.398   | 9.30 x 10 <sup>-7</sup> |
| Pre-FEV <sub>1</sub> /FVC | 5   | 5:50028474  | 50028474      | A  | G  | 0.481 | -1.9960 | 0.402   | 6.79 x 10 <sup>-7</sup> |
| Pre-FEV <sub>1</sub> /FVC | 5   | 5:50033254  | 50033254      | A  | C  | 0.481 | -1.9960 | 0.402   | 6.79 x 10 <sup>-7</sup> |
| Pre-FEV <sub>1</sub> /FVC | 5   | 5:50068245  | 50068245      | T  | A  | 0.481 | -1.9881 | 0.403   | 8.07 x 10 <sup>-7</sup> |
| Pre-FEV <sub>1</sub> /FVC | 5   | 5:50089919  | 50089919      | A  | G  | 0.482 | -1.9828 | 0.402   | 8.18 x 10 <sup>-7</sup> |
| Pre-FEV <sub>1</sub> /FVC | 5   | 5:50140456  | 50140456      | A  | G  | 0.471 | -1.9802 | 0.403   | 9.11 x 10 <sup>-7</sup> |
| Pre-FEV <sub>1</sub> /FVC | 5   | 5:50140616  | 50140616      | C  | T  | 0.477 | -2.0583 | 0.405   | 3.66 x 10 <sup>-7</sup> |
| Pre-FEV <sub>1</sub> /FVC | 7   | 7:23773818  | 23773818      | C  | T  | 0.408 | 1.9154  | 0.394   | 1.14 x 10 <sup>-6</sup> |
| Pre-FEV <sub>1</sub> /FVC | 7   | 7:23819271  | 23819271      | G  | T  | 0.288 | 2.0651  | 0.433   | 1.90 x 10 <sup>-6</sup> |
| Pre-FEV <sub>1</sub> /FVC | 7   | 7:23819738  | 23819738      | C  | G  | 0.343 | 2.0170  | 0.410   | 8.82 x 10 <sup>-7</sup> |
| Pre-FEV <sub>1</sub> /FVC | 7   | 7:23820068  | 23820068      | A  | T  | 0.343 | 2.0105  | 0.411   | 9.95 x 10 <sup>-7</sup> |
| Pre-FEV <sub>1</sub> /FVC | 7   | 7:23821784  | 23821784      | C  | A  | 0.343 | 2.0105  | 0.411   | 9.95 x 10 <sup>-7</sup> |
| Pre-FEV <sub>1</sub> /FVC | 7   | 7:23823355  | 23823355      | G  | A  | 0.329 | 2.0050  | 0.416   | 1.44 x 10 <sup>-6</sup> |
| Pre-FEV <sub>1</sub> /FVC | 7   | 7:23824013  | 23824013      | G  | C  | 0.330 | 2.0254  | 0.416   | 1.10 x 10 <sup>-6</sup> |
| Pre-FEV <sub>1</sub> /FVC | 7   | 7:52038019  | 52038019      | G  | A  | 0.011 | -9.6564 | 1.99    | 1.20 x 10 <sup>-6</sup> |
| Pre-FEV <sub>1</sub> /FVC | 7   | 7:52041108  | 52041108      | C  | G  | 0.011 | -9.6564 | 1.99    | 1.20 x 10 <sup>-6</sup> |
| Pre-FEV <sub>1</sub> /FVC | 7   | 7:52042215  | 52042215      | A  | C  | 0.011 | -9.6564 | 1.99    | 1.20 x 10 <sup>-6</sup> |
| Pre-FEV <sub>1</sub> /FVC | 10  | 10:4647237  | 4647237       | C  | T  | 0.015 | -7.8359 | 1.61    | 1.17 x 10 <sup>-6</sup> |
| Pre-FEV <sub>1</sub> /FVC | 10  | 10:4706126  | 4706126       | A  | G  | 0.040 | -4.6870 | 0.956   | 9.48 x 10 <sup>-7</sup> |
| Pre-FEV <sub>1</sub> /FVC | 10  | 10:24126147 | 24126147      | T  | A  | 0.010 | -8.3860 | 1.73    | 1.22 x 10 <sup>-6</sup> |
| Pre-FEV <sub>1</sub> /FVC | 10  | 10:69368950 | 69368950      | C  | T  | 0.037 | -4.6094 | 0.969   | 1.95 x 10 <sup>-6</sup> |
| Pre-FEV <sub>1</sub> /FVC | 10  | 10:69373810 | 69373810      | A  | G  | 0.037 | -4.6094 | 0.969   | 1.95 x 10 <sup>-6</sup> |
| Pre-FEV <sub>1</sub> /FVC | 10  | 10:69434683 | 69434683      | G  | A  | 0.038 | -4.7908 | 0.964   | 6.73 x 10 <sup>-7</sup> |
| Pre-FEV <sub>1</sub> /FVC | 10  | 10:69471854 | 69471854      | A  | G  | 0.038 | -4.8378 | 0.968   | 5.81 x 10 <sup>-7</sup> |
| Pre-FEV <sub>1</sub> /FVC | 10  | 10:69493149 | 69493149      | C  | T  | 0.038 | -4.8378 | 0.968   | 5.81 x 10 <sup>-7</sup> |
| Pre-FEV <sub>1</sub> /FVC | 10  | 10:69512750 | 69512750      | G  | A  | 0.039 | -4.7482 | 0.963   | 8.23 x 10 <sup>-7</sup> |
| Pre-FEV <sub>1</sub> /FVC | 10  | 10:69543254 | 69543254      | A  | G  | 0.033 | -5.1457 | 1.04    | 7.20 x 10 <sup>-7</sup> |
| Pre-FEV <sub>1</sub> /FVC | 10  | 10:69583770 | 69583770      | T  | C  | 0.030 | -5.2467 | 1.08    | 1.28 x 10 <sup>-6</sup> |
| Pre-FEV <sub>1</sub> /FVC | 10  | 10:69600576 | 69600576      | T  | C  | 0.051 | -4.1251 | 0.806   | 3.10 x 10 <sup>-7</sup> |
| Pre-FEV <sub>1</sub> /FVC | 10  | 10:69607048 | 69607048      | C  | T  | 0.052 | -4.1152 | 0.803   | 3.02 x 10 <sup>-7</sup> |
| Pre-FEV <sub>1</sub> /FVC | 10  | 10:69622074 | 69622074      | A  | T  | 0.052 | -3.9272 | 0.795   | 7.74 x 10 <sup>-7</sup> |
| Pre-FEV <sub>1</sub> /FVC | 10  | 10:69622076 | 69622076      | G  | A  | 0.052 | -3.9272 | 0.795   | 7.74 x 10 <sup>-7</sup> |
| Pre-FEV <sub>1</sub> /FVC | 10  | 10:69629302 | 69629302      | A  | G  | 0.028 | -5.4903 | 1.10    | 6.68 x 10 <sup>-7</sup> |
| Pre-FEV <sub>1</sub> /FVC | 10  | 10:69629812 | 69629812      | T  | G  | 0.028 | -5.4903 | 1.10    | 6.68 x 10 <sup>-7</sup> |
| Pre-FEV <sub>1</sub> /FVC | 10  | 10:69631004 | 69631004      | A  | G  | 0.028 | -5.4903 | 1.10    | 6.68 x 10 <sup>-7</sup> |

|                           |    |              |           |   |   |       |          |       |                         |
|---------------------------|----|--------------|-----------|---|---|-------|----------|-------|-------------------------|
| Pre-FEV <sub>1</sub> /FVC | 10 | 10:69655216  | 69655216  | T | C | 0.052 | -3.9421  | 0.791 | 6.20 x 10 <sup>-7</sup> |
| Pre-FEV <sub>1</sub> /FVC | 10 | 10:69655466  | 69655466  | A | G | 0.028 | -5.4903  | 1.10  | 6.68 x 10 <sup>-7</sup> |
| Pre-FEV <sub>1</sub> /FVC | 10 | 10:69668476  | 69668476  | A | T | 0.029 | -5.1320  | 1.07  | 1.52 x 10 <sup>-6</sup> |
| Pre-FEV <sub>1</sub> /FVC | 10 | 10:69668477  | 69668477  | T | G | 0.028 | -5.4554  | 1.11  | 9.05 x 10 <sup>-7</sup> |
| Pre-FEV <sub>1</sub> /FVC | 10 | 10:69673174  | 69673174  | T | C | 0.028 | -5.5138  | 1.14  | 1.21 x 10 <sup>-6</sup> |
| Pre-FEV <sub>1</sub> /FVC | 10 | 10:69693013  | 69693013  | C | A | 0.051 | -3.9993  | 0.797 | 5.25 x 10 <sup>-7</sup> |
| Pre-FEV <sub>1</sub> /FVC | 10 | 10:69699710  | 69699710  | A | G | 0.051 | -4.1297  | 0.800 | 2.41 x 10 <sup>-7</sup> |
| Pre-FEV <sub>1</sub> /FVC | 10 | 10:69701403  | 69701403  | T | C | 0.051 | -4.1297  | 0.800 | 2.41 x 10 <sup>-7</sup> |
| Pre-FEV <sub>1</sub> /FVC | 10 | 10:69702559  | 69702559  | T | C | 0.051 | -4.1303  | 0.800 | 2.40 x 10 <sup>-7</sup> |
| Pre-FEV <sub>1</sub> /FVC | 11 | 11:23684142  | 23684142  | G | C | 0.011 | -8.5207  | 1.76  | 1.30 x 10 <sup>-6</sup> |
| Pre-FEV <sub>1</sub> /FVC | 11 | 11:116627541 | 116627541 | T | C | 0.013 | -8.3846  | 1.67  | 5.49 x 10 <sup>-7</sup> |
| Pre-FEV <sub>1</sub> /FVC | 13 | 13:26171336  | 26171336  | C | T | 0.012 | -8.8936  | 1.82  | 1.09 x 10 <sup>-6</sup> |
| Pre-FEV <sub>1</sub> /FVC | 13 | 13:26172491  | 26172491  | G | A | 0.012 | -8.8941  | 1.82  | 1.09 x 10 <sup>-6</sup> |
| Pre-FEV <sub>1</sub> /FVC | 13 | 13:26173637  | 26173637  | C | G | 0.012 | -8.8936  | 1.82  | 1.09 x 10 <sup>-6</sup> |
| Pre-FEV <sub>1</sub> /FVC | 13 | 13:26178584  | 26178584  | G | T | 0.012 | -9.2967  | 1.82  | 3.35 x 10 <sup>-7</sup> |
| Pre-FEV <sub>1</sub> /FVC | 13 | 13:26179307  | 26179307  | A | G | 0.012 | -9.4254  | 1.86  | 3.97 x 10 <sup>-7</sup> |
| Pre-FEV <sub>1</sub> /FVC | 13 | 13:26179851  | 26179851  | G | A | 0.012 | -9.4264  | 1.86  | 3.97 x 10 <sup>-7</sup> |
| Pre-FEV <sub>1</sub> /FVC | 13 | 13:26180215  | 26180215  | C | G | 0.012 | -9.4264  | 1.86  | 3.97 x 10 <sup>-7</sup> |
| Pre-FEV <sub>1</sub> /FVC | 13 | 13:26180560  | 26180560  | T | C | 0.012 | -9.4272  | 1.86  | 3.96 x 10 <sup>-7</sup> |
| Pre-FEV <sub>1</sub> /FVC | 13 | 13:26180708  | 26180708  | C | A | 0.012 | -9.4264  | 1.86  | 3.97 x 10 <sup>-7</sup> |
| Pre-FEV <sub>1</sub> /FVC | 13 | 13:26180788  | 26180788  | C | T | 0.012 | -9.4264  | 1.86  | 3.97 x 10 <sup>-7</sup> |
| Pre-FEV <sub>1</sub> /FVC | 13 | 13:26181052  | 26181052  | A | T | 0.012 | -9.4264  | 1.86  | 3.97 x 10 <sup>-7</sup> |
| Pre-FEV <sub>1</sub> /FVC | 13 | 13:26181377  | 26181377  | T | A | 0.012 | -9.4264  | 1.86  | 3.97 x 10 <sup>-7</sup> |
| Pre-FEV <sub>1</sub> /FVC | 13 | 13:26181548  | 26181548  | T | C | 0.012 | -9.4264  | 1.86  | 3.97 x 10 <sup>-7</sup> |
| Pre-FEV <sub>1</sub> /FVC | 13 | 13:26181808  | 26181808  | T | C | 0.012 | -9.4264  | 1.86  | 3.97 x 10 <sup>-7</sup> |
| Pre-FEV <sub>1</sub> /FVC | 13 | 13:26182111  | 26182111  | G | A | 0.012 | -9.4264  | 1.86  | 3.97 x 10 <sup>-7</sup> |
| Pre-FEV <sub>1</sub> /FVC | 13 | 13:26186904  | 26186904  | C | T | 0.012 | -9.4272  | 1.86  | 3.96 x 10 <sup>-7</sup> |
| Pre-FEV <sub>1</sub> /FVC | 13 | 13:26187050  | 26187050  | T | C | 0.012 | -9.4264  | 1.86  | 3.97 x 10 <sup>-7</sup> |
| Pre-FEV <sub>1</sub> /FVC | 13 | 13:26187226  | 26187226  | G | A | 0.012 | -9.4272  | 1.86  | 3.96 x 10 <sup>-7</sup> |
| Pre-FEV <sub>1</sub> /FVC | 13 | 13:26187654  | 26187654  | G | A | 0.012 | -9.4264  | 1.86  | 3.97 x 10 <sup>-7</sup> |
| Pre-FEV <sub>1</sub> /FVC | 13 | 13:26190577  | 26190577  | T | C | 0.011 | -10.0394 | 1.90  | 1.23 x 10 <sup>-7</sup> |
| Pre-FEV <sub>1</sub> /FVC | 13 | 13:26191329  | 26191329  | T | C | 0.012 | -9.4272  | 1.86  | 3.96 x 10 <sup>-7</sup> |
| Pre-FEV <sub>1</sub> /FVC | 13 | 13:26191597  | 26191597  | G | T | 0.012 | -9.4272  | 1.86  | 3.96 x 10 <sup>-7</sup> |
| Pre-FEV <sub>1</sub> /FVC | 13 | 13:26198053  | 26198053  | T | G | 0.011 | -9.7840  | 1.90  | 2.52 x 10 <sup>-7</sup> |
| Pre-FEV <sub>1</sub> /FVC | 13 | 13:26201829  | 26201829  | G | C | 0.011 | -9.7840  | 1.90  | 2.52 x 10 <sup>-7</sup> |
| Pre-FEV <sub>1</sub> /FVC | 13 | 13:26235394  | 26235394  | G | A | 0.010 | -10.5334 | 1.94  | 5.80 x 10 <sup>-8</sup> |
| Pre-FEV <sub>1</sub> /FVC | 13 | 13:26247080  | 26247080  | G | A | 0.010 | -10.5334 | 1.94  | 5.80 x 10 <sup>-8</sup> |
| Pre-FEV <sub>1</sub> /FVC | 13 | 13:26262378  | 26262378  | T | G | 0.011 | -10.5325 | 1.94  | 5.81 x 10 <sup>-8</sup> |
| Pre-FEV <sub>1</sub> /FVC | 13 | 13:26268604  | 26268604  | A | C | 0.011 | -10.5325 | 1.94  | 5.81 x 10 <sup>-8</sup> |
| Pre-FEV <sub>1</sub> /FVC | 13 | 13:26280122  | 26280122  | A | G | 0.011 | -9.5140  | 1.90  | 5.52 x 10 <sup>-7</sup> |
| Pre-FEV <sub>1</sub> /FVC | 14 | 14:94463882  | 94463882  | C | T | 0.028 | -5.9224  | 1.23  | 1.35 x 10 <sup>-6</sup> |
| Pre-FEV <sub>1</sub> /FVC | 14 | 14:94467860  | 94467860  | T | C | 0.028 | -5.9224  | 1.23  | 1.35 x 10 <sup>-6</sup> |
| Pre-FEV <sub>1</sub> /FVC | 14 | 14:94472407  | 94472407  | G | A | 0.036 | -5.5247  | 1.13  | 9.25 x 10 <sup>-7</sup> |
| Pre-FEV <sub>1</sub> /FVC | 14 | 14:94472871  | 94472871  | G | T | 0.036 | -5.4523  | 1.12  | 1.10 x 10 <sup>-6</sup> |
| Pre-FEV <sub>1</sub> /FVC | 14 | 14:94479922  | 94479922  | A | G | 0.033 | -5.8213  | 1.15  | 3.74 x 10 <sup>-7</sup> |

|                           |    |             |          |   |   |       |         |       |                         |
|---------------------------|----|-------------|----------|---|---|-------|---------|-------|-------------------------|
| Pre-FEV <sub>1</sub> /FVC | 15 | 15:78801396 | 78801396 | C | A | 0.139 | -2.6943 | 0.560 | 1.53 x 10 <sup>-6</sup> |
| Pre-FEV <sub>1</sub> /FVC | 15 | 15:78805789 | 78805789 | C | G | 0.140 | -2.7840 | 0.559 | 6.37 x 10 <sup>-7</sup> |
| Pre-FEV <sub>1</sub> /FVC | 15 | 15:78807732 | 78807732 | A | C | 0.140 | -2.7840 | 0.559 | 6.37 x 10 <sup>-7</sup> |
| Pre-FEV <sub>1</sub> /FVC | 15 | 15:78811677 | 78811677 | C | T | 0.140 | -2.7233 | 0.560 | 1.14 x 10 <sup>-6</sup> |
| Pre-FEV <sub>1</sub> /FVC | 15 | 15:78821368 | 78821368 | A | C | 0.139 | -2.6730 | 0.561 | 1.90 x 10 <sup>-6</sup> |
| Pre-FEV <sub>1</sub> /FVC | 15 | 15:93817218 | 93817218 | A | G | 0.034 | -5.0102 | 1.01  | 7.11 x 10 <sup>-7</sup> |
| Pre-FEV <sub>1</sub> /FVC | 15 | 15:93818088 | 93818088 | G | C | 0.035 | -5.0107 | 1.01  | 7.10 x 10 <sup>-7</sup> |
| Pre-FEV <sub>1</sub> /FVC | 16 | 16:19508306 | 19508306 | A | G | 0.062 | -3.8078 | 0.786 | 1.25 x 10 <sup>-6</sup> |
| Pre-FEV <sub>1</sub> /FVC | 16 | 16:19597633 | 19597633 | C | G | 0.043 | -4.5022 | 0.945 | 1.88 x 10 <sup>-6</sup> |
| Pre-FEV <sub>1</sub> /FVC | 18 | 18:55422267 | 55422267 | A | G | 0.013 | -7.9629 | 1.67  | 1.80 x 10 <sup>-6</sup> |

108 Supplementary Table 5: Suggestive associations with Pre-FEV<sub>1</sub>/FVC.

| Phenotype             | Chr | SNP          | Position (bp) | A1 | A2 | MAF   | $\beta$ | Std Err | P-value                 |
|-----------------------|-----|--------------|---------------|----|----|-------|---------|---------|-------------------------|
| Post-FEV <sub>1</sub> | 5   | 5:16893255   | 16893255      | A  | G  | 0.034 | -9.3027 | 1.81    | 2.59 x 10 <sup>-7</sup> |
| Post-FEV <sub>1</sub> | 8   | 8:24930702   | 24930702      | A  | C  | 0.017 | 11.1005 | 2.33    | 1.91 x 10 <sup>-6</sup> |
| Post-FEV <sub>1</sub> | 8   | 8:24938579   | 24938579      | C  | G  | 0.017 | 11.1005 | 2.33    | 1.91 x 10 <sup>-6</sup> |
| Post-FEV <sub>1</sub> | 8   | 8:25008509   | 25008509      | G  | C  | 0.017 | 11.1653 | 2.29    | 1.12 x 10 <sup>-6</sup> |
| Post-FEV <sub>1</sub> | 8   | 8:25026871   | 25026871      | A  | G  | 0.016 | 11.5466 | 2.37    | 1.11 x 10 <sup>-6</sup> |
| Post-FEV <sub>1</sub> | 9   | 9:86916173   | 86916173      | A  | G  | 0.130 | -4.5789 | 0.884   | 2.23 x 10 <sup>-7</sup> |
| Post-FEV <sub>1</sub> | 10  | 10:85216527  | 85216527      | C  | T  | 0.053 | 6.4536  | 1.35    | 1.69 x 10 <sup>-6</sup> |
| Post-FEV <sub>1</sub> | 12  | 12:107647422 | 107647422     | G  | A  | 0.104 | -5.0244 | 1.03    | 1.01 x 10 <sup>-6</sup> |
| Post-FEV <sub>1</sub> | 12  | 12:107647912 | 107647912     | G  | A  | 0.104 | -5.0244 | 1.03    | 1.01 x 10 <sup>-6</sup> |
| Post-FEV <sub>1</sub> | 12  | 12:107658715 | 107658715     | G  | A  | 0.104 | -4.9197 | 1.02    | 1.30 x 10 <sup>-6</sup> |
| Post-FEV <sub>1</sub> | 12  | 12:107662094 | 107662094     | T  | C  | 0.103 | -5.3677 | 1.02    | 1.45 x 10 <sup>-7</sup> |
| Post-FEV <sub>1</sub> | 18  | 18:9406106   | 9406106       | A  | G  | 0.029 | -8.2028 | 1.72    | 1.80 x 10 <sup>-6</sup> |
| Post-FEV <sub>1</sub> | 18  | 18:9407212   | 9407212       | A  | G  | 0.029 | -8.2021 | 1.72    | 1.80 x 10 <sup>-6</sup> |
| Post-FEV <sub>1</sub> | 18  | 18:9409089   | 9409089       | C  | A  | 0.029 | -8.2880 | 1.73    | 1.73 x 10 <sup>-6</sup> |
| Post-FEV <sub>1</sub> | 19  | 19:45782594  | 45782594      | G  | A  | 0.073 | -5.3018 | 1.09    | 1.22 x 10 <sup>-6</sup> |
| Post-FEV <sub>1</sub> | 22  | 22:45424732  | 45424732      | T  | C  | 0.024 | 9.6769  | 1.85    | 1.75 x 10 <sup>-7</sup> |
| Post-FEV <sub>1</sub> | 22  | 22:45426957  | 45426957      | A  | G  | 0.023 | 9.2725  | 1.89    | 9.40 x 10 <sup>-7</sup> |

109 Supplementary Table 6: Suggestive associations with Post-FEV<sub>1</sub>.

| Phenotype | Chr | SNP          | Position (bp) | A1 | A2 | MAF   | $\beta$ | Std Err | P-value               |
|-----------|-----|--------------|---------------|----|----|-------|---------|---------|-----------------------|
| Post-FVC  | 1   | 1:195763875  | 195763875     | C  | T  | 0.255 | -3.3983 | 0.700   | $1.21 \times 10^{-6}$ |
| Post-FVC  | 1   | 1:195771663  | 195771663     | T  | C  | 0.259 | -3.4962 | 0.698   | $5.52 \times 10^{-7}$ |
| Post-FVC  | 1   | 1:195771841  | 195771841     | G  | A  | 0.259 | -3.4962 | 0.698   | $5.52 \times 10^{-7}$ |
| Post-FVC  | 1   | 1:195778940  | 195778940     | A  | T  | 0.246 | -3.6116 | 0.720   | $5.29 \times 10^{-7}$ |
| Post-FVC  | 2   | 2:115966363  | 115966363     | C  | T  | 0.072 | 6.0241  | 1.26    | $1.61 \times 10^{-6}$ |
| Post-FVC  | 2   | 2:115978242  | 115978242     | C  | T  | 0.071 | 6.1979  | 1.27    | $9.64 \times 10^{-7}$ |
| Post-FVC  | 2   | 2:115982589  | 115982589     | C  | T  | 0.074 | 6.0001  | 1.24    | $1.37 \times 10^{-6}$ |
| Post-FVC  | 6   | 6:162713288  | 162713288     | A  | G  | 0.014 | 14.0917 | 2.68    | $1.45 \times 10^{-7}$ |
| Post-FVC  | 8   | 8:83741379   | 83741379      | A  | C  | 0.094 | -5.0755 | 1.07    | $1.89 \times 10^{-6}$ |
| Post-FVC  | 8   | 8:119895298  | 119895298     | C  | A  | 0.021 | 11.6893 | 2.31    | $4.31 \times 10^{-7}$ |
| Post-FVC  | 11  | 11:118902275 | 118902275     | C  | T  | 0.010 | 17.9775 | 3.29    | $4.83 \times 10^{-8}$ |
| Post-FVC  | 11  | 11:118905095 | 118905095     | A  | G  | 0.010 | 17.9775 | 3.29    | $4.83 \times 10^{-8}$ |
| Post-FVC  | 11  | 11:118905316 | 118905316     | T  | C  | 0.010 | 17.9775 | 3.29    | $4.83 \times 10^{-8}$ |
| Post-FVC  | 11  | 11:118906065 | 118906065     | A  | G  | 0.010 | 17.9775 | 3.29    | $4.83 \times 10^{-8}$ |
| Post-FVC  | 11  | 11:118906240 | 118906240     | T  | C  | 0.010 | 17.9775 | 3.29    | $4.83 \times 10^{-8}$ |
| Post-FVC  | 11  | 11:118906745 | 118906745     | C  | G  | 0.010 | 17.9775 | 3.29    | $4.83 \times 10^{-8}$ |
| Post-FVC  | 11  | 11:118907923 | 118907923     | G  | T  | 0.010 | 18.2978 | 3.41    | $7.85 \times 10^{-8}$ |
| Post-FVC  | 11  | 11:118932913 | 118932913     | C  | T  | 0.010 | 18.9094 | 3.29    | $9.47 \times 10^{-9}$ |
| Post-FVC  | 12  | 12:107662094 | 107662094     | T  | C  | 0.103 | -5.1924 | 1.05    | $6.91 \times 10^{-7}$ |
| Post-FVC  | 12  | 12:115797499 | 115797499     | G  | A  | 0.060 | 6.6259  | 1.33    | $6.34 \times 10^{-7}$ |
| Post-FVC  | 17  | 17:74377172  | 74377172      | T  | C  | 0.110 | 4.8181  | 0.955   | $4.54 \times 10^{-7}$ |
| Post-FVC  | 18  | 18:67404762  | 67404762      | A  | C  | 0.010 | 16.4840 | 3.40    | $1.28 \times 10^{-6}$ |
| Post-FVC  | 18  | 18:67404973  | 67404973      | A  | G  | 0.010 | 16.4840 | 3.40    | $1.28 \times 10^{-6}$ |
| Post-FVC  | 18  | 18:67404990  | 67404990      | T  | G  | 0.010 | 16.4840 | 3.40    | $1.28 \times 10^{-6}$ |
| Post-FVC  | 19  | 19:4289259   | 4289259       | T  | C  | 0.106 | 5.1672  | 0.967   | $9.21 \times 10^{-8}$ |
| Post-FVC  | 19  | 19:4291817   | 4291817       | T  | C  | 0.111 | 5.2674  | 0.963   | $4.52 \times 10^{-8}$ |
| Post-FVC  | 19  | 19:4294011   | 4294011       | C  | A  | 0.140 | 4.3027  | 0.885   | $1.15 \times 10^{-6}$ |
| Post-FVC  | 19  | 19:4294410   | 4294410       | C  | T  | 0.157 | 4.0184  | 0.829   | $1.25 \times 10^{-6}$ |
| Post-FVC  | 19  | 19:4298416   | 4298416       | A  | G  | 0.153 | 4.1478  | 0.847   | $9.85 \times 10^{-7}$ |
| Post-FVC  | 19  | 19:4302569   | 4302569       | G  | A  | 0.156 | 4.0985  | 0.840   | $1.05 \times 10^{-6}$ |
| Post-FVC  | 19  | 19:36372775  | 36372775      | T  | C  | 0.129 | -4.2774 | 0.889   | $1.49 \times 10^{-6}$ |
| Post-FVC  | 19  | 19:36374386  | 36374386      | G  | T  | 0.272 | -3.3295 | 0.698   | $1.87 \times 10^{-6}$ |
| Post-FVC  | 19  | 19:36376980  | 36376980      | A  | G  | 0.129 | -4.2471 | 0.890   | $1.82 \times 10^{-6}$ |
| Post-FVC  | 21  | 21:18234328  | 18234328      | T  | C  | 0.012 | 12.7085 | 2.62    | $1.19 \times 10^{-6}$ |
| Post-FVC  | 21  | 21:18234404  | 18234404      | A  | G  | 0.012 | 12.7085 | 2.62    | $1.19 \times 10^{-6}$ |
| Post-FVC  | 21  | 21:43755177  | 43755177      | G  | A  | 0.091 | 5.5767  | 1.15    | $1.25 \times 10^{-6}$ |

111 Supplementary Table 7: Suggestive associations with Post-FVC.

| Phenotype                  | Chr | SNP         | Position (bp) | A1 | A2 | MAF   | $\beta$ | Std Err | P-value                 |
|----------------------------|-----|-------------|---------------|----|----|-------|---------|---------|-------------------------|
| Post-FEV <sub>1</sub> /FVC | 1   | 1:117580100 | 117580100     | G  | A  | 0.015 | -7.0892 | 1.45    | 1.01 x 10 <sup>-6</sup> |
| Post-FEV <sub>1</sub> /FVC | 1   | 1:117580363 | 117580363     | C  | T  | 0.015 | -7.0892 | 1.45    | 1.01 x 10 <sup>-6</sup> |
| Post-FEV <sub>1</sub> /FVC | 1   | 1:180886944 | 180886944     | C  | T  | 0.015 | -7.0382 | 1.35    | 1.76 x 10 <sup>-7</sup> |
| Post-FEV <sub>1</sub> /FVC | 1   | 1:180959189 | 180959189     | G  | A  | 0.010 | -7.7534 | 1.58    | 9.13 x 10 <sup>-7</sup> |
| Post-FEV <sub>1</sub> /FVC | 1   | 1:180970045 | 180970045     | C  | T  | 0.010 | -7.7534 | 1.58    | 9.13 x 10 <sup>-7</sup> |
| Post-FEV <sub>1</sub> /FVC | 1   | 1:185527158 | 185527158     | G  | C  | 0.013 | -9.4499 | 1.86    | 3.80 x 10 <sup>-7</sup> |
| Post-FEV <sub>1</sub> /FVC | 2   | 2:26387193  | 26387193      | G  | C  | 0.125 | -2.4299 | 0.510   | 1.90 x 10 <sup>-6</sup> |
| Post-FEV <sub>1</sub> /FVC | 2   | 2:26390965  | 26390965      | A  | G  | 0.131 | -2.4049 | 0.504   | 1.79 x 10 <sup>-6</sup> |
| Post-FEV <sub>1</sub> /FVC | 2   | 2:26392354  | 26392354      | A  | C  | 0.131 | -2.4220 | 0.504   | 1.56 x 10 <sup>-6</sup> |
| Post-FEV <sub>1</sub> /FVC | 2   | 2:171008016 | 171008016     | G  | A  | 0.014 | -6.9043 | 1.37    | 4.70 x 10 <sup>-7</sup> |
| Post-FEV <sub>1</sub> /FVC | 3   | 3:22321021  | 22321021      | A  | G  | 0.013 | -7.8568 | 1.52    | 2.17 x 10 <sup>-7</sup> |
| Post-FEV <sub>1</sub> /FVC | 3   | 3:49908748  | 49908748      | A  | G  | 0.012 | -8.5469 | 1.70    | 5.07 x 10 <sup>-7</sup> |
| Post-FEV <sub>1</sub> /FVC | 3   | 3:49908976  | 49908976      | C  | T  | 0.012 | -8.5469 | 1.70    | 5.07 x 10 <sup>-7</sup> |
| Post-FEV <sub>1</sub> /FVC | 3   | 3:49945028  | 49945028      | G  | A  | 0.010 | -9.0560 | 1.86    | 1.11 x 10 <sup>-6</sup> |
| Post-FEV <sub>1</sub> /FVC | 4   | 4:55555416  | 55555416      | G  | A  | 0.031 | -4.4167 | 0.923   | 1.69 x 10 <sup>-6</sup> |
| Post-FEV <sub>1</sub> /FVC | 4   | 4:55568875  | 55568875      | A  | G  | 0.030 | -4.4141 | 0.922   | 1.70 x 10 <sup>-6</sup> |
| Post-FEV <sub>1</sub> /FVC | 4   | 4:70284767  | 70284767      | A  | T  | 0.010 | -9.5784 | 1.87    | 2.89 x 10 <sup>-7</sup> |
| Post-FEV <sub>1</sub> /FVC | 4   | 4:70338226  | 70338226      | A  | G  | 0.012 | -8.7913 | 1.71    | 2.53 x 10 <sup>-7</sup> |
| Post-FEV <sub>1</sub> /FVC | 5   | 5:89139642  | 89139642      | G  | A  | 0.011 | -8.3271 | 1.65    | 4.85 x 10 <sup>-7</sup> |
| Post-FEV <sub>1</sub> /FVC | 5   | 5:89174965  | 89174965      | T  | C  | 0.011 | -8.3271 | 1.65    | 4.85 x 10 <sup>-7</sup> |
| Post-FEV <sub>1</sub> /FVC | 5   | 5:89201706  | 89201706      | T  | C  | 0.011 | -8.3265 | 1.65    | 4.86 x 10 <sup>-7</sup> |
| Post-FEV <sub>1</sub> /FVC | 8   | 8:4110597   | 4110597       | A  | G  | 0.066 | -3.3772 | 0.704   | 1.60 x 10 <sup>-6</sup> |
| Post-FEV <sub>1</sub> /FVC | 10  | 10:69583770 | 69583770      | T  | C  | 0.030 | -4.7114 | 0.982   | 1.59 x 10 <sup>-6</sup> |
| Post-FEV <sub>1</sub> /FVC | 11  | 11:35570480 | 35570480      | A  | G  | 0.016 | -6.1461 | 1.27    | 1.20 x 10 <sup>-6</sup> |
| Post-FEV <sub>1</sub> /FVC | 11  | 11:35573791 | 35573791      | T  | A  | 0.017 | -6.1468 | 1.27    | 1.20 x 10 <sup>-6</sup> |
| Post-FEV <sub>1</sub> /FVC | 11  | 11:35577589 | 35577589      | A  | G  | 0.016 | -6.2517 | 1.30    | 1.66 x 10 <sup>-6</sup> |
| Post-FEV <sub>1</sub> /FVC | 12  | 12:4773488  | 4773488       | C  | A  | 0.015 | -7.0233 | 1.35    | 1.91 x 10 <sup>-7</sup> |
| Post-FEV <sub>1</sub> /FVC | 12  | 12:4773489  | 4773489       | C  | G  | 0.015 | -7.0233 | 1.35    | 1.91 x 10 <sup>-7</sup> |
| Post-FEV <sub>1</sub> /FVC | 12  | 12:4777393  | 4777393       | A  | G  | 0.015 | -7.0361 | 1.40    | 4.98 x 10 <sup>-7</sup> |
| Post-FEV <sub>1</sub> /FVC | 12  | 12:4784518  | 4784518       | T  | C  | 0.018 | -6.3324 | 1.27    | 6.11 x 10 <sup>-7</sup> |
| Post-FEV <sub>1</sub> /FVC | 12  | 12:4784582  | 4784582       | T  | G  | 0.018 | -6.3324 | 1.27    | 6.11 x 10 <sup>-7</sup> |
| Post-FEV <sub>1</sub> /FVC | 12  | 12:4786418  | 4786418       | A  | G  | 0.018 | -6.1523 | 1.25    | 8.81 x 10 <sup>-7</sup> |
| Post-FEV <sub>1</sub> /FVC | 12  | 12:4787767  | 4787767       | G  | A  | 0.018 | -6.1514 | 1.25    | 8.83 x 10 <sup>-7</sup> |
| Post-FEV <sub>1</sub> /FVC | 12  | 12:4788226  | 4788226       | A  | G  | 0.018 | -6.1531 | 1.25    | 8.80 x 10 <sup>-7</sup> |
| Post-FEV <sub>1</sub> /FVC | 12  | 12:4793670  | 4793670       | A  | G  | 0.020 | -5.7624 | 1.20    | 1.63 x 10 <sup>-6</sup> |
| Post-FEV <sub>1</sub> /FVC | 14  | 14:38963901 | 38963901      | C  | T  | 0.084 | -3.3320 | 0.673   | 7.50 x 10 <sup>-7</sup> |
| Post-FEV <sub>1</sub> /FVC | 15  | 15:76052762 | 76052762      | T  | G  | 0.344 | -1.8331 | 0.372   | 8.07 x 10 <sup>-7</sup> |
| Post-FEV <sub>1</sub> /FVC | 15  | 15:76057486 | 76057486      | A  | G  | 0.336 | -1.8270 | 0.373   | 9.50 x 10 <sup>-7</sup> |
| Post-FEV <sub>1</sub> /FVC | 15  | 15:76057493 | 76057493      | T  | C  | 0.355 | -1.8888 | 0.368   | 2.96 x 10 <sup>-7</sup> |
| Post-FEV <sub>1</sub> /FVC | 15  | 15:85798401 | 85798401      | A  | G  | 0.018 | -6.7846 | 1.27    | 9.05 x 10 <sup>-8</sup> |
| Post-FEV <sub>1</sub> /FVC | 15  | 15:85819723 | 85819723      | C  | T  | 0.020 | -5.8136 | 1.21    | 1.68 x 10 <sup>-6</sup> |
| Post-FEV <sub>1</sub> /FVC | 15  | 15:85885031 | 85885031      | A  | C  | 0.034 | -4.9213 | 0.955   | 2.55 x 10 <sup>-7</sup> |
| Post-FEV <sub>1</sub> /FVC | 15  | 15:88957199 | 88957199      | G  | T  | 0.089 | -2.8154 | 0.591   | 1.93 x 10 <sup>-6</sup> |

|                            |    |             |          |   |   |       |         |       |                         |
|----------------------------|----|-------------|----------|---|---|-------|---------|-------|-------------------------|
| Post-FEV <sub>1</sub> /FVC | 15 | 15:93817218 | 93817218 | A | G | 0.034 | -5.0171 | 0.968 | 2.19 x 10 <sup>-7</sup> |
| Post-FEV <sub>1</sub> /FVC | 15 | 15:93818088 | 93818088 | G | C | 0.035 | -5.0166 | 0.968 | 2.20 x 10 <sup>-7</sup> |
| Post-FEV <sub>1</sub> /FVC | 17 | 17:57263393 | 57263393 | A | G | 0.346 | -1.8380 | 0.380 | 1.30 x 10 <sup>-6</sup> |
| Post-FEV <sub>1</sub> /FVC | 17 | 17:57273681 | 57273681 | C | T | 0.345 | -1.8303 | 0.379 | 1.35 x 10 <sup>-6</sup> |
| Post-FEV <sub>1</sub> /FVC | 17 | 17:57274481 | 57274481 | C | T | 0.345 | -1.8303 | 0.379 | 1.35 x 10 <sup>-6</sup> |
| Post-FEV <sub>1</sub> /FVC | 17 | 17:57276710 | 57276710 | A | G | 0.345 | -1.8301 | 0.379 | 1.35 x 10 <sup>-6</sup> |
| Post-FEV <sub>1</sub> /FVC | 17 | 17:78917207 | 78917207 | T | G | 0.015 | -7.8302 | 1.58  | 7.44 x 10 <sup>-7</sup> |

12 Supplementary Table 8: Suggestive associations with Post-FEV<sub>1</sub>/FVC.



### Pre-FEV1/FVC GWAS

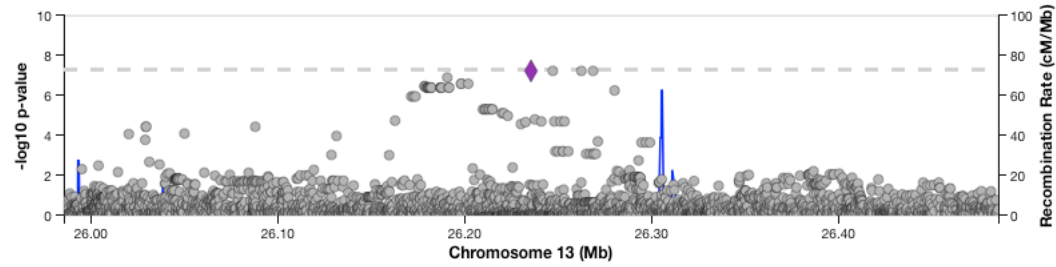

#### Hits in GWAS Catalog

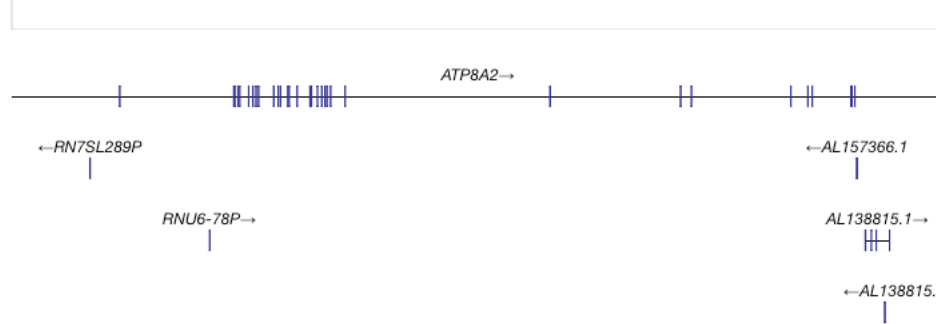

113

114 Supplementary Figure 6: The region encompassing four variants on chromosome 13 significantly associated with Pre-FEV<sub>1</sub>/FVC.

### Pre-FVC GWAS

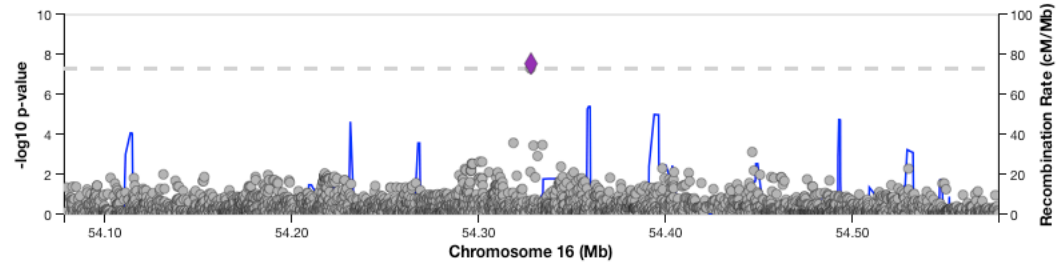

#### Hits in GWAS Catalog

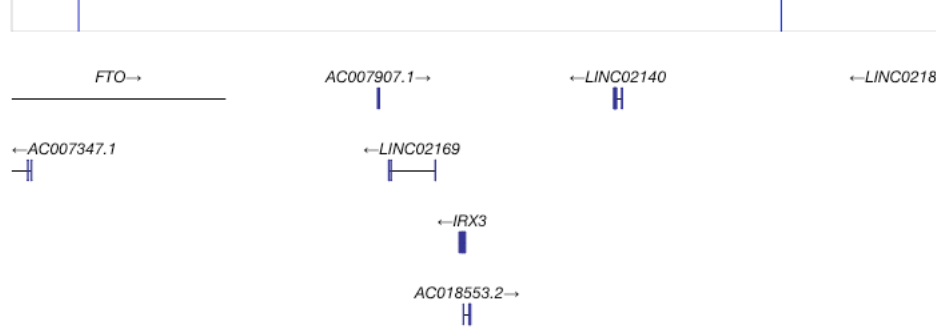

115

116 Supplementary Figure 7: The region encompassing two variants on chromosome 16 significantly associated with Pre-FVC.

### Pre-FVC GWAS

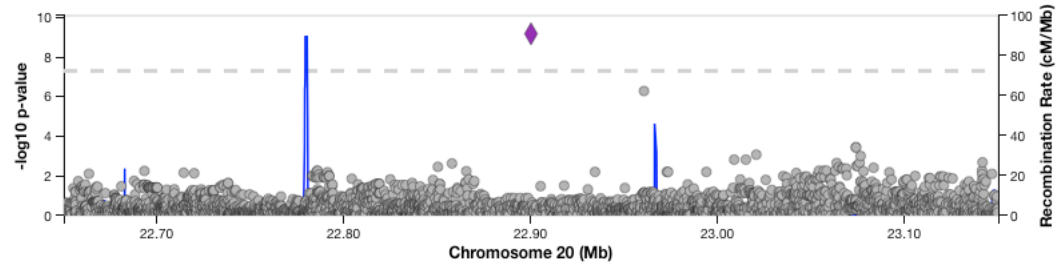

#### Hits in GWAS Catalog

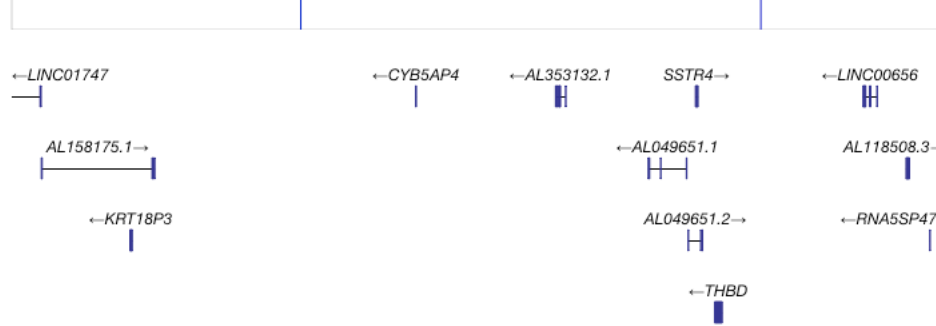

17

18 Supplementary Figure 8: The region encompassing a variant on chromosome 20 significantly associated with Pre-FVC.

### Post-FVC GWAS

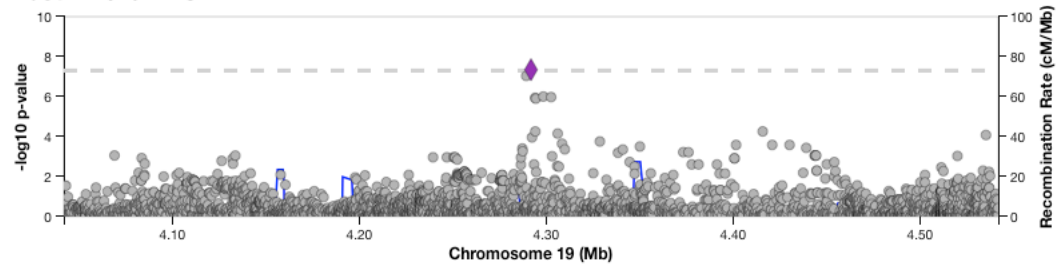

#### Hits in GWAS Catalog

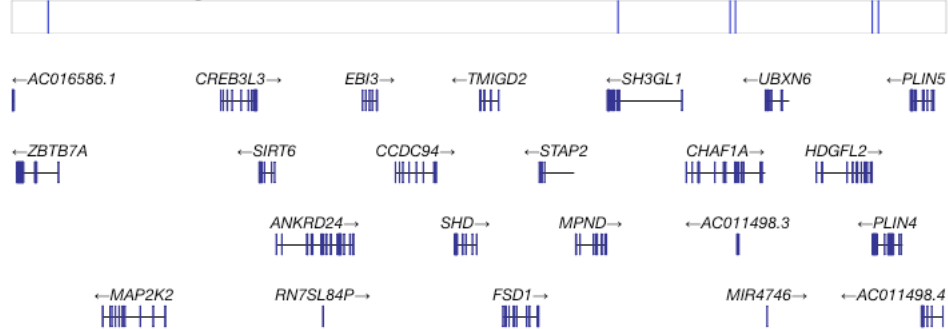

19

20 Supplementary Figure 9: The region encompassing two variants on chromosome 19 significantly associated with Post-FVC.

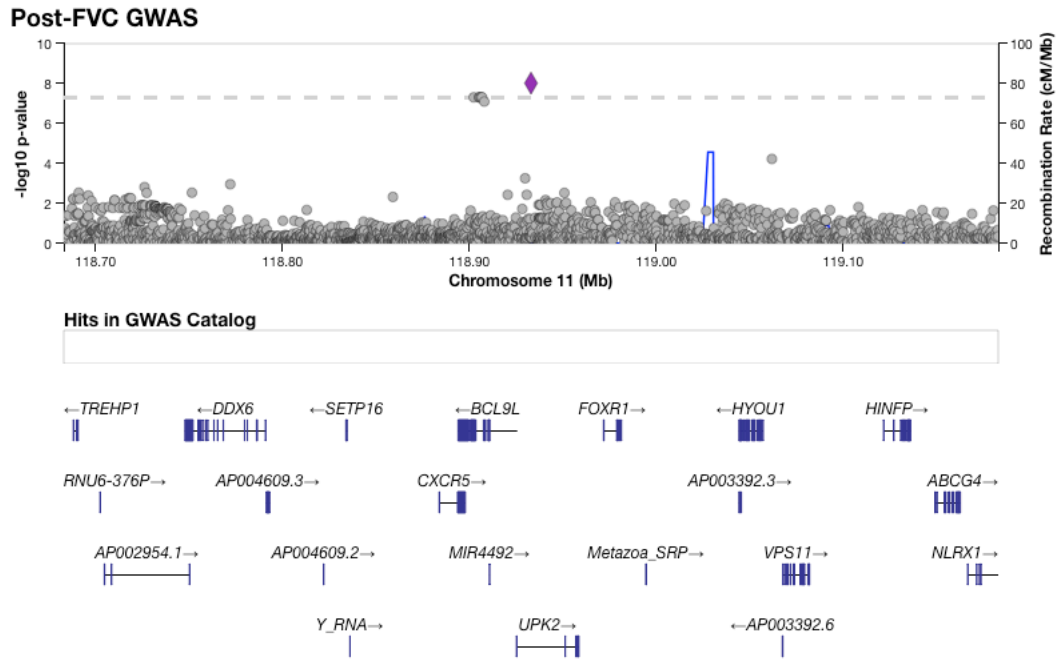

21

22 Supplementary Figure 10: The region encompassing eight variants on chromosome 11 significantly associated with Post-FVC.

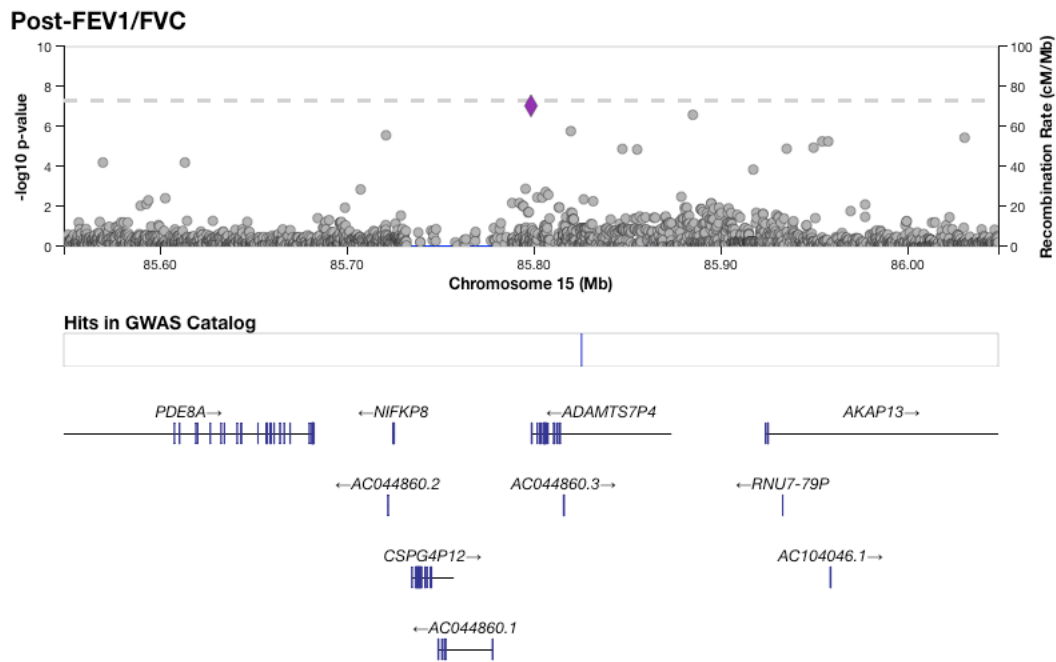

23

24 Supplementary Figure 11: The region surrounding a single variant on chromosome 15 significantly associated with Post-FE1/FVC.

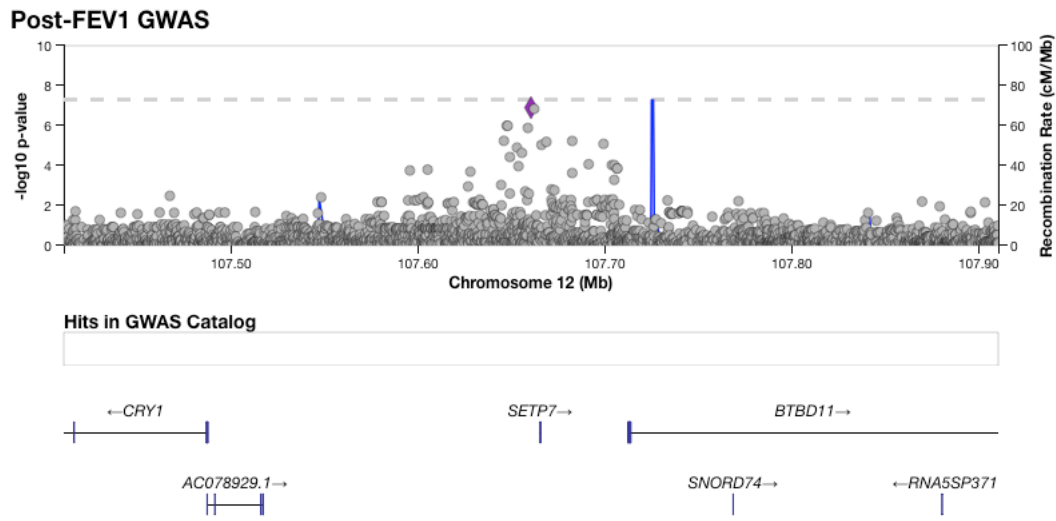

25

26 Supplementary Figure 12: The region around four variants suggestively associated with Post-FEV<sub>1</sub>.

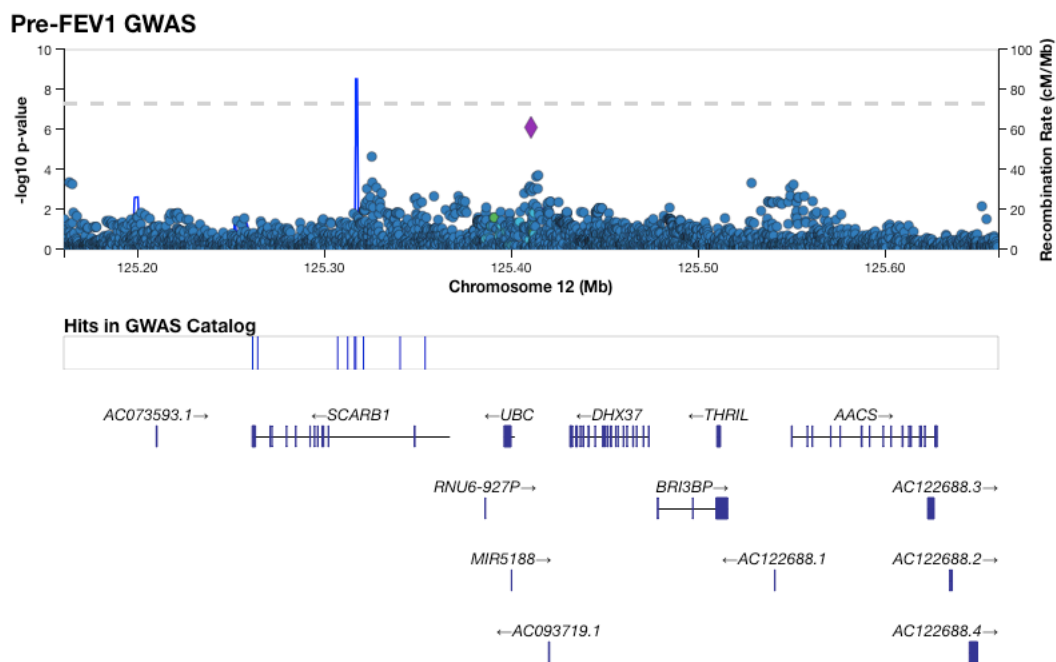

27

28 Supplementary Figure 13: The region around a variant on chromosome 12 suggestively associated with Pre-FEV<sub>1</sub>.

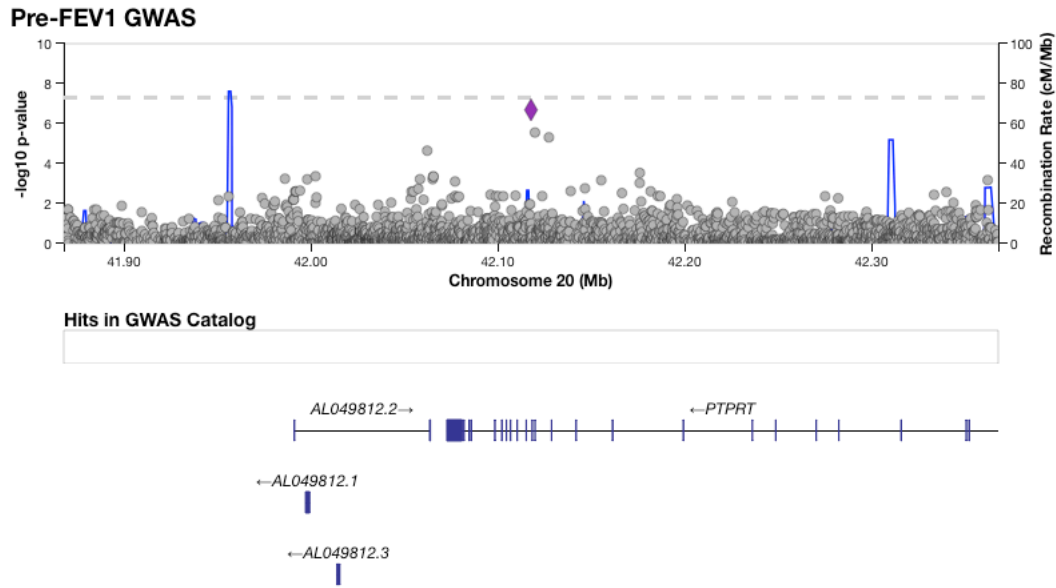

129

130 Supplementary Figure 14: The region around a variant on chromosome 20 suggestively associated with Pre-FEV<sub>1</sub>.

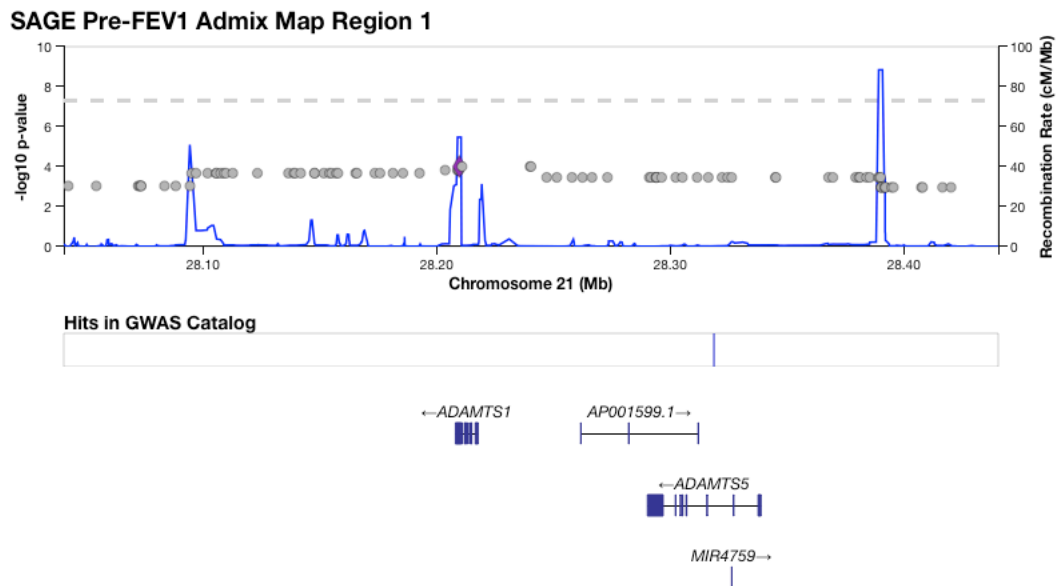

131

132 Supplementary Figure 15: The region on chromosome 21 identified by admixture mapping as significantly associated with Pre-FEV<sub>1</sub>.

Gene expression for ADAMTS1 (ENSG00000154734.14)

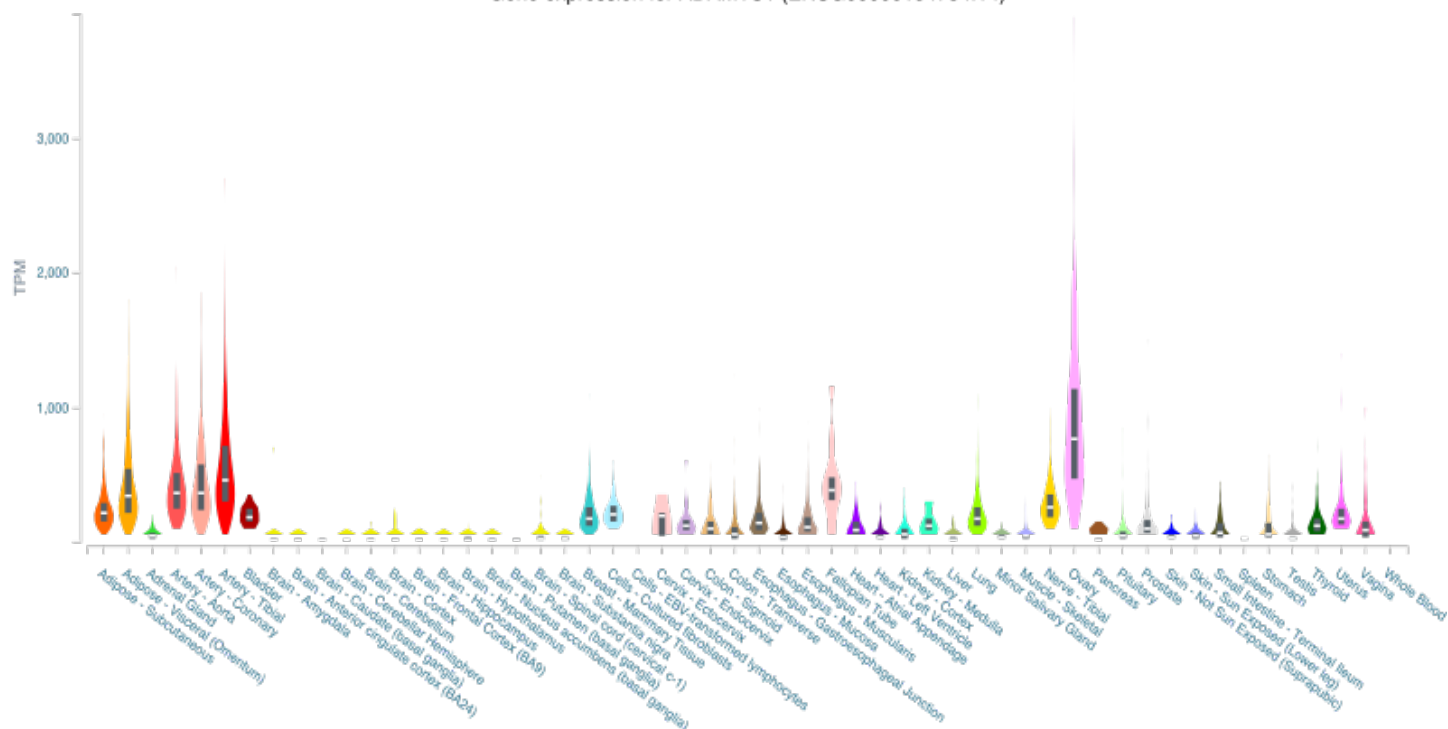

Gene expression for ADAMTS5 (ENSG00000154736.5)

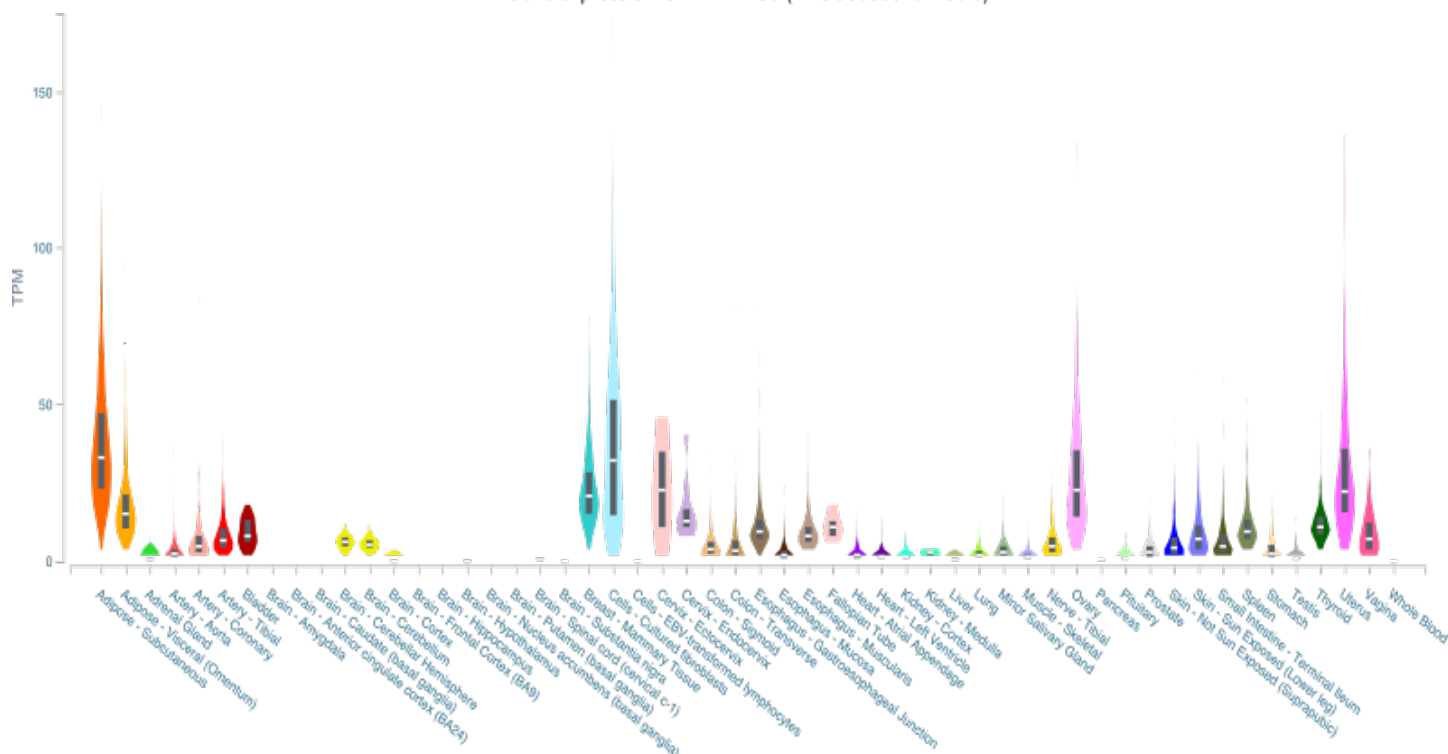

133

134 Supplementary Figure 16: Tissue-specific gene expression for *ADAMTS1* (top) and *ADAMTS5* (bottom) from GTEx v8. Both genes are  
135 expressed in certain tissues, such as ovary and vagina. However, *ADAMTS1* shows markedly higher expression in lung and arterial  
136 tissue, while *ADAMTS5* is more strongly expressed in breast, fibroblast, cervix, adipose, and whole blood.

### Pre-FVC Admix Map Region 2

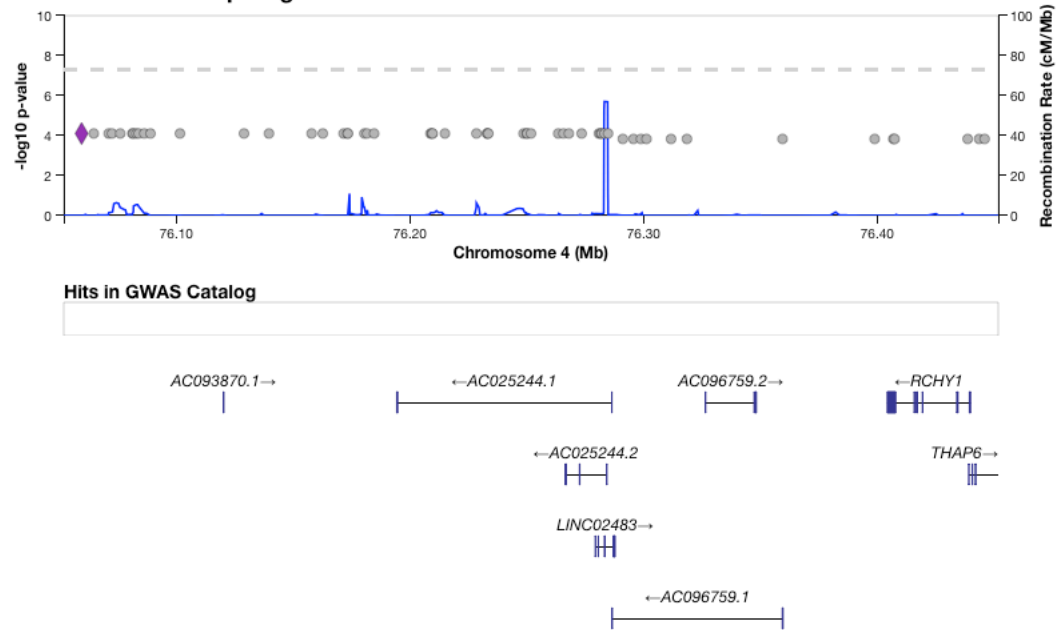

### Pre-FEV1/FVC Admix Map Region 3

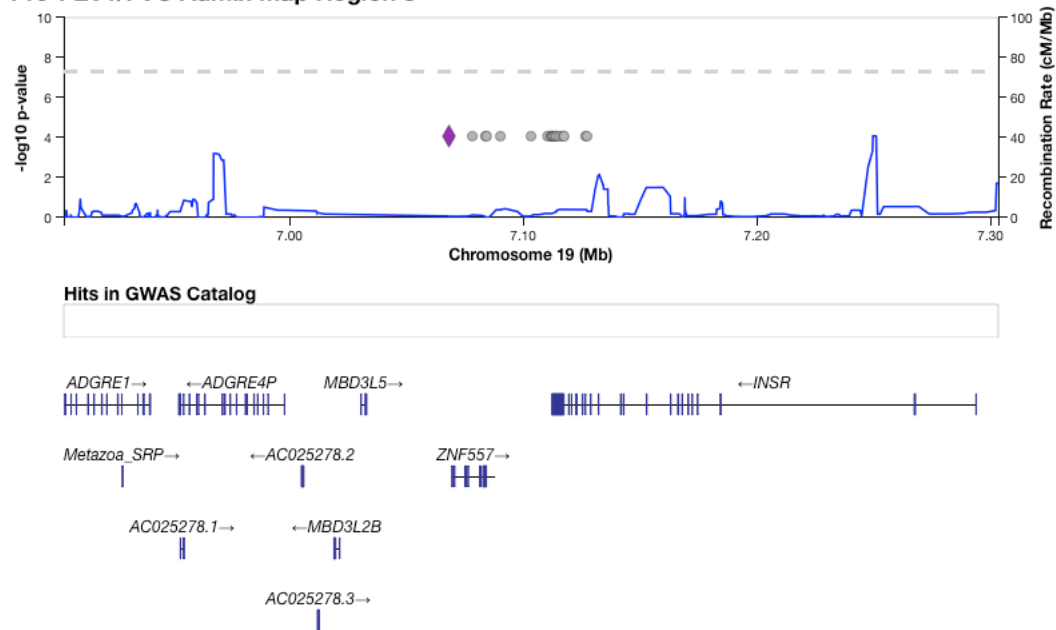

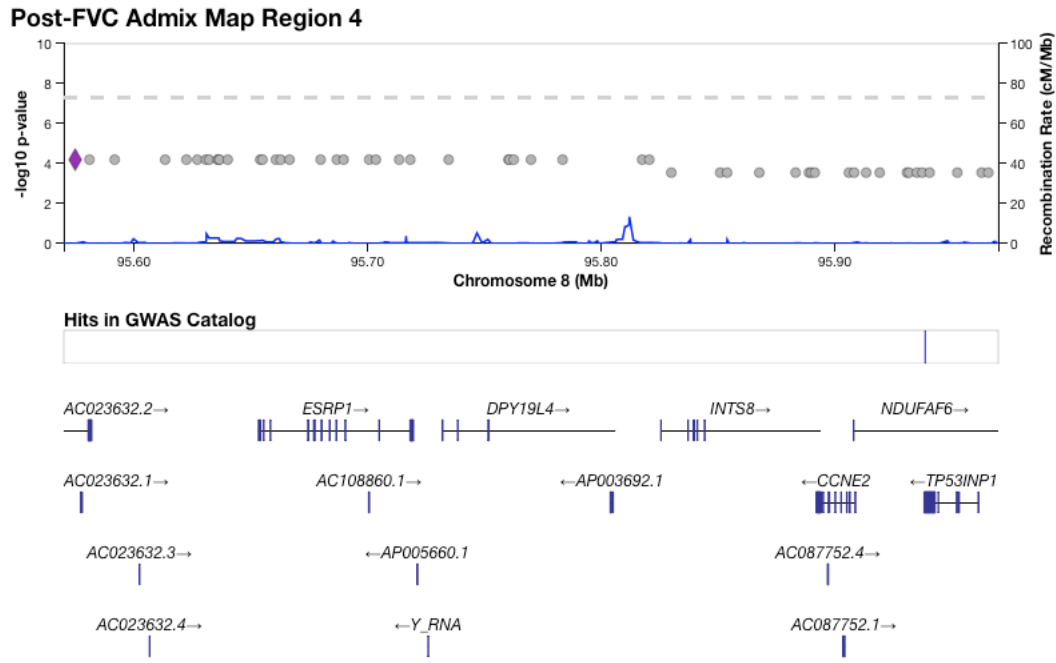

142

143 Supplementary Figure 19: The region on chromosome 8 identified by admixture mapping as significantly associated with Post-FVC.

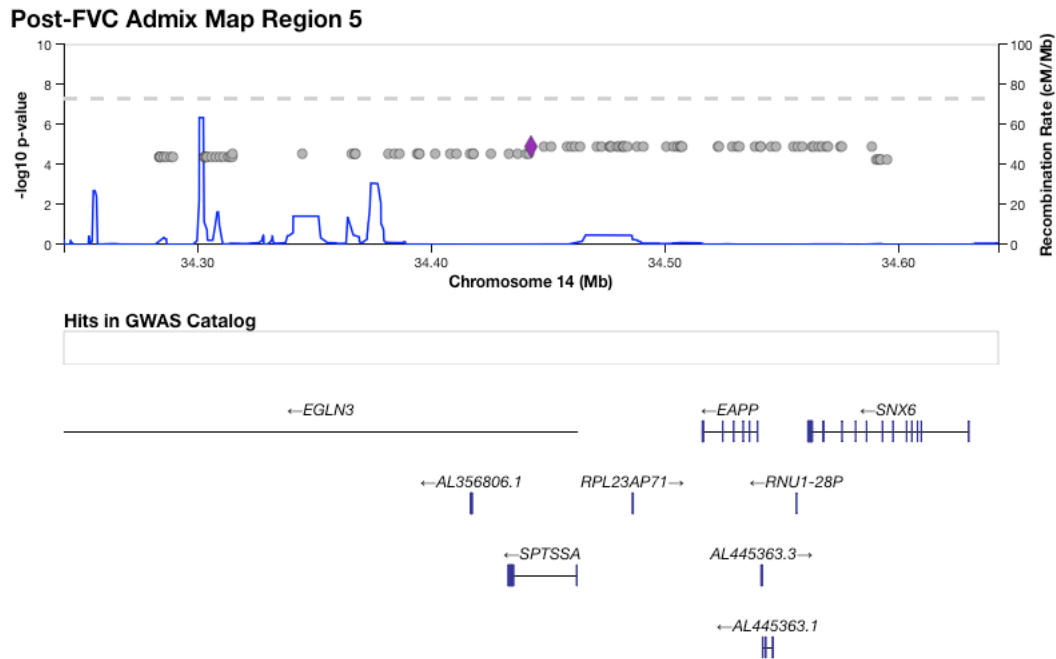

144

145 Supplementary Figure 20: The region on chromosome 14 identified by admixture mapping as significantly associated with Post-FVC.



## chr21:28209667 G/A

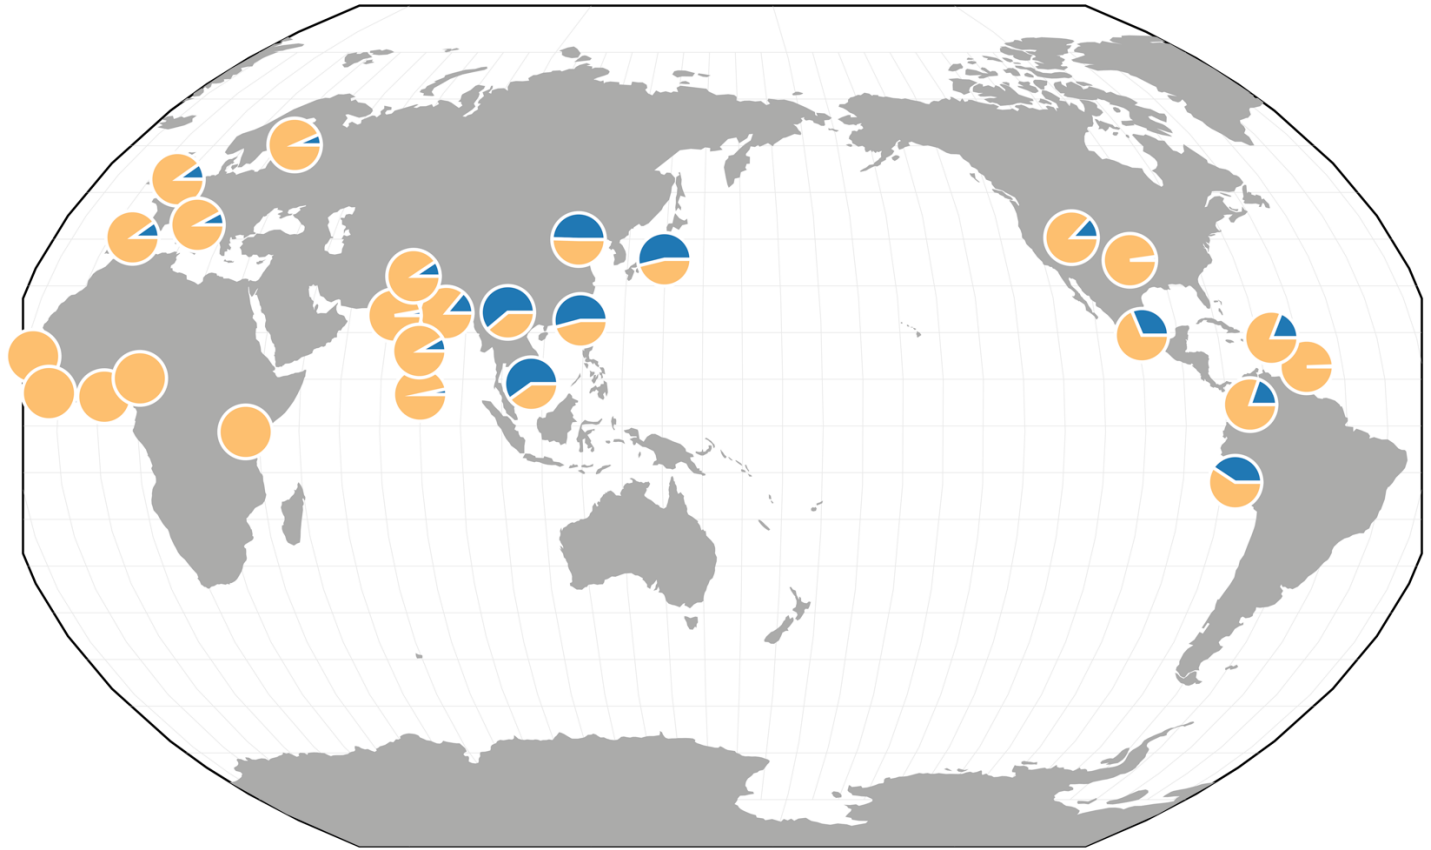

146

147 Supplementary Figure 21: Distribution of minor allele frequencies for SNP rs13615 in 1000 Genomes populations (hg19 build). The  
148 derived allele G shows strong separation by distance, with high prevalence in East Asia, moderately high prevalence in the Americas,  
149 and low prevalence in Europeans and South Asians. However, in Africans and African-derived populations from 1000 Genomes, the  
150 G allele occurs at very low frequency, if at all.

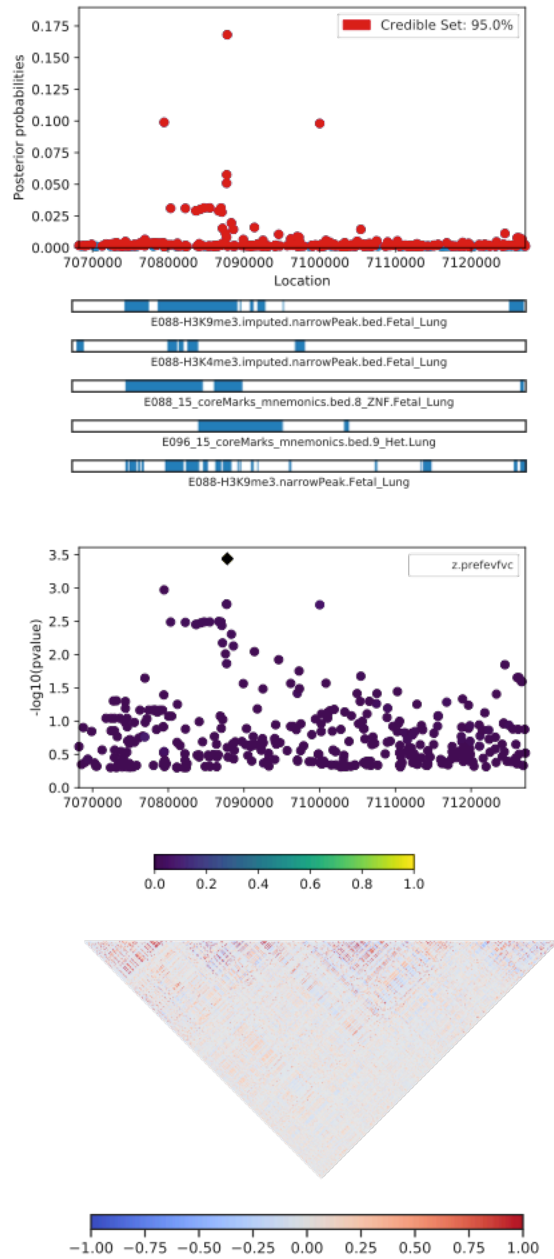

51

52 Supplementary Figure 22: A CANVIS plot of results from PAINTOR fine-mapping for locus 3, an association on chromosome 19 with  
53 Pre-FEV<sub>1</sub>/FVC. The SNP with highest posterior probability of causality (0.168) is rs72986681.

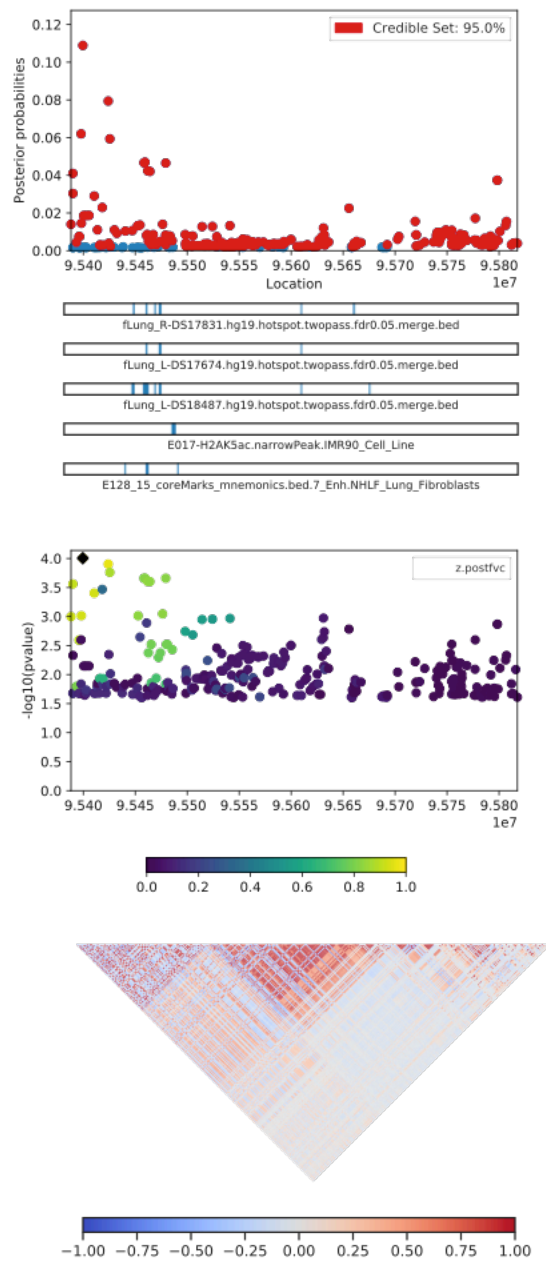

154

155 Supplementary Figure 23: A CANVIS plot of results from PAINTOR fine-mapping for locus 4, an association on chromosome 8 with  
156 Post-FVC. The SNP with highest posterior probability of causality (0.109) is rs2470740.

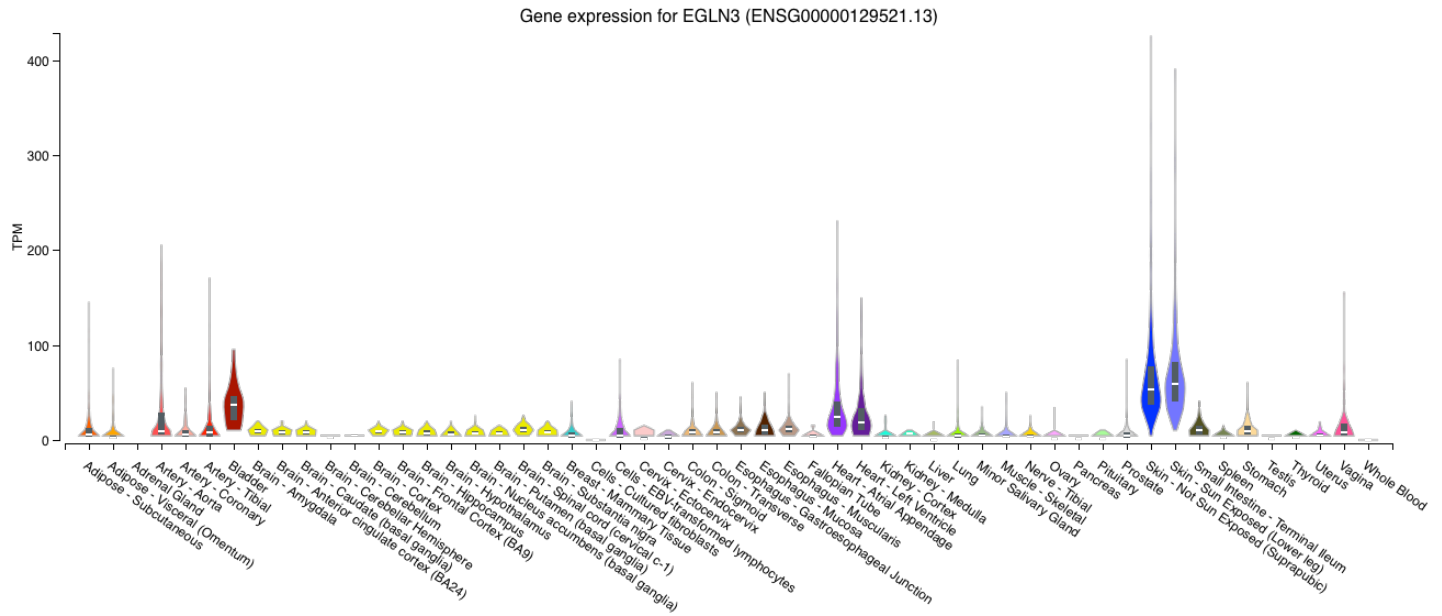

157

158 Supplementary Figure 24: Expression profile for the gene *EGLN3* across tissue types from GTEx v8. *EGLN3* is most strongly expressed  
159 in skin and bladder, but also shows nontrivial expression in heart and arterial tissue.

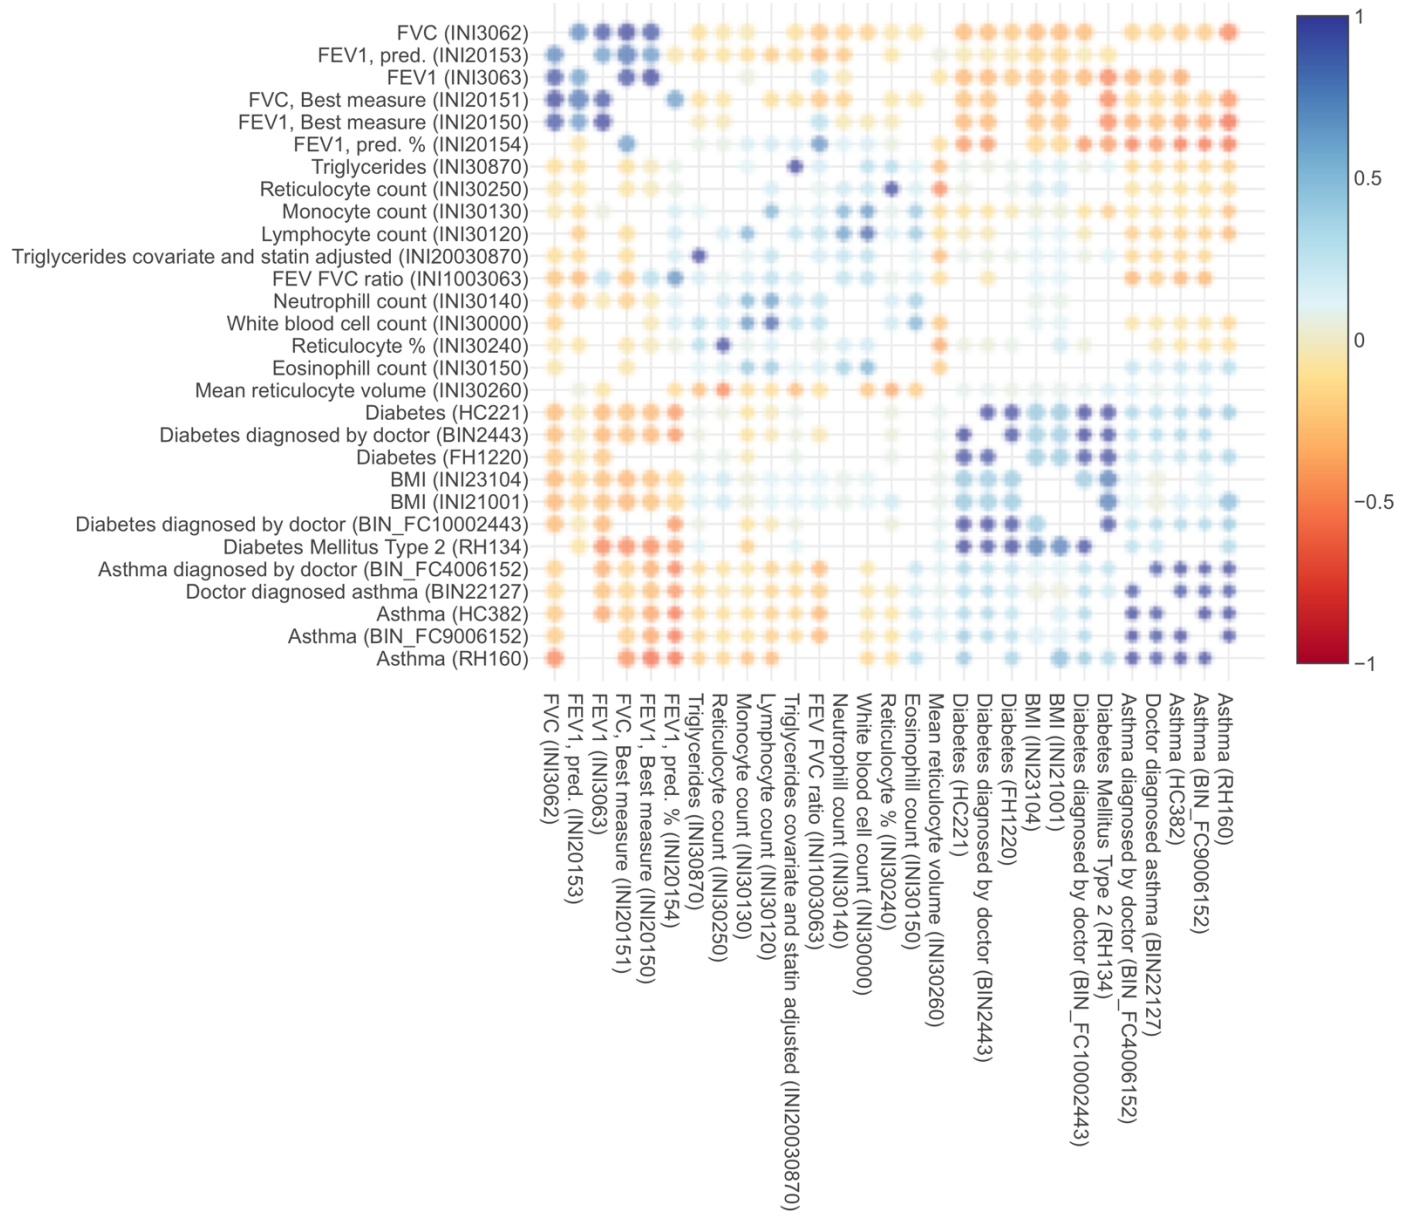

160

161 Supplementary Figure 25: Genetic correlations between lung, heart, blood, and obesity traits, computed from the UK Biobank.
